# Supplementary material for: Gene module based regulator inference identifying miR-139 as a tumor suppressor in colorectal cancer
Source: Royal Society of Chemistry journal article supplement (doi:10.1039/c4mb00329b), 2014-09-30
Supplement: c4mb00329b1.xlsx [file c4mb00329b1.xlsx]

## Sheet: Module_Gene
ID	Symbol	Seed	Degree	Betweenness	Closeness
2	A2M		2	9.01e-05	0.240551
19	ABCA1	DE_Genes	2	0.00017662	0.27671
25	ABL1		13	0.00525206	0.330117
60	ACTB		4	0.00061378	0.292587
86	ACTL6A	DE_Genes	8	0.00307367	0.300733
87	ACTN1		3	0.00024192	0.263733
90	ACVR1		3	0.00214954	0.246473
142	PARP1		11	0.00207228	0.332254
163	AP2B1		6	0.00106478	0.265352
166	AES	DE_Genes	4	0.00257679	0.284477
196	AHR		9	0.00155567	0.326052
207	AKT1		29	0.0236947	0.359143
274	BIN1		5	0.00291166	0.286162
306	ANXA3	DE_Genes	2	0.00010716	0.305091
311	ANXA11		2	0.00027577	0.234504
328	APEX1	DE_Genes	6	0.00288429	0.311812
329	BIRC2	DE_Genes	11	0.00672622	0.292796
330	BIRC3		5	0.00069338	0.279157
331	XIAP		13	0.00596353	0.306458
332	BIRC5		5	0.00054221	0.265267
369	ARAF		3	0.00024762	0.259236
375	ARF1		8	0.00192321	0.246547
382	ARF6	DE_Genes	5	0.00025808	0.244491
396	ARHGDIA		6	0.00100334	0.292379
408	ARRB1	DE_Genes	9	0.00494657	0.300953
409	ARRB2		7	0.00378642	0.289697
468	ATF4		5	0.00144297	0.284971
546	ATRX		3	0.00022311	0.275874
572	BAD		13	0.00598477	0.315527
573	BAG1		5	0.00067584	0.30284
578	BAK1		5	0.00383651	0.307837
580	BARD1		7	0.00352632	0.320078
581	BAX		6	0.00148097	0.261132
595	CCND1	DE_Genes	17	0.00800244	0.338696
598	BCL2L1		17	0.017309	0.332254
599	BCL2L2	DE_Genes	4	0.0004795	0.244491
602	BCL3		12	0.00208537	0.327352
604	BCL6		7	0.00083307	0.309344
605	BCL7A	DE_Genes	1	0	0.227424
608	TNFRSF17	DE_Genes	3	0.00060279	0.268828
641	BLM		7	0.00170035	0.315163
659	BMPR2		3	0.00046643	0.211271
688	KLF5		4	0.00076686	0.305432
694	BTG1	DE_Genes	2	3.455e-05	0.237489
695	BTK		11	0.00286883	0.286562
701	BUB1B	DE_Genes	7	0.00094428	0.285069
708	C1QBP		6	0.00085098	0.302283
768	CA9	DE_Genes	3	0	0.27449
811	CALR		3	0.0004246	0.278494
819	CAMLG		2	0.00021846	0.265524
834	CASP1		2	9.766e-05	0.268125
836	CASP3		13	0.00469714	0.297572
840	CASP7	DE_Genes	7	0.0008279	0.269622
841	CASP8		15	0.00608851	0.320453
842	CASP9		4	0.00111335	0.287465
843	CASP10		7	0.00077278	0.270244
857	CAV1		9	0.0060967	0.325664
867	CBL		11	0.00214516	0.307606
890	CCNA2		10	0.00275376	0.331717
891	CCNB1	DE_Genes	9	0.00417663	0.297464
894	CCND2		6	0.00068654	0.287465
898	CCNE1	DE_Genes	10	0.00161184	0.31468
899	CCNF	DE_Genes	1	0	0.22933
900	CCNG1	DE_Genes	2	0.00060431	0.30284
939	CD27	DE_Genes	3	1.85e-05	0.268564
958	CD40		8	0.00113851	0.297033
960	CD44		7	0.00114436	0.287364
983	CDK1	DE_Genes	22	0.0147263	0.342511
990	CDC6		4	0.00022109	0.286063
991	CDC20	DE_Genes	14	0.00587413	0.292171
993	CDC25A		13	0.00408664	0.330249
994	CDC25B	DE_Genes	8	0.00347701	0.304412
996	CDC27	DE_Genes	12	0.00342449	0.308415
998	CDC42		10	0.00565643	0.323483
1003	CDH5		6	0.00111947	0.289186
1017	CDK2		20	0.00980149	0.346999
1019	CDK4		13	0.00527293	0.31028
1020	CDK5	DE_Genes	7	0.00337686	0.313718
1022	CDK7		6	0.00025893	0.276991
1026	CDKN1A	DE_Genes	22	0.0129971	0.337443
1027	CDKN1B		15	0.00878524	0.331583
1033	CDKN3	DE_Genes	2	1.137e-05	0.268916
1051	CEBPB	DE_Genes	19	0.0090157	0.353118
1108	CHD4	DE_Genes	3	8.207e-05	0.286362
1111	CHEK1		8	0.00184009	0.328137
1147	CHUK		22	0.0100822	0.354185
1163	CKS1B	DE_Genes	3	9.376e-05	0.28184
1173	AP2M1		4	0.00188132	0.267601
1263	PLK3		4	0.00111973	0.309694
1326	MAP3K8	DE_Genes	9	0.00245968	0.325664
1385	CREB1		10	0.00352391	0.323483
1387	CREBBP		64	0.0604125	0.397771
1400	CRMP1		5	0.0006194	0.282519
1410	CRYAB	DE_Genes	2	0.00083964	0.238732
1432	MAPK14		20	0.0163332	0.319455
1434	CSE1L	DE_Genes	4	0.00153377	0.255524
1439	CSF2RB		6	0.00066331	0.287063
1445	CSK		11	0.00333078	0.324122
1459	CSNK2A2	DE_Genes	27	0.0345549	0.362953
1487	CTBP1		7	0.00169602	0.320453
1488	CTBP2		5	0.00153219	0.302617
1495	CTNNA1		7	0.00066205	0.284477
1499	CTNNB1		34	0.0337903	0.362953
1500	CTNND1		4	0.00019384	0.27495
1523	CUX1		4	0.00078444	0.301727
1540	CYLD	DE_Genes	4	0.000112	0.281937
1601	DAB2		8	0.00125053	0.308879
1616	DAXX		17	0.00844106	0.353727
1647	GADD45A	DE_Genes	4	0.00029783	0.288881
1786	DNMT1	DE_Genes	11	0.00104623	0.303064
1788	DNMT3A		10	0.00129715	0.299635
1789	DNMT3B	DE_Genes	10	0.00300195	0.291445
1820	ARID3A	DE_Genes	2	7.88e-05	0.258014
1831	TSC22D3	DE_Genes	6	0.00204629	0.309111
1832	DSP		4	0.00028061	0.25842
1838	DTNB		3	0.00066848	0.275596
1845	DUSP3	DE_Genes	2	9.49e-06	0.276059
1846	DUSP4	DE_Genes	3	3.731e-05	0.272848
1847	DUSP5	DE_Genes	1	0	0.259236
1854	DUT		2	0.0001126	0.234304
1855	DVL1		8	0.00145865	0.31193
1856	DVL2		13	0.0155532	0.338417
1857	DVL3		7	0.00271953	0.306229
1869	E2F1	DE_Genes	17	0.00621633	0.327483
1875	E2F5	DE_Genes	2	1.225e-05	0.252771
1880	GPR183	DE_Genes	1	0	0.243692
1915	EEF1A1		8	0.00120483	0.28428
1937	EEF1G		8	0.00267891	0.287264
1956	EGFR		30	0.0276933	0.346121
2002	ELK1		6	0.00249779	0.306572
2026	ENO2		5	0.00218227	0.259646
2033	EP300		72	0.0698631	0.391885
2058	EPRS	DE_Genes	2	0.00116873	0.26918
2063	NR2F6	DE_Genes	4	2.381e-05	0.284477
2065	ERBB3		3	0.00021628	0.272848
2071	ERCC3		4	0.00057211	0.30726
2079	ERH	DE_Genes	5	0.00121433	0.310045
2081	ERN1		6	0.00207613	0.308415
2101	ESRRA		4	0.00090292	0.258257
2113	ETS1		7	0.00147518	0.319953
2130	EWSR1		16	0.0143927	0.331985
2131	EXT1	DE_Genes	1	0	0.220225
2149	F2R	DE_Genes	3	3.893e-05	0.230359
2175	FANCA		4	0.00032632	0.301506
2185	PTK2B		14	0.00281933	0.300843
2194	FASN	DE_Genes	15	0.00838398	0.321205
2237	FEN1		8	0.00180604	0.306115
2258	FGF13		5	0.00603798	0.269004
2268	FGR		5	0.00022264	0.271854
2274	FHL2		3	0.00117656	0.288983
2305	FOXM1	DE_Genes	3	0.00011993	0.296069
2308	FOXO1		8	0.00111748	0.324122
2309	FOXO3		5	0.0006936	0.309111
2314	FLII	DE_Genes	3	0.00026565	0.246769
2332	FMR1		3	0.00161636	0.27303
2353	FOS		15	0.00311184	0.331985
2355	FOSL2	DE_Genes	1	0	0.270422
2494	NR5A2	DE_Genes	6	0.00107135	0.268564
2534	FYN		19	0.00710177	0.334556
2547	XRCC6		19	0.00862354	0.338696
2580	GAK		4	0.00024605	0.255524
2648	KAT2A	DE_Genes	4	0.00092037	0.284971
2768	GNA12		5	0.00170757	0.285963
2771	GNAI2		3	0.0007643	0.244928
2801	GOLGA2		4	0.00034242	0.247215
2804	GOLGB1	DE_Genes	2	6.558e-05	0.230488
2872	MKNK2	DE_Genes	2	0	0.275503
2908	NR3C1	DE_Genes	38	0.0331361	0.376951
2932	GSK3B		15	0.00721777	0.341799
2935	GSPT1		3	0.00044508	0.256482
2956	MSH6	DE_Genes	3	7.661e-05	0.296283
2960	GTF2E1		6	0.00023274	0.264924
2962	GTF2F1		6	0.00087639	0.284477
2963	GTF2F2	DE_Genes	6	0.00027753	0.290209
3014	H2AFX	DE_Genes	2	2.97e-06	0.246621
3055	HCK		5	0.00026857	0.271405
3059	HCLS1	DE_Genes	4	0.00076065	0.281937
3065	HDAC1		52	0.0537892	0.381506
3066	HDAC2	DE_Genes	29	0.0197104	0.357267
3091	HIF1A		13	0.0063027	0.352815
3146	HMGB1	DE_Genes	12	0.00732572	0.337721
3148	HMGB2		2	3.402e-05	0.241542
3159	HMGA1	DE_Genes	6	0.00051345	0.310397
3172	HNF4A		17	0.00892244	0.340805
3174	HNF4G		4	6.181e-05	0.251455
3181	HNRNPA2B1		2	0.00033897	0.269534
3190	HNRNPK		11	0.00424309	0.298437
3191	HNRNPL		6	0.00114485	0.262888
3192	HNRNPU		4	0.0022358	0.299526
3205	HOXA9		3	0.00080588	0.292796
3219	HOXB9		3	0.00176103	0.293214
3265	HRAS		7	0.00480959	0.276524
3309	HSPA5		6	0.00184005	0.285367
3315	HSPB1		6	0.00407282	0.310985
3320	HSP90AA1		29	0.0276946	0.367502
3326	HSP90AB1		2	2.443e-05	0.273302
3398	ID2		6	0.00046063	0.287264
3476	IGBP1		3	0.00088924	0.253473
3480	IGF1R		6	0.00063223	0.281357
3486	IGFBP3		3	0.00023666	0.26874
3516	RBPJ		3	3.975e-05	0.258746
3551	IKBKB		17	0.00669548	0.349957
3621	ING1		14	0.00821167	0.352512
3654	IRAK1	DE_Genes	14	0.00789293	0.301063
3660	IRF2	DE_Genes	5	0.00256307	0.309928
3661	IRF3		3	0.00029646	0.303849
3665	IRF7		5	0.00390818	0.315042
3667	IRS1		9	0.00166373	0.312762
3716	JAK1		12	0.00332732	0.315405
3717	JAK2		7	0.00130541	0.299526
3725	JUN		46	0.0338179	0.370487
3727	JUND	DE_Genes	7	0.00037906	0.303961
3728	JUP		10	0.00291058	0.288576
3836	KPNA1		2	7.892e-05	0.257852
3875	KRT18		4	0.00045922	0.275134
3932	LCK		17	0.00734511	0.328795
4023	LPL		3	0.00038486	0.258501
4084	MXD1	DE_Genes	4	0.00279246	0.275134
4085	MAD2L1	DE_Genes	7	0.0007231	0.271315
4086	SMAD1	DE_Genes	11	0.00524002	0.321708
4087	SMAD2		27	0.0131196	0.372167
4088	SMAD3	DE_Genes	42	0.033945	0.385627
4090	SMAD5		5	0.00088324	0.264839
4092	SMAD7	DE_Genes	16	0.00652437	0.331449
4122	MAN2A2		3	0.00029852	0.259728
4149	MAX		13	0.0108284	0.312286
4170	MCL1	DE_Genes	9	0.00204616	0.26734
4175	MCM6		3	0.00013774	0.243403
4176	MCM7		9	0.00297258	0.287969
4188	MDFI		17	0.00982174	0.305204
4192	MDK		2	0.00012717	0.255684
4194	MDM4		11	0.00344508	0.350705
4208	MEF2C		7	0.00174553	0.306001
4215	MAP3K3		5	0.00108429	0.304412
4216	MAP3K4		8	0.00087057	0.273849
4217	MAP3K5		17	0.0111525	0.338417
4292	MLH1		6	0.00282162	0.293319
4294	MAP3K10		5	0.00199606	0.270511
4331	MNAT1	DE_Genes	11	0.00340451	0.323356
4335	MNT		3	0.00194276	0.261632
4436	MSH2	DE_Genes	6	0.00180533	0.294794
4591	TRIM37		11	0.00463269	0.298545
4601	MXI1	DE_Genes	3	0.00060967	0.244782
4602	MYB		6	0.00057012	0.308647
4605	MYBL2	DE_Genes	5	0.00250184	0.301616
4609	MYC	DE_Genes	30	0.0316936	0.362953
4615	MYD88		5	0.00049114	0.251763
4616	GADD45B		4	0.00029765	0.279347
4654	MYOD1		13	0.00338235	0.340099
4673	NAP1L1	DE_Genes	1	0	0.281647
4690	NCK1		9	0.00153016	0.300293
4691	NCL		12	0.0138566	0.330915
4692	NDN	DE_Genes	3	0.00022756	0.306458
4738	NEDD8		7	0.0034303	0.313838
4739	NEDD9		14	0.00294301	0.313478
4751	NEK2	DE_Genes	2	0.00062073	0.274124
4772	NFATC1		2	0.00020221	0.286562
4780	NFE2L2		4	0.0002976	0.303737
4790	NFKB1		32	0.0136139	0.351606
4791	NFKB2		15	0.007137	0.320078
4792	NFKBIA		13	0.00517348	0.345976
4800	NFYA		4	0.00046611	0.314801
4841	NONO		5	0.00117817	0.284971
4851	NOTCH1		11	0.00314239	0.3284
4862	NPAS2		5	0.00034563	0.315527
4863	NPAT	DE_Genes	1	0	0.23908
4869	NPM1	DE_Genes	3	8.077e-05	0.308995
4982	TNFRSF11B	DE_Genes	1	0	0.211871
5036	PA2G4		4	0.00056487	0.286662
5087	PBX1	DE_Genes	2	6.47e-05	0.276152
5092	PCBD1		8	0.00157696	0.287969
5094	PCBP2		4	0.0004724	0.250076
5127	CDK16		2	5.56e-05	0.261882
5147	PDE6D		3	0.00173565	0.239498
5170	PDPK1		8	0.00148666	0.295536
5175	PECAM1		7	0.00137522	0.29898
5204	PFDN5		2	0.00243605	0.266558
5245	PHB		9	0.00135194	0.336613
5300	PIN1		13	0.0133294	0.360246
5327	PLAT		3	0.00012299	0.259482
5337	PLD1		5	0.00102751	0.272125
5338	PLD2		5	0.0015209	0.275781
5347	PLK1	DE_Genes	10	0.00584843	0.300843
5359	PLSCR1		17	0.0116153	0.298112
5366	PMAIP1	DE_Genes	3	0	0.251918
5451	POU2F1		10	0.00371128	0.314078
5452	POU2F2		5	0.00132063	0.290209
5464	PPA1	DE_Genes	4	0.00034294	0.308183
5465	PPARA		10	0.00189832	0.326961
5468	PPARG		15	0.00180449	0.310867
5495	PPM1B	DE_Genes	4	0.00025743	0.290106
5499	PPP1CA		7	0.00193528	0.270155
5511	PPP1R8		4	0.00056731	0.273575
5515	PPP2CA		9	0.00481724	0.315042
5518	PPP2R1A		4	0.00042202	0.283299
5519	PPP2R1B		5	0.0008075	0.298004
5531	PPP4C	DE_Genes	6	0.00234044	0.304187
5536	PPP5C		6	0.00197191	0.290722
5573	PRKAR1A		2	0.00048652	0.266299
5580	PRKCD		15	0.00576323	0.319455
5585	PKN1		12	0.00586946	0.320703
5590	PRKCZ		12	0.00865014	0.330249
5591	PRKDC		11	0.00399923	0.331048
5594	MAPK1		39	0.0426631	0.371661
5595	MAPK3	DE_Genes	24	0.015894	0.349808
5598	MAPK7		5	0.0003199	0.285069
5599	MAPK8		18	0.00899738	0.337999
5601	MAPK9	DE_Genes	7	0.00329805	0.317971
5605	MAP2K2	DE_Genes	3	0.00041384	0.27774
5606	MAP2K3	DE_Genes	5	0.00052026	0.284872
5608	MAP2K6	DE_Genes	5	0.00059915	0.284773
5610	EIF2AK2		9	0.00281485	0.334965
5629	PROX1	DE_Genes	3	0.00041881	0.285963
5631	PRPS1	DE_Genes	3	0.0002579	0.220462
5635	PRPSAP1		2	0.00022653	0.228436
5663	PSEN1		11	0.0033911	0.308415
5682	PSMA1		9	0.00427268	0.282422
5683	PSMA2	DE_Genes	3	0.00014368	0.240269
5685	PSMA4		3	0.00093324	0.273849
5688	PSMA7	DE_Genes	3	0.00070086	0.2706
5691	PSMB3	DE_Genes	1	0	0.231333
5693	PSMB5	DE_Genes	3	0.00055222	0.262552
5700	PSMC1		4	0.00127165	0.274032
5701	PSMC2		5	0.00217013	0.289901
5708	PSMD2		6	0.00132225	0.276059
5717	PSMD11		3	0.0002043	0.262217
5725	PTBP1	DE_Genes	5	0.00161784	0.25215
5747	PTK2		14	0.00564266	0.331985
5757	PTMA	DE_Genes	7	0.00197397	0.315527
5764	PTN		7	0.00112264	0.283201
5796	PTPRK		3	0.00015662	0.280684
5801	PTPRR	DE_Genes	3	0.00010402	0.277928
5859	QARS		3	0.00131191	0.279537
5861	RAB1A		5	0.00162232	0.277271
5868	RAB5A		5	0.00268133	0.255923
5879	RAC1		14	0.00721541	0.310867
5883	RAD9A		4	0.00079757	0.291032
5886	RAD23A		4	0.00290624	0.287969
5894	RAF1		25	0.019777	0.361038
5900	RALGDS		4	0.00033563	0.253552
5910	RAP1GDS1		4	0.00121954	0.249924
5916	RARG		7	0.00073225	0.278211
5917	RARS		2	5.053e-05	0.231594
5925	RB1		38	0.0275602	0.350705
5926	ARID4A	DE_Genes	3	5.093e-05	0.280396
5931	RBBP7		9	0.00319657	0.309694
5934	RBL2		12	0.0029485	0.31468
5970	RELA		47	0.0393962	0.376433
5971	RELB		9	0.00425482	0.294265
5978	REST		2	9.9e-06	0.221952
5979	RET		2	3.296e-05	0.280492
5987	TRIM27		6	0.00139492	0.29898
6045	RNF2		2	3.088e-05	0.220521
6103	RPGR		2	0.00015981	0.202067
6128	RPL6		3	0.00064755	0.25246
6130	RPL7A	DE_Genes	1	0	0.214921
6146	RPL22		2	4.377e-05	0.217541
6156	RPL30	DE_Genes	1	0	0.242541
6175	RPLP0	DE_Genes	1	0	0.214921
6188	RPS3	DE_Genes	2	0	0.278588
6194	RPS6	DE_Genes	1	0	0.214921
6195	RPS6KA1	DE_Genes	8	0.00320197	0.317602
6197	RPS6KA3		5	0.00067007	0.307952
6198	RPS6KB1		5	0.00085724	0.271585
6223	RPS19	DE_Genes	1	0	0.212035
6240	RRM1		3	6.89e-05	0.249544
6241	RRM2	DE_Genes	2	0.00072067	0.302952
6256	RXRA	DE_Genes	30	0.0149207	0.343658
6257	RXRB		7	0.00030129	0.27774
6282	S100A11	DE_Genes	1	0	0.248713
6314	ATXN7		3	0.00018135	0.243548
6383	SDC2		2	0.00013671	0.233305
6416	MAP2K4	DE_Genes	7	0.00123856	0.294688
6418	SET	DE_Genes	10	0.00527413	0.294476
6421	SFPQ		6	0.00264468	0.273941
6434	TRA2B		3	0.00033795	0.277084
6464	SHC1		14	0.00794321	0.318464
6497	SKI		7	0.00050134	0.304978
6500	SKP1		5	0.00125777	0.266818
6558	SLC12A2	DE_Genes	1	0	0.195105
6597	SMARCA4		19	0.00752147	0.342226
6598	SMARCB1		7	0.0026536	0.318711
6599	SMARCC1	DE_Genes	6	0.00051126	0.299854
6601	SMARCC2		2	0.00011568	0.245221
6605	SMARCE1	DE_Genes	5	0.00058396	0.288576
6612	SUMO3		7	0.00138355	0.300622
6617	SNAPC1		2	0.00010637	0.260304
6621	SNAPC4	DE_Genes	4	0.00069294	0.261882
6626	SNRPA	DE_Genes	2	0	0.222493
6642	SNX1		3	0.00049594	0.259072
6662	SOX9	DE_Genes	2	0.0005977	0.282519
6687	SPG7		3	0.00054413	0.259318
6689	SPIB	DE_Genes	5	0.00025328	0.305091
6720	SREBF1		4	0.00028606	0.302729
6721	SREBF2		8	0.00212407	0.325277
6722	SRF		9	0.0041267	0.31468
6741	SSB	DE_Genes	1	0	0.248713
6772	STAT1		14	0.00841322	0.340099
6774	STAT3		26	0.0162272	0.366845
6775	STAT4	DE_Genes	1	0	0.270422
6776	STAT5A		4	0.00022695	0.291859
6777	STAT5B		5	0.00076025	0.300953
6778	STAT6		5	0.00013799	0.305318
6780	STAU1	DE_Genes	9	0.00845241	0.273667
6790	AURKA	DE_Genes	5	0.00410024	0.308763
6794	STK11		4	0.00102347	0.312881
6810	STX4		2	7.498e-05	0.211217
6811	STX5		3	0.00154728	0.308415
6839	SUV39H1	DE_Genes	14	0.00291367	0.307376
6840	SVIL		2	0.00023768	0.275966
6872	TAF1		8	0.00069021	0.307952
6882	TAF11		3	5.902e-05	0.283397
6885	MAP3K7	DE_Genes	17	0.00377142	0.310749
6908	TBP		26	0.0147795	0.348768
6927	HNF1A	DE_Genes	6	0.00133008	0.319331
6934	TCF7L2	DE_Genes	9	0.00177793	0.319953
6945	MLX	DE_Genes	5	0.00293166	0.230748
6996	TDG		6	0.00048934	0.312167
7003	TEAD1	DE_Genes	3	0.00015668	0.260883
7011	TEP1	DE_Genes	1	0	0.301949
7026	NR2F2		4	0.00021634	0.296497
7027	TFDP1	DE_Genes	4	0.00129708	0.309461
7041	TGFB1I1		4	0.00031596	0.286562
7046	TGFBR1		12	0.00330914	0.308647
7048	TGFBR2		8	0.00109286	0.285466
7067	THRA		12	0.00134876	0.299854
7068	THRB	DE_Genes	11	0.00218405	0.329058
7074	TIAM1	DE_Genes	7	0.00246048	0.298545
7083	TK1		7	0.00188779	0.318094
7098	TLR3	DE_Genes	3	0.0002357	0.25184
7128	TNFAIP3		12	0.00482769	0.321457
7132	TNFRSF1A	DE_Genes	19	0.0135229	0.331717
7133	TNFRSF1B		3	0.00010261	0.253161
7150	TOP1		6	0.00366209	0.319083
7153	TOP2A	DE_Genes	8	0.0008676	0.336475
7155	TOP2B		5	0.00068316	0.319083
7157	TP53		95	0.180841	0.432333
7187	TRAF3		14	0.00155472	0.299963
7188	TRAF5	DE_Genes	12	0.0009122	0.288272
7189	TRAF6		35	0.0249048	0.334283
7249	TSC2		10	0.00499284	0.320828
7251	TSG101		8	0.00749392	0.332793
7277	TUBA4A	DE_Genes	3	0.00123913	0.270244
7283	TUBG1	DE_Genes	4	0.00079621	0.27449
7295	TXN		4	0.00048134	0.298004
7334	UBE2N		3	0.00053221	0.267427
7341	SUMO1		16	0.00517274	0.337721
7347	UCHL3	DE_Genes	1	0	0.238941
7376	NR1H2	DE_Genes	12	0.00322545	0.305887
7391	USF1		2	5.366e-05	0.254574
7409	VAV1		7	0.00175009	0.3034
7417	VDAC2	DE_Genes	1	0	0.235446
7430	EZR		5	0.00208606	0.287566
7431	VIM		16	0.0100182	0.316988
7454	WAS		7	0.00144553	0.292171
7486	WRN		6	0.00119901	0.309461
7514	XPO1		6	0.00111919	0.287566
7528	YY1		6	0.00192632	0.311693
7529	YWHAB		24	0.0149801	0.334283
7531	YWHAE		20	0.00707104	0.328926
7532	YWHAG		24	0.0157069	0.334283
7534	YWHAZ		19	0.01056	0.355565
7536	SF1		4	0.00065527	0.2698
7554	ZNF8	DE_Genes	2	0.00015296	0.280014
7709	ZBTB17		4	0.00047434	0.299744
7755	ZNF205		4	0.00057247	0.284477
7837	PXDN		12	0.00262314	0.300733
7867	MAPKAPK3	DE_Genes	1	0	0.242183
7874	USP7		8	0.00565214	0.337999
7936	RDBP		2	2.547e-05	0.239428
8061	FOSL1	DE_Genes	4	0.00080149	0.279442
8115	TCL1A		3	0.00267087	0.280972
8125	ANP32A		4	0.00023794	0.261132
8200	GDF5		2	8.916e-05	0.201078
8202	NCOA3	DE_Genes	21	0.013332	0.342511
8204	NRIP1	DE_Genes	19	0.0132641	0.342226
8295	TRRAP		7	0.00148273	0.284575
8312	AXIN1		8	0.00239011	0.300622
8313	AXIN2	DE_Genes	2	0	0.281068
8379	MAD1L1		7	0.00265574	0.294688
8431	NR0B2		11	0.00146099	0.284971
8440	NCK2		5	0.00221025	0.282908
8452	CUL3		4	0.0001021	0.263987
8454	CUL1		10	0.00190765	0.310397
8495	PPFIBP2	DE_Genes	2	0.00015352	0.263648
8502	PKP4	DE_Genes	4	0.00015546	0.250305
8507	ENC1	DE_Genes	1	0	0.259728
8517	IKBKG		22	0.0102204	0.33565
8518	IKBKAP		6	0.00096932	0.294582
8533	COPS3		4	0.00068979	0.279537
8535	CBX4	DE_Genes	4	0.00173008	0.270244
8554	PIAS1	DE_Genes	6	0.00289236	0.321331
8576	STK16		2	0.0002538	0.246547
8607	RUVBL1	DE_Genes	5	0.0007307	0.293844
8615	USO1		6	0.00141459	0.257367
8648	NCOA1	DE_Genes	24	0.00500114	0.337305
8678	BECN1	DE_Genes	1	0	0.249468
8682	PEA15	DE_Genes	8	0.00278865	0.303961
8717	TRADD		12	0.00505717	0.310514
8718	TNFRSF25		4	0.00115659	0.300953
8721	EDF1	DE_Genes	5	0.00028382	0.28078
8726	EED		7	0.00028994	0.285268
8737	RIPK1	DE_Genes	22	0.0125732	0.331717
8738	CRADD		4	0.00037434	0.268388
8741	TNFSF13	DE_Genes	6	0.00346944	0.26874
8751	ADAM15		3	0.00030885	0.265696
8764	TNFRSF14		5	0.00076835	0.279347
8767	RIPK2	DE_Genes	9	0.00113634	0.296711
8772	FADD	DE_Genes	13	0.0041309	0.30284
8773	SNAP23		2	0.00081156	0.237283
8792	TNFRSF11A	DE_Genes	6	0.00010677	0.2803
8795	TNFRSF10B	DE_Genes	5	2.861e-05	0.26604
8804	CREG1	DE_Genes	2	0	0.275042
8805	TRIM24	DE_Genes	5	0.00030736	0.288475
8812	CCNK		3	0.00020437	0.258095
8826	IQGAP1		4	0.00055684	0.289186
8837	CFLAR	DE_Genes	10	0.00285409	0.314319
8841	HDAC3		17	0.00619039	0.343084
8877	SPHK1	DE_Genes	1	0	0.267514
8878	SQSTM1	DE_Genes	9	0.00568786	0.288576
8881	CDC16	DE_Genes	7	0.0007491	0.289594
8930	MBD4		10	0.00593807	0.323356
9015	TAF1A	DE_Genes	3	0.00060939	0.312405
9020	MAP3K14		12	0.00274483	0.314319
9043	SPAG9		6	0.00123138	0.299089
9094	UNC119		15	0.00372999	0.293424
9111	NMI		6	0.00299661	0.296711
9112	MTA1		7	0.00305365	0.322087
9126	SMC3	DE_Genes	4	0.00122652	0.221055
9139	CBFA2T2		4	0.00077019	0.275966
9150	CTDP1	DE_Genes	4	0.00068835	0.281068
9156	EXO1	DE_Genes	2	2.199e-05	0.240199
9184	BUB3	DE_Genes	4	8.401e-05	0.282519
9188	DDX21	DE_Genes	1	0	0.270422
9231	DLG5		2	0.00011923	0.271854
9252	RPS6KA5	DE_Genes	4	0.00033702	0.304187
9261	MAPKAPK2		4	0.0007609	0.292796
9266	CYTH2	DE_Genes	4	0.00030611	0.241187
9295	SRSF11		2	0.00012594	0.250305
9319	TRIP13		15	0.00717086	0.290722
9325	TRIP4	DE_Genes	4	3.849e-05	0.299635
9361	LONP1	DE_Genes	8	0.00264075	0.29822
9413	FAM189A2	DE_Genes	2	0.00014272	0.246029
9439	MED23		2	4.6e-06	0.26734
9467	SH3BP5		3	0.00014066	0.262217
9491	PSMF1		6	0.00225725	0.286262
9513	FXR2	DE_Genes	23	0.020256	0.309928
9530	BAG4	DE_Genes	2	8.12e-06	0.249317
9531	BAG3		2	0.00029471	0.25418
9564	BCAR1		12	0.00194322	0.294899
9584	RBM39	DE_Genes	1	0	0.270422
9587	MAD2L1BP		8	0.0037418	0.318835
9610	RIN1		2	9.297e-05	0.222614
9611	NCOR1		17	0.00425807	0.306343
9618	TRAF4		3	0.00024494	0.261882
9637	FEZ2	DE_Genes	1	0	0.248336
9656	MDC1	DE_Genes	5	0.00387805	0.321079
9721	GPRIN2	DE_Genes	6	0.00147401	0.276991
9759	HDAC4		10	0.00223804	0.309228
9779	TBC1D5	DE_Genes	2	7.262e-05	0.21993
9833	MELK	DE_Genes	2	0.00020522	0.235042
9869	SETDB1		10	0.00173053	0.294476
9937	DCLRE1A	DE_Genes	1	0	0.243259
9968	MED12		3	6.817e-05	0.251609
9978	RBX1		5	0.00075129	0.290928
9982	FGFBP1	DE_Genes	1	0	0.212035
10010	TANK		63	0.0887202	0.365051
10014	HDAC5		9	0.00197891	0.300512
10018	BCL2L11		3	0.00010745	0.250764
10062	NR1H3		13	0.00256573	0.300733
10127	ZNF263		3	0.0003255	0.263057
10131	TRAP1	DE_Genes	3	0.00276469	0.282325
10140	TOB1		6	0.00134094	0.301174
10174	SORBS3		6	0.00140083	0.29416
10197	PSME3		6	0.0049666	0.324634
10241	CALCOCO2	DE_Genes	18	0.0164549	0.318711
10262	SF3B4		3	0.00016085	0.263902
10270	AKAP8		3	7.642e-05	0.257852
10273	STUB1		6	0.00048556	0.297033
10293	TRAIP	DE_Genes	4	0.00091711	0.269445
10302	SNAPC5		2	3.307e-05	0.235244
10313	RTN3		2	8.896e-05	0.248562
10318	TNIP1	DE_Genes	2	7.847e-05	0.284872
10370	CITED2	DE_Genes	2	0	0.294371
10393	ANAPC10	DE_Genes	5	0.00067698	0.290619
10399	GNB2L1		10	0.00340594	0.315163
10401	PIAS3		6	0.00039288	0.318464
10403	NDC80		5	0.00105205	0.254337
10413	YAP1		3	0.00016491	0.273849
10419	PRMT5		3	8.942e-05	0.246325
10438	C1D		10	0.00380006	0.288983
10471	PFDN6	DE_Genes	1	0	0.210513
10498	CARM1	DE_Genes	4	2.67e-06	0.306229
10519	CIB1		6	0.00076344	0.287364
10521	DDX17		6	0.0025866	0.312405
10524	KAT5		12	0.00575185	0.336475
10567	RABAC1		10	0.00399923	0.284872
10608	MXD4	DE_Genes	2	0.00054007	0.240269
10628	TXNIP	DE_Genes	2	7.923e-05	0.280396
10657	KHDRBS1		5	0.00069217	0.301174
10672	GNA13	DE_Genes	6	0.00265659	0.270422
10673	TNFSF13B		3	1.244e-05	0.228119
10728	PTGES3	DE_Genes	4	0.00208408	0.289492
10758	TRAF3IP2		5	0.00079865	0.284773
10771	ZMYND11		3	0.00135184	0.302617
10848	PPP1R13L	DE_Genes	2	5.217e-05	0.314078
10856	RUVBL2	DE_Genes	4	0.00265337	0.294794
10912	GADD45G		9	0.0027661	0.304751
10923	SUB1		2	2.181e-05	0.285168
10928	RALBP1		4	0.00092547	0.269357
10933	MORF4L1		2	0.00011961	0.264242
10951	CBX1		8	0.00096651	0.268125
10957	PNRC1		4	0.00012181	0.259318
10971	YWHAQ		11	0.00333682	0.308299
10980	COPS6		9	0.00436059	0.29898
10987	COPS5		9	0.00356671	0.327222
11007	CCDC85B		20	0.0116813	0.311693
11035	RIPK3	DE_Genes	3	0	0.283103
11043	MID2		2	0.0001213	0.224932
11065	UBE2C		2	9.033e-05	0.219636
11073	TOPBP1		5	0.00032671	0.272215
11140	CDC37		6	0.00067309	0.296283
11143	KAT7		4	0.00063796	0.267776
11161	C14orf1		8	0.00119593	0.285168
11184	MAP4K1		4	0.00037388	0.27449
11186	RASSF1		5	0.00151249	0.276152
11200	CHEK2	DE_Genes	8	0.00173121	0.318835
11214	AKAP13		6	0.00108028	0.285069
11215	AKAP11		2	9.928e-05	0.259318
11221	DUSP10	DE_Genes	2	2.578e-05	0.265696
11266	DUSP12		7	0.00212209	0.295111
11335	CBX3		3	1.726e-05	0.244127
11338	U2AF2	DE_Genes	7	0.00201458	0.266126
11345	GABARAPL2	DE_Genes	5	0.0038622	0.254653
22820	COPG		2	0.00010383	0.231202
22877	MLXIP	DE_Genes	2	0.00119183	0.25246
22920	KIFAP3		3	0.00036701	0.222614
22927	HABP4	DE_Genes	9	0.00484933	0.324506
22934	RPIA	DE_Genes	6	0.00105724	0.261715
22938	SNW1		9	0.00203041	0.316988
22974	TPX2	DE_Genes	1	0	0.235987
22978	NT5C2	DE_Genes	4	0.00268873	0.243115
22981	NINL		4	0.00042372	0.267863
23054	NCOA6		17	0.00401848	0.329322
23099	ZBTB43	DE_Genes	4	0.00069699	0.281647
23118	TAB2	DE_Genes	7	0.0009623	0.299854
23139	MAST2		3	0.00243605	0.276152
23163	GGA3		2	0.00032647	0.253865
23186	RCOR1		3	0.00092593	0.266732
23192	ATG4B		3	9.453e-05	0.209546
23199	KIAA0182		2	0.0002211	0.264497
23309	SIN3B		4	0.00232321	0.281164
23411	SIRT1		6	0.00098932	0.321079
23421	ITGB3BP		5	0.00120389	0.290106
23429	RYBP		4	0.00100569	0.259154
23468	CBX5		8	0.0016529	0.286662
23474	ETHE1	DE_Genes	2	0.00015309	0.282811
23495	TNFRSF13B	DE_Genes	6	0.00196475	0.280109
23542	MAPK8IP2		6	0.0005873	0.268916
23582	CCNDBP1	DE_Genes	1	0	0.253083
23641	LDOC1		9	0.00245936	0.288678
23645	PPP1R15A	DE_Genes	5	0.00041913	0.2698
23647	ARFIP2		4	0.00062488	0.251532
23650	TRIM29	DE_Genes	7	0.0035297	0.273941
23741	EID1	DE_Genes	3	0.00024961	0.296176
25788	RAD54B		3	0.00011743	0.24048
25793	FBXO7		2	0.00011134	0.238871
25911	DPCD	DE_Genes	1	0	0.227739
25920	COBRA1	DE_Genes	3	0.00054312	0.272848
25942	SIN3A		18	0.01186	0.331583
25978	CHMP2B	DE_Genes	1	0	0.267514
25996	REXO2	DE_Genes	10	0.00667212	0.318959
26003	GORASP2		5	0.00239133	0.272757
26036	ZNF451		3	0.00077251	0.254416
26039	SS18L1	DE_Genes	3	0.00069292	0.295963
26040	SETBP1	DE_Genes	1	0	0.22755
26060	APPL1	DE_Genes	4	0.00223687	0.282908
26088	GGA1		2	0.00010515	0.2187
26133	TRPC4AP	DE_Genes	7	0.00010146	0.297248
26258	PLDN		4	0.00073005	0.244345
26271	FBXO5	DE_Genes	3	0.00027757	0.25084
26511	CHIC2	DE_Genes	3	0.00036051	0.250611
26574	AATF		4	0.000772	0.300183
26986	PABPC1		8	0.00474484	0.278967
26994	RNF11		5	0.00205392	0.268828
27043	PELP1		3	7.756e-05	0.301949
27044	SND1	DE_Genes	6	0.00087819	0.292067
27113	BBC3	DE_Genes	2	0	0.250611
27242	TNFRSF21	DE_Genes	1	0	0.237009
27257	LSM1		2	0.00026807	0.272667
27301	APEX2	DE_Genes	7	0.0019498	0.291756
27316	RBMX	DE_Genes	7	0.00172541	0.270957
27347	STK39		2	0.00243605	0.242326
27429	HTRA2		4	0.00063141	0.266818
28964	GIT1		3	0.00011842	0.263902
28996	HIPK2		11	0.00323779	0.341514
29028	ATAD2	DE_Genes	1	0	0.255207
29110	TBK1		8	0.00433279	0.315769
29882	ANAPC2	DE_Genes	5	0.00141029	0.259728
29883	CNOT7		6	0.00182543	0.283299
29904	EEF2K	DE_Genes	2	2.61e-05	0.245588
29911	HOOK2		4	0.0001822	0.239988
29950	SERTAD1	DE_Genes	3	0.00203976	0.292171
30008	EFEMP2		6	0.00532785	0.31958
50484	RRM2B	DE_Genes	2	0.00072067	0.302952
51085	MLXIPL	DE_Genes	1	0	0.187529
51100	SH3GLB1	DE_Genes	4	0.00257647	0.236463
51135	IRAK4		4	0.00027122	0.254574
51194	IPO11	DE_Genes	1	0	0.267514
51247	PAIP2		2	7.97e-05	0.233305
51324	SPG21		6	0.00425944	0.27495
51343	FZR1	DE_Genes	20	0.0150148	0.322467
51347	TAOK3	DE_Genes	2	0	0.271764
51366	UBR5	DE_Genes	5	0.00186323	0.276617
51434	ANAPC7	DE_Genes	5	0.00011198	0.258095
51465	UBE2J1	DE_Genes	1	0	0.226545
51499	TRIAP1	DE_Genes	1	0	0.301949
51534	VTA1		4	0.00051921	0.253005
51567	TDP2	DE_Genes	8	0.00180177	0.301506
51588	PIAS4	DE_Genes	7	0.00292655	0.31834
51608	GET4		4	0.00055426	0.281261
51631	LUC7L2		15	0.00912096	0.301063
51651	PTRH2	DE_Genes	1	0	0.221533
53615	MBD3	DE_Genes	3	0.00012586	0.279062
53826	FXYD6		5	0.00304221	0.309111
54476	RNF216		2	0.00012241	0.251147
54550	NECAB2		6	0.0009221	0.260718
54778	RNF111		2	1.267e-05	0.282131
54819	ZCCHC10		6	0.002501	0.324122
54825	CDHR2	DE_Genes	1	0	0.216451
54929	TMEM161A	DE_Genes	2	2.73e-06	0.235716
54973	CPSF3L		3	0.00018125	0.250611
55037	PTCD3		2	9.281e-05	0.245148
55093	WDYHV1		11	0.00456647	0.286662
55114	ARHGAP17		4	0.00129644	0.270689
55142	HAUS2	DE_Genes	1	0	0.236191
55145	THAP1		6	0.00103998	0.273849
55198	APPL2	DE_Genes	3	0.00021267	0.251532
55257	C20orf20	DE_Genes	8	0.00151267	0.285665
55367	PIDD		4	0.00052873	0.274582
55388	MCM10		6	0.00134542	0.272667
55437	STRADB	DE_Genes	4	0.00016215	0.27449
55578	FAM48A	DE_Genes	1	0	0.242183
55629	PNRC2	DE_Genes	4	0.00012181	0.259318
55662	HIF1AN		5	0.00191455	0.301949
55755	CDK5RAP2		4	0.00035047	0.269269
55791	LRIF1		17	0.0069034	0.299307
55914	ERBB2IP	DE_Genes	6	0.0012103	0.290209
55922	NKRF	DE_Genes	3	0	0.279442
55929	DMAP1		5	0.00026852	0.282519
55968	NSFL1C		2	0.00127303	0.255763
56474	CTPS2	DE_Genes	1	0	0.215712
56654	NPDC1		8	0.00243873	0.29311
56893	UBQLN4		4	0.00035422	0.278588
56904	SH3GLB2	DE_Genes	1	0	0.191286
57048	PLSCR3		3	0.0002506	0.258827
57088	PLSCR4		3	0.00010117	0.258991
57142	RTN4		4	0.00143805	0.273211
57161	PELI2	DE_Genes	2	0	0.231528
57542	KLHDC5		2	0.00013715	0.236599
57646	USP28	DE_Genes	1	0	0.243115
57658	CALCOCO1		3	0.00122276	0.285864
57708	MIER1	DE_Genes	1	0	0.276245
57761	TRIB3	DE_Genes	8	0.00262912	0.306687
58533	SNX6		5	0.00047041	0.270422
59307	SIGIRR		3	0.00079378	0.257125
60313	GPBP1L1		2	0.00015516	0.25769
60436	TGIF2	DE_Genes	2	3.714e-05	0.296711
60491	NIF3L1		9	0.0036853	0.295218
60626	RIC8A		2	6.847e-05	0.219754
64081	PBLD	DE_Genes	2	0.00010975	0.242756
64151	NCAPG	DE_Genes	1	0	0.225736
64326	RFWD2		3	0.00016242	0.312286
64343	AZI2	DE_Genes	1	0	0.240058
64682	ANAPC1	DE_Genes	1	0	0.226171
64750	SMURF2		8	0.00477917	0.317233
64754	SMYD3	DE_Genes	1	0	0.268828
64769	MEAF6		3	0.00053823	0.264583
79027	ZNF655		2	9.358e-05	0.245001
79050	NOC4L		4	0.00123219	0.255763
79085	SLC25A23	DE_Genes	1	0	0.266385
79155	TNIP2	DE_Genes	4	0	0.288171
79666	PLEKHF2		14	0.00919602	0.291238
79686	LINC00341	DE_Genes	3	0.00074418	0.245148
79720	VPS37B	DE_Genes	1	0	0.249772
79753	SNIP1		6	0.00123471	0.321582
79754	ASB13		2	6.821e-05	0.243982
79797	ZNF408		5	0.00064461	0.272305
79817	MOBKL2B	DE_Genes	1	0	0.195616
79873	NUDT18		9	0.00424796	0.290414
80028	FBXL18	DE_Genes	2	0.00019278	0.25418
80764	THAP7		5	0.00323661	0.285963
80824	DUSP16		5	0.00048771	0.283887
81565	NDEL1		2	4.16e-05	0.259975
81631	MAP1LC3B		3	0.00074418	0.245148
81928	CABLES2	DE_Genes	3	3.24e-05	0.306916
83640	FAM103A1		2	9.177e-05	0.238732
83737	ITCH		5	0.0006335	0.301395
83855	KLF16	DE_Genes	1	0	0.24909
83878	USHBP1		4	0.00108023	0.249772
84103	C4orf17		2	4.992e-05	0.236941
84312	BRMS1L		5	0.00229408	0.287566
84708	LNX1		15	0.00688655	0.303512
85302	FBF1		11	0.00925814	0.313958
90427	BMF		3	7.707e-05	0.224256
90441	ZNF622		2	0.00020708	0.234237
92610	TIFA		7	0.00124013	0.294582
92815	HIST3H2A	DE_Genes	1	0	0.219401
93649	MYOCD	DE_Genes	1	0	0.239428
96764	TGS1	DE_Genes	4	0.00026502	0.299854
112858	TP53RK	DE_Genes	2	0.00102274	0.314801
112950	MED8		3	0.00016638	0.255923
121441	NEDD1	DE_Genes	1	0	0.281647
133522	PPARGC1B	DE_Genes	1	0	0.254258
134728	IRAK1BP1	DE_Genes	1	0	0.231463
140735	DYNLL2		4	0.00125781	0.266213
153443	SRFBP1	DE_Genes	6	0.00152809	0.292483
203068	TUBB		3	0.00206945	0.255445
222389	BEND7		3	0.00013616	0.239638
222643	UNC5CL	DE_Genes	2	0	0.278588
359948	IRF2BP2		1	0	0.236668
541468	C1orf190		3	0.00020601	0.233371

## Sheet: Module_Network
GeneID	GeneID
2	3309
2	10438
19	1459
19	8772
25	867
25	1385
25	2547
25	3055
25	3716
25	4690
25	4739
25	5591
25	5883
25	5925
25	7157
25	55114
25	81928
60	4088
60	5879
60	6597
60	55257
86	396
86	2130
86	2314
86	4609
86	6597
86	8295
86	8607
86	55257
87	1495
87	5585
87	10062
90	4086
90	4090
90	8200
142	1026
142	2547
142	4605
142	4738
142	4790
142	5591
142	5970
142	6934
142	7157
142	9184
142	23054
163	701
163	1173
163	4292
163	7046
163	7048
163	55145
166	2960
166	3146
166	5970
166	51651
196	2033
196	2963
196	3320
196	4738
196	5925
196	5970
196	6597
196	6908
196	8204
207	331
207	572
207	1027
207	1147
207	1326
207	2033
207	2175
207	2308
207	2932
207	3320
207	3326
207	3551
207	3654
207	3667
207	4087
207	4088
207	4092
207	5170
207	5515
207	5585
207	5590
207	5894
207	6198
207	6416
207	7249
207	7534
207	8115
207	9261
207	57761
274	1523
274	4609
274	5338
274	5747
274	51100
306	7157
306	9094
311	2026
311	5359
328	2237
328	3091
328	3191
328	6418
328	7157
328	8125
329	836
329	840
329	842
329	2935
329	3728
329	8517
329	8767
329	10010
329	25793
329	27429
329	51465
330	836
330	840
330	842
330	10010
330	27429
331	332
331	836
331	840
331	1111
331	2935
331	6885
331	7189
331	23118
331	27429
331	55093
331	55437
331	140735
332	836
332	840
332	1019
332	7514
369	5605
369	7532
369	8533
375	1937
375	5337
375	5338
375	9266
375	22820
375	23163
375	23647
375	26088
382	408
382	409
382	5337
382	9266
382	23647
396	998
396	1027
396	2237
396	3728
396	5879
408	1445
408	1855
408	1856
408	5594
408	5595
408	5900
408	9266
408	23099
409	4217
409	5594
409	5900
409	6601
409	9266
409	112950
468	2963
468	3725
468	23641
468	55037
468	57761
546	1616
546	9759
546	51631
572	598
572	599
572	2130
572	4170
572	6195
572	7529
572	7531
572	7532
572	7534
572	9252
572	10971
572	25996
573	2908
573	5894
573	5925
573	10273
573	23645
578	581
578	598
578	4170
578	7157
578	7417
580	602
580	2130
580	2547
580	4436
580	7157
580	11143
580	28964
581	598
581	4170
581	5366
581	10971
581	51100
595	1019
595	1026
595	1027
595	2033
595	5925
595	6774
595	6872
595	7067
595	7068
595	7249
595	8202
595	8648
595	8841
595	9978
595	10270
595	23582
595	56654
598	841
598	842
598	3667
598	4170
598	5366
598	5499
598	5663
598	5883
598	7157
598	8678
598	8837
598	10018
598	27113
598	57142
599	5499
599	10018
599	90427
602	2353
602	2534
602	2932
602	3065
602	3725
602	4790
602	4791
602	6256
602	6908
602	8648
602	10987
604	2033
604	3725
604	3727
604	9611
604	9759
604	10014
604	25942
605	5971
608	7187
608	10010
608	10673
641	836
641	1111
641	2237
641	4292
641	6612
641	7157
641	7486
659	1410
659	8200
659	203068
688	1387
688	2033
688	4790
688	6418
694	3219
694	29883
695	857
695	867
695	1820
695	2130
695	3055
695	3716
695	7409
695	7454
695	9467
695	10657
695	55114
701	991
701	996
701	3065
701	8881
701	9184
701	51434
708	5580
708	5590
708	5594
708	5595
708	7529
708	22927
768	1495
768	1499
768	51343
811	2908
811	5327
811	10438
819	1956
819	23495
834	1956
834	8767
836	841
836	843
836	3059
836	4170
836	6721
836	7187
836	8615
836	8837
840	843
840	3309
840	7132
841	843
841	1147
841	2194
841	3551
841	7431
841	8682
841	8737
841	8772
841	8795
841	8837
841	9020
841	10010
841	10928
842	5594
843	7132
843	8772
843	8837
843	23429
857	1445
857	1956
857	5594
857	5595
857	5879
857	7046
857	7133
857	10010
867	1956
867	2185
867	2268
867	2534
867	3932
867	4851
867	7529
867	10971
867	83737
890	983
890	990
890	991
890	1017
890	1026
890	1027
890	1869
890	5934
890	7157
890	23421
891	899
891	983
891	993
891	1026
891	4616
891	7048
891	10912
891	10928
891	51343
894	1019
894	1020
894	1026
894	1027
894	10270
894	56654
898	983
898	993
898	1017
898	1026
898	2932
898	5300
898	5934
898	6597
898	6599
898	8452
900	2580
900	7157
939	7187
939	7188
939	10010
958	2547
958	7187
958	7188
958	7189
958	8767
958	10010
958	10758
958	51567
960	1956
960	2534
960	3486
960	3932
960	7046
960	7074
960	7430
983	1026
983	1033
983	1459
983	1523
983	1601
983	1647
983	2175
983	2237
983	2305
983	2534
983	4616
983	5518
983	5519
983	7157
983	10524
983	10912
983	25996
983	29883
983	55968
990	1017
990	4176
990	4609
991	996
991	3065
991	3066
991	4085
991	6790
991	8881
991	10393
991	11186
991	26271
991	29882
991	51434
991	64682
993	1017
993	1111
993	1956
993	4088
993	4217
993	5894
993	7529
993	7531
993	7534
993	9361
993	11200
994	1111
994	1432
994	1459
994	7529
994	7531
994	7534
994	9833
994	10971
996	4085
996	4087
996	4088
996	5300
996	5536
996	8881
996	10393
996	29882
996	51343
996	51434
998	4216
998	4294
998	5337
998	5585
998	7157
998	8826
998	9094
998	11161
998	55791
1003	1495
1003	1499
1003	3728
1003	6464
1003	7431
1003	8502
1017	1022
1017	1026
1017	1027
1017	1033
1017	1163
1017	2033
1017	2237
1017	2305
1017	4605
1017	4869
1017	5495
1017	5925
1017	5934
1017	7157
1017	29883
1017	56654
1019	1026
1019	1027
1019	4654
1019	5519
1019	5925
1019	9869
1019	11140
1019	29883
1019	29950
1019	51534
1020	2580
1020	5127
1020	5585
1020	7157
1020	81565
1020	81928
1022	1869
1022	2071
1022	4176
1022	4331
1022	7067
1026	1647
1026	4217
1026	5599
1026	5861
1026	6418
1026	6774
1026	7083
1026	7251
1026	9361
1026	10399
1026	10912
1026	11007
1026	51608
1027	1163
1027	7249
1027	7514
1027	7529
1027	7531
1027	10010
1027	10971
1027	10987
1051	1385
1051	1387
1051	1956
1051	2033
1051	2308
1051	2908
1051	3159
1051	3190
1051	4088
1051	4602
1051	4609
1051	4790
1051	5594
1051	5925
1051	5970
1051	6597
1051	6599
1051	6722
1051	9439
1108	3065
1108	5987
1108	6597
1111	2547
1111	3320
1111	4194
1111	7157
1147	1326
1147	1499
1147	3667
1147	4790
1147	4791
1147	4792
1147	5591
1147	5610
1147	5970
1147	6885
1147	7128
1147	8202
1147	8454
1147	8517
1147	8518
1147	9020
1147	10010
1147	10758
1147	11140
1147	26133
1163	11266
1173	1856
1173	9513
1173	9779
1263	7157
1263	9319
1263	10519
1263	11200
1326	4790
1326	4791
1326	5970
1326	6416
1326	9020
1326	10010
1326	79155
1385	1387
1385	2908
1385	5861
1385	6597
1385	7431
1385	9252
1385	10524
1385	11161
1387	1445
1387	1459
1387	1487
1387	1499
1387	1523
1387	1616
1387	1869
1387	2033
1387	2113
1387	2130
1387	2305
1387	2308
1387	2908
1387	2956
1387	3065
1387	3091
1387	3159
1387	3172
1387	3205
1387	3219
1387	3661
1387	3665
1387	3725
1387	4087
1387	4088
1387	4436
1387	4602
1387	4605
1387	4609
1387	4654
1387	4780
1387	4862
1387	5757
1387	5970
1387	6195
1387	6197
1387	6720
1387	6721
1387	6722
1387	6772
1387	6774
1387	6778
1387	6927
1387	6996
1387	7157
1387	8202
1387	8648
1387	8841
1387	9252
1387	9325
1387	10370
1387	10498
1387	10657
1387	23054
1387	26039
1387	27043
1387	27044
1387	28996
1387	29950
1387	79753
1387	96764
1400	2194
1400	3146
1400	7083
1400	7431
1400	9319
1410	3315
1432	1459
1432	1846
1432	2872
1432	4092
1432	4208
1432	5594
1432	5595
1432	5606
1432	5608
1432	7867
1432	8202
1432	9043
1432	9261
1432	11221
1432	11266
1432	27347
1432	27429
1432	55578
1432	80824
1434	3191
1434	5536
1434	6146
1434	51343
1439	3716
1439	3717
1439	4085
1439	6464
1439	7534
1439	10399
1445	1601
1445	2534
1445	3190
1445	3480
1445	5175
1445	5747
1445	6464
1445	7837
1459	1855
1459	1857
1459	2258
1459	2353
1459	3059
1459	3065
1459	3066
1459	3181
1459	3320
1459	3660
1459	3725
1459	4691
1459	5300
1459	5685
1459	5970
1459	6689
1459	6722
1459	7150
1459	7454
1459	7529
1459	8841
1459	9150
1487	1488
1487	2033
1487	3065
1487	3066
1487	8204
1487	8535
1488	2033
1488	8204
1488	8535
1488	9491
1495	1499
1495	3728
1495	5663
1495	51343
1499	1855
1499	1857
1499	1956
1499	2033
1499	2274
1499	2534
1499	2932
1499	3551
1499	4087
1499	4088
1499	4092
1499	5175
1499	5300
1499	5347
1499	5663
1499	5796
1499	6256
1499	6597
1499	6934
1499	7048
1499	7430
1499	8312
1499	8313
1499	8607
1499	8826
1499	9231
1499	10856
1499	51343
1499	79085
1500	1956
1500	5663
1500	51343
1500	55914
1523	5925
1540	7189
1540	8517
1540	10010
1540	10293
1601	2268
1601	4087
1601	4088
1601	5300
1601	7046
1601	7048
1616	1786
1616	2113
1616	2194
1616	3065
1616	3066
1616	4217
1616	6934
1616	7157
1616	7341
1616	7874
1616	8841
1616	11186
1616	22927
1616	28996
1616	55929
1647	4216
1647	6256
1786	1788
1786	1789
1786	3065
1786	3066
1786	5925
1786	5987
1786	6839
1786	8726
1786	10951
1786	55929
1788	1789
1788	3065
1788	4609
1788	6839
1788	7709
1788	8554
1788	8726
1788	9869
1788	10951
1789	3065
1789	3066
1789	6839
1789	7341
1789	8726
1789	10951
1789	23468
1789	64151
1820	1869
1831	2353
1831	3725
1831	4790
1831	4791
1831	5894
1831	79666
1832	3728
1832	5175
1832	7431
1832	8502
1838	8495
1838	10010
1838	11007
1845	5594
1845	5595
1846	5595
1846	5599
1847	5595
1854	2101
1854	79873
1855	1857
1855	4087
1855	4088
1855	4092
1855	8312
1856	5092
1856	7157
1856	8312
1856	9531
1856	10010
1856	10127
1856	10174
1856	11338
1856	55145
1856	79753
1856	92610
1857	8312
1857	8812
1857	79797
1857	84708
1869	2932
1869	4194
1869	4692
1869	4790
1869	5245
1869	5925
1869	7027
1869	8295
1869	8454
1869	10524
1869	11073
1869	23054
1869	56654
1875	5934
1875	7027
1880	9112
1915	2194
1915	4331
1915	8312
1915	8738
1915	9587
1915	10912
1915	54819
1915	84312
1937	2237
1937	7532
1937	8440
1937	10014
1937	51608
1937	55755
1937	57761
1956	2065
1956	2185
1956	4690
1956	5338
1956	5359
1956	5573
1956	5747
1956	6464
1956	6642
1956	6772
1956	6774
1956	6776
1956	6777
1956	7409
1956	7534
1956	8440
1956	8737
1956	9020
1956	11184
1956	51343
1956	58533
2002	2033
2002	5594
2002	5595
2002	5599
2002	6722
2002	8576
2026	7277
2026	11065
2026	22927
2026	59307
2033	2113
2033	2237
2033	2309
2033	2956
2033	3091
2033	3192
2033	3621
2033	3660
2033	3661
2033	3665
2033	3725
2033	4086
2033	4087
2033	4088
2033	4092
2033	4194
2033	4208
2033	4602
2033	4605
2033	4609
2033	4654
2033	4673
2033	4772
2033	4851
2033	4862
2033	5465
2033	5629
2033	5757
2033	5970
2033	6662
2033	6721
2033	6772
2033	6774
2033	6778
2033	6927
2033	6934
2033	6996
2033	7157
2033	7251
2033	7528
2033	7709
2033	8202
2033	8648
2033	9252
2033	9325
2033	9656
2033	10370
2033	10401
2033	10498
2033	10923
2033	10980
2033	22938
2033	23054
2033	23741
2033	26039
2033	27043
2033	57658
2033	79753
2033	96764
2033	121441
2058	3320
2058	5917
2063	2908
2063	7026
2063	7068
2063	8648
2065	5036
2065	6464
2071	2960
2071	4331
2071	7157
2079	7157
2079	9094
2079	9150
2079	9869
2079	10980
2081	3309
2081	3320
2081	4217
2081	5663
2081	10010
2081	51347
2101	5629
2101	8202
2101	8431
2113	3725
2113	5598
2113	9611
2113	51567
2130	2185
2130	2194
2130	3159
2130	4188
2130	4591
2130	5359
2130	5886
2130	7536
2130	22981
2130	60313
2130	140735
2131	10131
2149	2768
2149	6642
2149	10672
2175	3551
2175	6597
2185	2534
2185	3716
2185	3717
2185	3932
2185	4739
2185	5580
2185	7041
2185	7409
2185	7837
2185	9564
2185	10672
2194	2534
2194	3932
2194	7341
2194	7430
2194	8737
2194	8741
2194	8772
2194	11161
2194	55791
2194	85302
2237	7486
2258	6128
2258	6223
2258	6383
2258	9982
2268	3059
2268	5747
2268	7454
2274	6421
2274	7189
2308	3172
2308	4088
2308	7532
2308	7534
2308	23411
2309	4088
2309	7376
2309	7534
2309	10062
2314	4615
2314	10293
2332	4691
2332	6780
2332	9513
2353	2963
2353	3725
2353	3727
2353	4088
2353	5594
2353	5970
2353	6612
2353	6872
2353	6908
2353	6927
2353	8648
2353	25920
2355	3725
2494	8204
2494	8431
2494	8721
2494	10957
2494	55629
2494	85302
2534	2908
2534	3320
2534	4739
2534	5175
2534	5747
2534	7454
2534	7837
2534	8751
2534	9094
2534	9564
2534	10399
2547	2648
2547	4851
2547	5175
2547	5451
2547	5452
2547	5591
2547	6934
2547	7157
2547	7409
2547	7486
2547	7534
2547	23054
2547	23199
2547	23468
2580	8312
2580	8615
2648	4609
2648	6314
2648	8295
2768	3320
2768	5536
2768	11214
2768	51343
2771	4188
2771	5359
2771	60626
2801	5861
2801	8615
2801	23650
2801	26003
2804	8615
2804	84312
2872	5594
2908	3192
2908	3320
2908	3725
2908	3932
2908	4088
2908	4691
2908	4790
2908	4791
2908	5087
2908	5451
2908	5452
2908	5894
2908	5970
2908	6597
2908	6599
2908	6605
2908	6774
2908	6777
2908	6908
2908	7026
2908	7041
2908	7157
2908	7251
2908	7295
2908	8204
2908	8648
2908	8805
2908	9611
2908	10728
2908	23054
2908	25996
2932	4609
2932	4790
2932	4851
2932	5663
2932	5747
2932	7157
2932	7249
2932	8312
2932	8313
2932	11215
2935	26986
2956	4436
2960	2963
2960	6908
2960	8805
2960	27044
2962	4609
2962	5701
2962	5764
2962	6722
2962	6872
2962	9150
2963	3725
2963	6908
3014	7486
3014	9656
3055	7454
3055	9094
3055	9564
3059	11184
3065	3066
3065	3091
3065	3621
3065	4087
3065	4654
3065	4790
3065	4792
3065	5245
3065	5519
3065	5757
3065	5883
3065	5925
3065	5926
3065	5931
3065	5934
3065	5970
3065	5987
3065	6774
3065	6839
3065	7026
3065	7153
3065	7155
3065	7157
3065	8379
3065	8726
3065	9112
3065	9184
3065	10521
3065	10524
3065	10628
3065	10771
3065	10856
3065	23309
3065	25942
3065	51343
3065	51588
3065	53615
3065	55662
3065	57708
3065	60436
3065	84312
3066	3621
3066	4084
3066	5036
3066	5511
3066	5757
3066	5931
3066	5970
3066	6774
3066	6839
3066	7153
3066	7157
3066	7528
3066	8379
3066	8726
3066	9112
3066	9184
3066	9869
3066	22938
3066	23186
3066	25942
3066	51343
3066	55662
3091	3320
3091	3725
3091	4149
3091	5688
3091	6774
3091	7157
3091	8648
3091	9112
3091	55662
3146	3190
3146	4790
3146	5327
3146	5925
3146	5970
3146	6908
3146	7157
3146	9094
3146	11161
3146	55791
3148	5452
3148	6418
3159	3725
3159	4800
3159	5468
3172	4088
3172	5629
3172	6721
3172	7157
3172	8204
3172	8431
3172	8648
3172	8930
3172	10923
3172	10957
3172	10987
3172	23054
3172	23411
3172	55629
3172	133522
3174	8431
3174	10957
3174	10987
3174	55629
3181	3191
3190	3191
3190	5094
3190	7409
3190	8440
3190	10174
3190	10657
3190	27316
3190	56654
3191	5094
3191	5725
3192	4692
3192	6780
3205	5087
3205	5359
3219	4188
3265	5147
3265	5894
3265	5900
3265	5910
3265	7074
3265	9610
3265	11186
3309	7529
3309	9564
3309	10197
3315	5464
3315	7041
3315	7157
3315	9261
3315	55791
3320	3932
3320	4215
3320	4609
3320	4654
3320	4862
3320	5465
3320	5536
3320	5610
3320	5894
3320	6774
3320	6840
3320	7157
3320	8737
3320	9361
3320	10273
3320	10728
3320	11140
3320	27257
3320	64754
3326	7529
3398	4654
3398	4739
3398	5934
3398	6934
3398	9094
3398	55791
3476	5515
3476	5531
3476	11043
3480	3486
3480	3716
3480	7529
3480	7531
3480	10399
3486	6256
3516	4851
3516	22938
3516	27044
3551	3667
3551	4790
3551	4792
3551	5495
3551	5610
3551	5970
3551	6885
3551	7128
3551	7132
3551	8202
3551	8517
3551	10010
3551	26133
3621	5931
3621	7157
3621	7529
3621	7531
3621	7532
3621	7534
3621	10971
3621	25942
3621	25996
3621	55257
3621	55929
3654	3665
3654	4615
3654	5590
3654	6885
3654	7189
3654	8517
3654	8878
3654	23118
3654	51135
3654	57161
3654	59307
3654	92610
3654	134728
3660	4790
3660	5970
3660	359948
3661	29110
3665	4615
3665	7189
3667	3716
3667	5580
3667	5599
3667	7529
3667	7531
3716	5894
3716	6774
3716	6776
3716	7132
3716	10399
3716	10419
3717	5519
3717	5894
3717	6772
3717	7132
3717	10419
3725	4087
3725	4088
3725	4654
3725	4780
3725	4800
3725	5300
3725	5595
3725	5599
3725	5601
3725	5925
3725	5970
3725	6497
3725	6612
3725	6689
3725	6772
3725	6774
3725	6775
3725	6872
3725	6908
3725	7153
3725	7341
3725	8061
3725	8204
3725	8554
3725	8648
3725	8841
3725	9188
3725	9584
3725	10987
3725	25920
3725	64326
3725	83737
3727	4088
3727	5594
3727	5599
3727	10987
3727	64326
3728	5175
3728	5796
3728	6934
3728	51343
3728	55093
3836	6772
3836	51366
3875	7532
3875	8717
3875	11007
3875	23641
3932	4739
3932	4851
3932	5175
3932	5894
3932	7837
3932	8751
3932	8878
3932	9094
3932	9564
3932	10657
3932	55114
4023	10438
4023	10980
4023	51631
4084	4149
4084	9126
4084	25942
4085	8379
4085	8881
4085	9587
4085	29882
4086	4739
4086	5594
4086	10140
4086	10273
4086	28996
4086	51588
4086	55914
4086	64750
4086	79753
4087	4088
4087	4208
4087	4609
4087	4739
4087	6497
4087	7046
4087	7157
4087	8881
4087	10273
4087	10393
4087	10401
4087	22938
4087	28996
4087	51588
4087	55914
4087	64750
4087	79753
4087	153443
4088	4149
4088	4194
4088	4609
4088	4739
4088	4851
4088	5594
4088	6497
4088	6721
4088	7157
4088	7554
4088	8454
4088	8881
4088	9978
4088	10140
4088	10273
4088	10393
4088	10401
4088	22938
4088	51588
4088	54778
4088	55914
4088	60436
4088	64750
4088	153443
4090	6839
4090	7554
4090	10140
4090	64750
4092	5606
4092	5608
4092	6885
4092	7046
4092	7048
4092	10413
4092	51588
4092	54778
4092	55914
4092	64750
4092	153443
4122	7431
4122	8518
4122	51631
4149	4335
4149	4436
4149	4601
4149	4609
4149	7003
4149	8295
4149	8379
4149	9043
4149	10608
4149	79666
4170	5366
4170	10018
4170	27113
4170	90427
4175	4176
4175	5682
4175	55388
4176	4331
4176	5925
4176	5934
4176	6908
4176	10270
4176	55388
4188	5300
4188	6687
4188	7376
4188	7755
4188	9139
4188	9721
4188	10758
4188	26511
4188	54973
4188	55093
4188	55367
4188	56654
4188	79797
4188	80764
4192	4691
4192	10438
4194	7157
4194	7529
4194	7531
4194	7532
4194	7874
4194	11200
4194	25996
4208	5598
4208	7003
4208	9759
4208	10014
4215	7189
4215	7531
4215	7532
4215	9043
4216	4616
4216	5606
4216	5608
4216	5879
4216	6416
4216	10912
4217	4616
4217	5536
4217	5608
4217	5610
4217	5859
4217	5894
4217	6885
4217	7188
4217	7189
4217	7295
4217	7534
4217	10010
4292	4609
4292	8930
4292	9156
4292	23650
4294	6416
4294	7531
4294	22920
4294	23542
4331	5451
4331	5452
4331	5925
4331	7157
4331	9112
4331	10980
4331	55791
4335	6945
4335	25942
4436	9156
4436	11200
4591	7187
4591	7188
4591	7189
4591	9513
4591	9618
4591	10010
4591	27301
4591	55388
4591	79027
4591	79873
4601	9126
4601	23309
4602	4691
4602	27044
4602	28996
4605	90441
4609	5204
4609	5595
4609	5599
4609	5894
4609	5925
4609	5970
4609	6598
4609	6908
4609	7074
4609	7277
4609	7528
4609	7709
4609	8295
4609	9111
4609	10524
4615	7098
4615	51135
4654	5925
4654	6256
4654	6774
4654	6839
4654	6934
4654	7026
4690	4739
4690	5585
4690	7454
4690	7837
4690	9564
4690	11184
4690	29110
4691	4869
4691	5590
4691	6282
4691	6741
4691	6780
4691	7150
4691	7157
4692	7157
4738	5747
4738	7157
4738	7347
4738	8452
4738	8454
4739	5747
4739	7837
4739	9564
4739	51343
4739	83737
4751	5594
4751	10403
4772	9361
4780	5468
4780	5580
4790	4791
4790	4792
4790	4851
4790	5531
4790	5970
4790	5971
4790	6188
4790	6256
4790	6774
4790	6778
4790	7295
4790	8517
4790	8648
4790	9043
4790	23421
4790	55922
4790	79155
4790	222643
4791	5717
4791	5970
4791	5971
4791	6128
4791	6156
4791	8517
4791	9020
4791	55922
4791	79155
4792	5970
4792	6195
4792	6500
4792	7157
4792	7341
4792	8454
4792	8517
4792	8518
4792	8841
4800	6722
4800	7157
4841	5300
4841	6421
4841	8379
4841	9513
4841	79666
4851	5663
4851	5970
4851	83737
4862	6256
4862	8202
4863	5451
4869	7157
4982	8741
5036	5925
5036	25942
5092	6927
5092	9513
5092	26003
5092	55093
5092	60491
5092	79873
5092	84708
5094	5725
5094	26986
5127	7532
5147	5886
5147	6103
5170	5580
5170	5585
5170	5590
5170	5900
5170	6197
5170	6198
5170	10971
5204	10471
5245	5894
5245	5925
5245	5934
5245	6597
5245	7157
5245	9611
5245	25942
5300	5347
5300	7153
5300	7157
5300	10010
5300	54819
5327	10438
5337	5585
5337	8682
5338	5580
5338	8682
5347	5682
5347	5685
5347	5688
5347	5691
5347	5693
5347	7283
5347	11200
5347	51608
5359	6464
5359	6687
5359	7536
5359	9721
5359	30008
5359	54973
5359	56654
5359	57048
5359	57088
5359	79050
5359	80028
5359	83640
5451	5970
5451	6256
5451	6621
5451	6777
5451	6908
5451	7067
5452	6908
5464	7157
5464	9094
5464	9869
5465	5970
5465	6256
5465	8204
5465	8648
5465	9611
5465	10062
5465	10912
5465	11214
5468	6256
5468	6257
5468	8202
5468	8204
5468	8431
5468	8648
5468	8721
5468	8841
5468	8930
5468	9611
5468	10912
5468	10987
5468	23054
5495	6885
5495	8517
5499	5511
5499	5610
5499	6780
5499	11215
5499	23645
5511	8726
5511	11161
5515	5518
5515	5519
5515	5580
5515	5595
5515	5970
5515	7837
5515	9319
5518	5531
5518	8717
5531	5970
5531	7189
5531	8841
5536	10672
5573	79666
5580	6464
5580	6772
5580	6774
5580	7074
5580	7532
5580	7534
5580	10672
5580	57048
5585	5879
5585	5894
5585	7431
5585	7532
5585	11007
5590	5894
5590	5970
5590	7189
5590	7529
5590	8772
5590	8878
5590	9637
5591	5599
5591	7157
5591	7391
5591	7486
5591	10438
5591	10519
5591	23054
5594	5605
5594	5801
5594	5894
5594	6195
5594	6197
5594	6256
5594	6464
5594	6720
5594	6721
5594	6776
5594	7132
5594	7157
5594	7249
5594	7409
5594	8202
5594	8682
5594	8718
5594	9759
5594	10140
5594	10174
5594	10318
5594	11266
5594	51366
5594	80824
5595	5605
5595	5606
5595	5801
5595	5894
5595	6195
5595	6197
5595	6689
5595	6720
5595	6721
5595	7157
5595	8682
5595	9759
5595	11266
5598	5801
5598	5894
5598	7529
5599	6416
[truncated: 891 more rows]

## Sheet: Function_GO
Category	Term	Count	%	PValue	Genes	List Total	Pop Hits	Pop Total	Fold Enrichment	Bonferroni	Benjamini	FDR
GOTERM_BP_FAT	GO:0045449~regulation of transcription	311	37.8345	1.44051e-31	4208, 3725, 6774, 6775, 2002, 6772, 6621, 29028, 6872, 8125, 3727, 51085, 4615, 8737, 1820, 7068, 8878, 7067, 6497, 605, 604, 602, 6617, 57761, 1488, 1487, 6882, 3091, 25, 166, 25788, 3717, 133522, 9869, 4602, 4605, 10628, 8726, 4601, 546, 7341, 6777, 6776, 4791, 6601, 4790, 6778, 4792, 6605, 4609, 11335, 1432, 2314, 55922, 359948, 7041, 22927, 7334, 4090, 4780, 7046, 4092, 55662, 811, 2308, 2309…	770	869	3656	1.69925	4.84877e-28	4.84877e-28	2.62714e-28
GOTERM_BP_FAT	GO:0010604~positive regulation of macromolecule metabolic process	182	22.1411	5.33991e-30	3725, 4208, 8881, 688, 6774, 3148, 2149, 2002, 10401, 8741, 6872, 3480, 51085, 64682, 1387, 8878, 7068, 7067, 602, 6882, 3091, 1385, 207, 3717, 133522, 8312, 6777, 51434, 6776, 6601, 5451, 6778, 4790, 4792, 4609, 3219, 10524, 8554, 1432, 5970, 10273, 10673, 2071, 1786, 8764, 6500, 1789, 10014, 7189, 7041, 8648, 28996, 7334, 2274, 4800, 5347, 4090, 7046, 4780, 4092, 811, 10413, 595, 890, 2308, 230…	770	408	3656	2.118	1.79741e-26	8.98707e-27	9.73868e-27
GOTERM_BP_FAT	GO:0051252~regulation of RNA metabolic process	218	26.5207	5.63798e-24	3725, 4208, 6774, 6775, 6772, 2002, 6872, 3727, 51085, 1820, 7068, 8878, 7067, 6497, 604, 602, 1488, 1487, 3091, 25, 166, 133522, 4602, 546, 6777, 6776, 6601, 4791, 6778, 4790, 4792, 4609, 6605, 11335, 1432, 7041, 4090, 4780, 4092, 811, 2308, 2309, 5629, 51588, 2305, 53615, 10498, 1831, 2963, 55929, 10608, 8431, 4772, 6599, 6598, 6597, 5916, 4851, 8841, 7391, 2101, 10062, 7251, 4654, 79753, 9611,…	770	578	3656	1.79079	1.89774e-20	6.32581e-21	1.02823e-20
GOTERM_BP_FAT	GO:0006355~regulation of transcription, DNA-dependent	212	25.7908	7.84058e-24	3725, 4208, 6774, 6775, 6772, 2002, 6872, 3727, 51085, 1820, 7068, 8878, 7067, 6497, 604, 602, 1488, 1487, 3091, 25, 166, 133522, 4602, 546, 6777, 6776, 6601, 4791, 6778, 4790, 4792, 4609, 6605, 11335, 1432, 7041, 4090, 4780, 4092, 811, 2308, 2309, 5629, 51588, 2305, 53615, 10498, 1831, 2963, 55929, 10608, 8431, 4772, 6599, 6598, 6597, 5916, 4851, 8841, 7391, 2101, 10062, 7251, 4654, 79753, 9611,…	770	557	3656	1.80716	2.63914e-20	6.59785e-21	1.42993e-20
GOTERM_BP_FAT	GO:0010628~positive regulation of gene expression	125	15.2068	1.82508e-23	4208, 3725, 688, 6774, 3148, 2149, 2002, 6872, 51085, 1387, 7068, 8878, 7067, 602, 6882, 3091, 1385, 133522, 6777, 6776, 6601, 5451, 6778, 4790, 4792, 4609, 3219, 8554, 10524, 1432, 5970, 10673, 2071, 1786, 1789, 10014, 7041, 8648, 28996, 2274, 4800, 4090, 4780, 7046, 10413, 890, 2308, 2309, 5629, 90, 9759, 2963, 2962, 898, 6721, 29950, 6722, 9968, 1869, 6599, 7026, 6598, 6597, 5916, 4851, 3621, …	770	261	3656	2.27397	6.1432e-20	1.22864e-20	3.32849e-20
GOTERM_BP_FAT	GO:0031328~positive regulation of cellular biosynthetic process	137	16.6667	5.66454e-23	3725, 4208, 688, 6774, 3148, 2149, 2002, 6872, 51085, 3480, 1387, 8878, 7068, 7067, 602, 6882, 3091, 1385, 207, 3717, 133522, 6777, 6776, 6601, 5451, 6778, 4790, 4792, 4609, 3219, 8554, 10524, 1432, 19, 5970, 2071, 10014, 7189, 7041, 8648, 28996, 3320, 2274, 4800, 4090, 4780, 7046, 811, 10413, 890, 2308, 2309, 5629, 90, 9759, 3326, 2963, 2962, 2185, 898, 6721, 29950, 6722, 9968, 1869, 6599, 7026,…	770	302	3656	2.15392	1.90668e-19	3.17781e-20	1.03307e-19
GOTERM_BP_FAT	GO:0006357~regulation of transcription from RNA polymerase II promoter	149	18.1265	6.7893e-23	3725, 4208, 6774, 3148, 8535, 3146, 2002, 1108, 6872, 3727, 2648, 1523, 51085, 1387, 10923, 8878, 7068, 7067, 6497, 604, 602, 1487, 4194, 6689, 3091, 25, 1385, 166, 133522, 6777, 6776, 6601, 5451, 9439, 6778, 4790, 4792, 4609, 7554, 6605, 5931, 3219, 10524, 10174, 1432, 4188, 5970, 2071, 1786, 1788, 10014, 8648, 28996, 2274, 4800, 4090, 23429, 4092, 811, 10413, 7528, 2308, 112950, 2309, 5629, 975…	770	342	3656	2.0686	2.28528e-19	3.26468e-20	1.2382e-19
GOTERM_BP_FAT	GO:0051173~positive regulation of nitrogen compound metabolic process	135	16.4234	6.8241e-23	3725, 4208, 688, 6774, 3148, 2149, 2002, 8741, 6872, 51085, 3480, 1387, 8878, 7068, 7067, 602, 6882, 3091, 1385, 207, 3717, 133522, 6777, 6776, 6601, 5451, 6778, 4790, 4792, 4609, 3219, 8554, 10524, 1432, 19, 5970, 2071, 10014, 7041, 8648, 28996, 7334, 3320, 2274, 4800, 4090, 4780, 7046, 811, 10413, 890, 2308, 2309, 5629, 90, 9759, 3014, 3326, 2963, 2962, 898, 6721, 29950, 6722, 9968, 1869, 6599,…	770	296	3656	2.1655	2.29699e-19	2.87124e-20	1.24455e-19
GOTERM_BP_FAT	GO:0045935~positive regulation of nucleobase, nucleoside, nucleotide and nucleic acid metabolic process	130	15.8151	1.04759e-22	3725, 4208, 688, 6774, 3148, 2149, 2002, 8741, 6872, 51085, 3480, 1387, 7068, 8878, 7067, 602, 6882, 3091, 1385, 133522, 6777, 6776, 6601, 5451, 6778, 4790, 4792, 4609, 3219, 8554, 10524, 1432, 19, 5970, 2071, 10014, 7041, 8648, 28996, 7334, 2274, 4800, 4090, 4780, 7046, 811, 10413, 890, 2308, 2309, 5629, 90, 9759, 3014, 2963, 2962, 898, 6721, 29950, 6722, 9968, 1869, 6599, 7026, 6598, 6597, 6464…	770	281	3656	2.19661	3.5262e-19	3.918e-20	1.91055e-19
GOTERM_BP_FAT	GO:0009891~positive regulation of biosynthetic process	137	16.6667	1.79174e-22	3725, 4208, 688, 6774, 3148, 2149, 2002, 6872, 51085, 3480, 1387, 8878, 7068, 7067, 602, 6882, 3091, 1385, 207, 3717, 133522, 6777, 6776, 6601, 5451, 6778, 4790, 4792, 4609, 3219, 8554, 10524, 1432, 19, 5970, 2071, 10014, 7189, 7041, 8648, 28996, 3320, 2274, 4800, 4090, 4780, 7046, 811, 10413, 890, 2308, 2309, 5629, 90, 9759, 3326, 2963, 2962, 2185, 898, 6721, 29950, 6722, 9968, 1869, 6599, 7026,…	770	305	3656	2.13273	6.03099e-19	6.03099e-20	3.26769e-19
GOTERM_BP_FAT	GO:0045941~positive regulation of transcription	121	14.7202	1.94382e-22	4208, 3725, 688, 6774, 3148, 2149, 2002, 6872, 51085, 1387, 7068, 8878, 7067, 602, 6882, 3091, 1385, 133522, 6777, 6776, 6601, 5451, 6778, 4790, 4792, 4609, 3219, 8554, 10524, 1432, 5970, 2071, 10014, 7041, 8648, 28996, 2274, 4800, 4090, 4780, 7046, 10413, 890, 2308, 2309, 5629, 90, 9759, 2963, 2962, 898, 6721, 29950, 6722, 9968, 1869, 6599, 7026, 6598, 6597, 4851, 5916, 3621, 196, 641, 7391, 105…	770	254	3656	2.26187	6.54289e-19	5.94808e-20	3.54504e-19
GOTERM_BP_FAT	GO:0010557~positive regulation of macromolecule biosynthetic process	131	15.9367	4.67941e-22	3725, 4208, 688, 6774, 3148, 2149, 2002, 6872, 51085, 3480, 1387, 8878, 7068, 7067, 602, 6882, 3091, 1385, 207, 133522, 6777, 6776, 6601, 5451, 6778, 4790, 4792, 4609, 3219, 8554, 10524, 1432, 5970, 2071, 10014, 7189, 7041, 8648, 28996, 2274, 4800, 4090, 4780, 7046, 811, 10413, 890, 2308, 2309, 5629, 90, 9759, 2963, 2962, 2185, 898, 6721, 29950, 6722, 9968, 1869, 6599, 7026, 6598, 6597, 6464, 591…	770	288	3656	2.1597	1.57509e-18	1.31258e-19	8.5341e-19
GOTERM_BP_FAT	GO:0045893~positive regulation of transcription, DNA-dependent	106	12.8954	3.15824e-21	4208, 3725, 6774, 3148, 2149, 2002, 6872, 51085, 1387, 7068, 8878, 7067, 602, 3091, 1385, 133522, 6777, 6776, 5451, 6601, 4790, 6778, 4792, 4609, 3219, 8554, 10524, 1432, 5970, 2071, 10014, 7041, 8648, 28996, 2274, 4800, 4090, 4780, 10413, 2308, 2309, 5629, 9759, 2963, 898, 6721, 6722, 9968, 1869, 6599, 7026, 6598, 6597, 4851, 5916, 196, 1051, 7391, 6927, 6314, 2101, 10062, 6662, 4654, 1857, 5606…	770	214	3656	2.35184	1.06306e-17	8.17742e-19	5.75986e-18
GOTERM_BP_FAT	GO:0006350~transcription	242	29.4404	3.28412e-21	3725, 4208, 6774, 6775, 2002, 6772, 6621, 29028, 6872, 23650, 8125, 3727, 51085, 1820, 7068, 7067, 604, 602, 6617, 57761, 6882, 3091, 166, 133522, 9869, 4602, 4605, 10628, 8726, 4601, 6777, 6776, 4791, 6601, 6778, 4790, 4609, 11335, 5757, 2314, 55922, 359948, 7041, 22927, 4090, 4780, 4092, 55662, 328, 2308, 2309, 5629, 2305, 51588, 53615, 10498, 2963, 55929, 10608, 2962, 2960, 8431, 4772, 29950, …	770	695	3656	1.65328	1.10543e-17	7.89596e-19	5.98942e-18
GOTERM_BP_FAT	GO:0051254~positive regulation of RNA metabolic process	106	12.8954	7.82411e-21	4208, 3725, 6774, 3148, 2149, 2002, 6872, 51085, 1387, 7068, 8878, 7067, 602, 3091, 1385, 133522, 6777, 6776, 5451, 6601, 4790, 6778, 4792, 4609, 3219, 8554, 10524, 1432, 5970, 2071, 10014, 7041, 8648, 28996, 2274, 4800, 4090, 4780, 10413, 2308, 2309, 5629, 9759, 2963, 898, 6721, 6722, 9968, 1869, 6599, 7026, 6598, 6597, 4851, 5916, 196, 1051, 7391, 6927, 6314, 2101, 10062, 6662, 4654, 1857, 5606…	770	216	3656	2.33006	2.63359e-17	1.75573e-18	1.42692e-17
GOTERM_BP_FAT	GO:0010605~negative regulation of macromolecule metabolic process	159	19.3431	9.49925e-21	3725, 4208, 8881, 6774, 3148, 8535, 3146, 1523, 23468, 23309, 51085, 64682, 58533, 6418, 3486, 7068, 2956, 7067, 6497, 605, 604, 602, 1488, 1487, 4194, 4292, 4294, 166, 5036, 11007, 2, 1616, 8726, 7341, 51434, 6601, 5451, 4790, 7554, 4609, 6605, 5931, 11335, 10524, 10174, 4188, 5970, 1786, 1788, 55922, 6188, 6282, 1789, 10014, 6945, 28996, 3516, 23429, 4092, 811, 7529, 598, 5245, 5629, 4436, 9759…	770	391	3656	1.93079	3.19745e-17	1.9984e-18	1.73243e-17
GOTERM_BP_FAT	GO:0042981~regulation of apoptosis	161	19.5864	1.75105e-20	3725, 4208, 55437, 1410, 2149, 6772, 8535, 3146, 8741, 332, 3875, 8678, 330, 331, 10293, 8930, 3480, 4615, 8738, 8737, 3486, 8878, 2956, 8877, 604, 602, 4217, 7486, 4292, 7409, 4294, 3551, 25, 1385, 6885, 207, 5366, 939, 3717, 90427, 8682, 1616, 10628, 7074, 6777, 6776, 4790, 4792, 4609, 51100, 5970, 10673, 2071, 51499, 3315, 6188, 7189, 23421, 7188, 7187, 28996, 11035, 27113, 10018, 7046, 9231, …	770	400	3656	1.91109	5.89402e-17	3.46707e-18	3.19348e-17
GOTERM_BP_FAT	GO:0045944~positive regulation of transcription from RNA polymerase II promoter	91	11.0706	3.13094e-20	3725, 4208, 6721, 6722, 9968, 1869, 6774, 3148, 6598, 6597, 2002, 5916, 4851, 196, 6872, 51085, 1051, 6927, 7391, 1387, 6314, 7068, 8878, 7067, 2101, 10062, 4654, 6662, 602, 6257, 3091, 5925, 6256, 1385, 8061, 7132, 133522, 10370, 4088, 6777, 6776, 2113, 5451, 4790, 6778, 5591, 29883, 4792, 4609, 4086, 4087, 6934, 7003, 3219, 10524, 4331, 57658, 1432, 23054, 5087, 2033, 5970, 2071, 8204, 26574, 1…	770	174	3656	2.48318	1.05387e-16	5.85485e-18	5.71006e-17
GOTERM_BP_FAT	GO:0043067~regulation of programmed cell death	161	19.5864	5.80256e-20	3725, 4208, 55437, 1410, 2149, 6772, 8535, 3146, 8741, 332, 3875, 8678, 330, 331, 10293, 8930, 3480, 4615, 8738, 8737, 3486, 8878, 2956, 8877, 604, 602, 4217, 7486, 4292, 7409, 4294, 3551, 25, 1385, 6885, 207, 5366, 939, 3717, 90427, 8682, 1616, 10628, 7074, 6777, 6776, 4790, 4792, 4609, 51100, 5970, 10673, 2071, 51499, 3315, 6188, 7189, 23421, 7188, 7187, 28996, 11035, 27113, 10018, 7046, 9231, …	770	404	3656	1.89217	1.95314e-16	1.02797e-17	1.05825e-16
GOTERM_BP_FAT	GO:0010941~regulation of cell death	161	19.5864	1.04559e-19	3725, 4208, 55437, 1410, 2149, 6772, 8535, 3146, 8741, 332, 3875, 8678, 330, 331, 10293, 8930, 3480, 4615, 8738, 8737, 3486, 8878, 2956, 8877, 604, 602, 4217, 7486, 4292, 7409, 4294, 3551, 25, 1385, 6885, 207, 5366, 939, 3717, 90427, 8682, 1616, 10628, 7074, 6777, 6776, 4790, 4792, 4609, 51100, 5970, 10673, 2071, 51499, 3315, 6188, 7189, 23421, 7188, 7187, 28996, 11035, 27113, 10018, 7046, 9231, …	770	406	3656	1.88285	3.51946e-16	1.75973e-17	1.9069e-16
GOTERM_BP_FAT	GO:0051726~regulation of cell cycle	88	10.7056	9.34328e-16	29950, 3725, 8881, 1869, 6597, 7709, 7249, 332, 8841, 983, 641, 4616, 10393, 8877, 701, 578, 604, 9656, 5796, 11140, 5883, 581, 3398, 5925, 207, 8061, 836, 10370, 10912, 9587, 4751, 4088, 6777, 6776, 2113, 29882, 8295, 4085, 4609, 1459, 4331, 11200, 1432, 7514, 1956, 2071, 1027, 51499, 1026, 26574, 1033, 3172, 51343, 8812, 1647, 79027, 811, 595, 8379, 5300, 55145, 890, 11065, 4869, 5629, 4436, 10…	770	187	3656	2.23438	2.98961e-12	1.42331e-13	1.62093e-12
GOTERM_BP_FAT	GO:0007243~protein kinase cascade	89	10.8273	1.4475e-15	1410, 55437, 6774, 1147, 2149, 11221, 6775, 6772, 6464, 7249, 4616, 51085, 3480, 6416, 8737, 5585, 51135, 9043, 602, 4217, 5601, 79753, 92610, 2065, 9252, 5606, 4215, 4216, 4294, 23542, 3551, 5608, 6885, 3716, 207, 11184, 79155, 939, 3717, 1616, 6197, 6198, 5979, 80824, 10912, 2258, 9111, 6777, 6776, 5598, 4792, 4086, 5594, 6195, 8554, 3661, 8517, 5599, 1432, 8518, 1956, 4188, 9261, 2768, 10672, …	770	191	3656	2.21244	4.85811e-12	2.20823e-13	2.63123e-12
GOTERM_BP_FAT	GO:0051172~negative regulation of nitrogen compound metabolic process	111	13.5036	1.59969e-15	4208, 6774, 3148, 8535, 3146, 1523, 23468, 51085, 23309, 58533, 7068, 2956, 7067, 6497, 605, 604, 602, 1488, 1487, 4194, 4292, 4294, 166, 5036, 11007, 1616, 8726, 7341, 5451, 6601, 4790, 6605, 7554, 11335, 5931, 10524, 10174, 4188, 1786, 1788, 6188, 55922, 1789, 6282, 10014, 6945, 28996, 3516, 23429, 4092, 811, 7529, 5629, 5245, 4436, 9759, 51588, 53615, 55929, 10608, 990, 8431, 1869, 7026, 25920…	770	263	3656	2.00393	5.23181e-12	2.27485e-13	2.83107e-12
GOTERM_BP_FAT	GO:0045934~negative regulation of nucleobase, nucleoside, nucleotide and nucleic acid metabolic process	110	13.382	2.40578e-15	4208, 6774, 3148, 8535, 3146, 1523, 23468, 51085, 23309, 58533, 7068, 2956, 7067, 6497, 605, 604, 602, 1488, 1487, 4194, 4292, 4294, 166, 5036, 11007, 1616, 8726, 7341, 5451, 6601, 4790, 6605, 7554, 11335, 5931, 10524, 10174, 4188, 1786, 1788, 6188, 55922, 1789, 6282, 6945, 10014, 28996, 3516, 23429, 4092, 811, 7529, 5629, 5245, 4436, 9759, 51588, 53615, 55929, 10608, 990, 8431, 1869, 7026, 25920…	770	261	3656	2.00109	8.22142e-12	3.42504e-13	4.45199e-12
GOTERM_BP_FAT	GO:0016481~negative regulation of transcription	100	12.1655	5.26423e-15	4208, 3148, 6774, 3146, 8535, 1523, 51085, 23309, 23468, 58533, 7068, 7067, 6497, 605, 604, 602, 1488, 1487, 4194, 4294, 166, 5036, 11007, 1616, 8726, 7341, 5451, 6601, 4790, 6605, 7554, 11335, 5931, 10524, 10174, 4188, 1786, 1788, 55922, 1789, 6945, 10014, 28996, 3516, 23429, 4092, 811, 7529, 5629, 5245, 9759, 51588, 53615, 55929, 10608, 8431, 1869, 7026, 6597, 25920, 5916, 8841, 22938, 6927, 59…	770	230	3656	2.06437	1.7564e-11	7.02549e-13	9.51461e-12
GOTERM_BP_FAT	GO:0007242~intracellular signaling cascade	184	22.3844	4.1154e-14	55437, 1410, 6774, 3148, 6775, 2149, 6772, 10403, 8125, 8930, 4616, 6416, 3480, 51085, 8737, 8878, 2956, 7067, 8877, 9043, 9656, 602, 4217, 92610, 9252, 23647, 4292, 4215, 4216, 7409, 4294, 5170, 3551, 25, 6885, 3716, 207, 51366, 79155, 939, 3717, 133522, 1616, 80824, 10912, 7074, 6777, 6776, 4792, 10524, 8554, 1432, 4188, 19, 2768, 10672, 51499, 7189, 2771, 7041, 8648, 28996, 11035, 10010, 27113…	770	542	3656	1.61188	1.38643e-10	5.3324e-12	7.51177e-11
GOTERM_BP_FAT	GO:0010629~negative regulation of gene expression	105	12.7737	4.19475e-14	4208, 6774, 3148, 3146, 8535, 1523, 23468, 51085, 23309, 58533, 7068, 7067, 6497, 605, 604, 602, 1488, 1487, 4194, 4294, 166, 5036, 11007, 1616, 8726, 7341, 5451, 6601, 4790, 6605, 4609, 7554, 11335, 5931, 10524, 10174, 4188, 1786, 1788, 55922, 1789, 6945, 10014, 28996, 3516, 23429, 4092, 811, 7529, 598, 5629, 5245, 9759, 51588, 53615, 55929, 10608, 8431, 1869, 7026, 6597, 25920, 5916, 8841, 2293…	770	253	3656	1.97054	1.41259e-10	5.23181e-12	7.65388e-11
GOTERM_BP_FAT	GO:0044093~positive regulation of molecular function	112	13.6253	5.74271e-14	8881, 55437, 2149, 6772, 4616, 4615, 64682, 8737, 2956, 8877, 6497, 9043, 4217, 7486, 4216, 4294, 3091, 5170, 3551, 6885, 25, 207, 3717, 5366, 1616, 10912, 51434, 4609, 4188, 5970, 10672, 6188, 6500, 7189, 10014, 81565, 2771, 28996, 27113, 7334, 5347, 11345, 7048, 7046, 595, 7529, 2081, 4436, 9759, 10928, 26271, 996, 994, 5573, 991, 894, 2185, 891, 3932, 998, 842, 6598, 6597, 6464, 8767, 5682, 72…	770	278	3656	1.91288	1.93203e-10	6.90015e-12	1.04683e-10
GOTERM_BP_FAT	GO:0012501~programmed cell death	119	14.4769	1.18706e-13	3725, 4208, 2149, 6772, 8741, 332, 3875, 330, 331, 4616, 8738, 8737, 8878, 57761, 4217, 4194, 23645, 7409, 207, 90427, 5366, 939, 3717, 8682, 1616, 55367, 10912, 8312, 7074, 4790, 4792, 4609, 1434, 51100, 51499, 5610, 8764, 6188, 23421, 7189, 7188, 7187, 28996, 11035, 27113, 1647, 54476, 23429, 10018, 57142, 7529, 9618, 599, 2081, 598, 10519, 10313, 329, 2309, 4436, 4170, 1831, 2185, 7531, 3932, …	770	305	3656	1.85252	3.99486e-10	1.37754e-11	2.16449e-10
GOTERM_BP_FAT	GO:0051253~negative regulation of RNA metabolic process	80	9.73236	1.24194e-13	4208, 1869, 6774, 7026, 6597, 3146, 8535, 5916, 8841, 1523, 51085, 23468, 23309, 5987, 6497, 604, 7251, 6662, 1488, 1487, 9611, 580, 5926, 4194, 3398, 5925, 6256, 166, 5036, 1616, 23741, 10370, 5978, 4088, 6601, 5451, 4790, 6605, 23411, 7554, 4087, 11335, 5931, 10524, 10971, 3660, 25942, 10174, 4188, 1027, 1786, 1788, 8204, 1789, 1499, 10014, 5465, 6945, 6045, 28996, 3516, 23429, 10771, 4092, 811…	770	174	3656	2.18301	4.18171e-10	1.39391e-11	2.26574e-10
GOTERM_BP_FAT	GO:0031399~regulation of protein modification process	73	8.88078	1.78635e-13	3725, 8881, 10401, 5682, 5685, 5683, 983, 9491, 10393, 64682, 8737, 10197, 3486, 6418, 701, 5585, 578, 5580, 4217, 5708, 581, 5691, 4294, 5693, 5700, 5701, 11184, 3717, 1616, 5688, 5590, 8454, 8312, 51434, 29882, 4085, 5717, 8554, 1956, 4188, 10273, 5663, 1786, 8764, 1789, 6500, 3172, 51343, 7334, 5515, 5518, 5347, 7046, 4092, 595, 659, 5300, 7529, 3059, 11065, 9759, 51588, 857, 26271, 996, 1020,…	770	153	3656	2.26541	6.01285e-10	1.93963e-11	3.25784e-10
GOTERM_BP_FAT	GO:0007049~cell cycle	145	17.6399	1.89668e-13	7536, 55437, 8881, 332, 3875, 10403, 6872, 22974, 5536, 64682, 2956, 9656, 4194, 4292, 7283, 23645, 25, 1326, 25788, 207, 5036, 1616, 10628, 55198, 5934, 51434, 4609, 9156, 23582, 26060, 10270, 6500, 1647, 5347, 2175, 79027, 811, 595, 8379, 4175, 1263, 2081, 890, 4176, 90, 1111, 4436, 2305, 3014, 26271, 996, 2079, 899, 994, 993, 990, 9184, 991, 203068, 894, 891, 4772, 898, 2580, 1869, 6598, 64151…	770	401	3656	1.71688	6.38281e-10	1.99463e-11	3.45834e-10
GOTERM_BP_FAT	GO:0045892~negative regulation of transcription, DNA-dependent	78	9.48905	3.05728e-13	4208, 1869, 6774, 7026, 6597, 3146, 8535, 5916, 8841, 1523, 51085, 23468, 23309, 5987, 6497, 604, 7251, 6662, 1488, 1487, 9611, 5926, 4194, 3398, 5925, 6256, 166, 5036, 1616, 23741, 10370, 5978, 4088, 6601, 5451, 4790, 6605, 23411, 7554, 4087, 11335, 5931, 10524, 10971, 3660, 25942, 10174, 4188, 1027, 1786, 1788, 8204, 1789, 1499, 10014, 5465, 6945, 6045, 28996, 3516, 23429, 10771, 4092, 811, 562…	770	170	3656	2.17852	1.02917e-09	3.11871e-11	5.57621e-10
GOTERM_BP_FAT	GO:0006915~apoptosis	116	14.1119	4.17493e-13	4208, 3725, 2149, 6772, 8741, 332, 3875, 330, 331, 4616, 8738, 8737, 8878, 57761, 4217, 4194, 23645, 7409, 207, 90427, 5366, 939, 3717, 8682, 1616, 55367, 10912, 8312, 7074, 4790, 4792, 4609, 1434, 51100, 51499, 5610, 8764, 6188, 23421, 7189, 7188, 7187, 28996, 11035, 27113, 1647, 54476, 23429, 10018, 57142, 9618, 7529, 599, 2081, 598, 10519, 10313, 329, 2309, 4436, 4170, 1831, 2185, 7531, 3932, …	770	299	3656	1.84205	1.40512e-09	4.13269e-11	7.61313e-10
GOTERM_BP_FAT	GO:0031327~negative regulation of cellular biosynthetic process	108	13.1387	4.23765e-13	4208, 6774, 3148, 3146, 8535, 1523, 23468, 51085, 23309, 58533, 7068, 7067, 6497, 605, 604, 602, 1488, 1487, 4194, 4294, 166, 5036, 11007, 1616, 8726, 7341, 5451, 6601, 4790, 6605, 7554, 11335, 5931, 10524, 10174, 4188, 1786, 1788, 55922, 1789, 6282, 6945, 10014, 28996, 3516, 23429, 4092, 811, 7529, 5629, 5245, 9759, 51588, 53615, 55929, 10608, 990, 8431, 1869, 59307, 7026, 6597, 25920, 5916, 884…	770	271	3656	1.89221	1.42642e-09	4.07547e-11	7.7286e-10
GOTERM_BP_FAT	GO:0042127~regulation of cell proliferation	126	15.3285	7.41008e-13	1003, 3725, 7536, 688, 2149, 6772, 8741, 8678, 4615, 3480, 3486, 8877, 6497, 604, 1488, 10140, 1487, 4194, 3091, 23641, 3717, 10628, 4601, 8313, 6777, 6776, 6778, 4792, 4692, 4609, 4690, 9982, 5970, 10673, 5610, 8764, 6282, 7188, 7041, 2771, 28996, 8440, 2175, 7048, 7046, 22920, 9231, 811, 595, 1445, 694, 5764, 890, 598, 2308, 5629, 5245, 1111, 9759, 2305, 23495, 994, 10608, 990, 894, 2185, 83737…	770	337	3656	1.77524	2.49408e-09	6.928e-11	1.35133e-09
GOTERM_BP_FAT	GO:0010551~regulation of specific transcription from RNA polymerase II promoter	39	4.74453	1.01181e-12	4208, 6722, 10524, 3148, 6598, 6597, 4851, 6872, 8841, 1499, 10014, 5465, 7391, 6927, 51085, 3172, 7067, 7376, 10062, 4092, 9611, 9759, 1385, 6256, 5468, 166, 7157, 10370, 93649, 4088, 3065, 2113, 3066, 2547, 4790, 5591, 4792, 23411, 6934	770	60	3656	3.08623	3.40591e-09	9.20517e-11	1.84538e-09
GOTERM_BP_FAT	GO:0043085~positive regulation of catalytic activity	99	12.0438	1.03719e-12	8881, 55437, 2149, 6772, 4616, 64682, 8737, 8877, 2956, 9043, 7486, 4217, 4216, 4294, 3091, 5170, 6885, 25, 207, 3717, 5366, 1616, 10912, 51434, 4609, 4188, 10672, 6188, 6500, 7189, 81565, 2771, 27113, 7334, 5347, 11345, 7048, 7046, 595, 7529, 2081, 4436, 10928, 26271, 996, 994, 5573, 991, 894, 2185, 891, 3932, 998, 842, 6464, 5682, 7249, 5685, 983, 5683, 9491, 10393, 10197, 5585, 578, 10062, 570…	770	243	3656	1.93439	3.49112e-09	9.18715e-11	1.89154e-09
GOTERM_BP_FAT	GO:0010558~negative regulation of macromolecule biosynthetic process	107	13.017	1.13993e-12	4208, 6774, 3148, 3146, 8535, 1523, 23468, 51085, 23309, 58533, 7068, 7067, 6497, 605, 604, 602, 1488, 1487, 4194, 4294, 166, 5036, 11007, 1616, 8726, 7341, 5451, 6601, 4790, 6605, 7554, 11335, 5931, 10524, 10174, 4188, 1786, 1788, 55922, 1789, 6282, 6945, 10014, 28996, 3516, 23429, 4092, 811, 7529, 5629, 5245, 9759, 51588, 53615, 55929, 10608, 990, 8431, 1869, 59307, 7026, 6597, 25920, 5916, 884…	770	271	3656	1.87469	3.83716e-09	9.83887e-11	2.07904e-09
GOTERM_BP_FAT	GO:0008219~cell death	126	15.3285	1.21812e-12	3725, 4208, 2149, 6772, 8741, 332, 3875, 330, 331, 4616, 8738, 8737, 8878, 57761, 4217, 4194, 7409, 23645, 207, 90427, 5366, 939, 3717, 8682, 1616, 55367, 10912, 8312, 8313, 7074, 4790, 4792, 4609, 1434, 51100, 51499, 5610, 8764, 6188, 3315, 23421, 7189, 7188, 6687, 7187, 28996, 11035, 27113, 1647, 54476, 23429, 10018, 57142, 7529, 9618, 599, 2081, 598, 10519, 10313, 329, 2309, 4436, 4170, 1831, …	770	339	3656	1.76476	4.10025e-09	1.02506e-10	2.22158e-09
GOTERM_BP_FAT	GO:0032583~regulation of gene-specific transcription	45	5.47445	1.45884e-12	4208, 6722, 10524, 3148, 7026, 6598, 6597, 4851, 1027, 6872, 8841, 1499, 10014, 5465, 7391, 51085, 6927, 3172, 7067, 7376, 10062, 4092, 9611, 5629, 3091, 9759, 1385, 6256, 166, 5468, 7157, 10370, 2494, 93649, 4088, 3065, 2113, 3066, 2547, 4790, 5591, 4792, 23411, 6934, 4087	770	76	3656	2.81135	4.91043e-09	1.19767e-10	2.66055e-09
GOTERM_BP_FAT	GO:0016265~death	126	15.3285	1.5576e-12	3725, 4208, 2149, 6772, 8741, 332, 3875, 330, 331, 4616, 8738, 8737, 8878, 57761, 4217, 4194, 7409, 23645, 207, 90427, 5366, 939, 3717, 8682, 1616, 55367, 10912, 8312, 8313, 7074, 4790, 4792, 4609, 1434, 51100, 51499, 5610, 8764, 6188, 3315, 23421, 7189, 7188, 6687, 7187, 28996, 11035, 27113, 1647, 54476, 23429, 10018, 57142, 7529, 9618, 599, 2081, 598, 10519, 10313, 329, 2309, 4436, 4170, 1831, …	770	340	3656	1.75957	5.24303e-09	1.24834e-10	2.84076e-09
GOTERM_BP_FAT	GO:0009890~negative regulation of biosynthetic process	108	13.1387	2.98235e-12	4208, 6774, 3148, 3146, 8535, 1523, 23468, 51085, 23309, 58533, 7068, 7067, 6497, 605, 604, 602, 1488, 1487, 4194, 4294, 166, 5036, 11007, 1616, 8726, 7341, 5451, 6601, 4790, 6605, 7554, 11335, 5931, 10524, 10174, 4188, 1786, 1788, 55922, 1789, 6282, 6945, 10014, 28996, 3516, 23429, 4092, 811, 7529, 5629, 5245, 9759, 51588, 53615, 55929, 10608, 990, 8431, 1869, 59307, 7026, 6597, 25920, 5916, 884…	770	278	3656	1.84457	1.00387e-08	2.33459e-10	5.43915e-09
GOTERM_BP_FAT	GO:0043065~positive regulation of apoptosis	92	11.1922	4.54294e-12	843, 3725, 842, 841, 6772, 5916, 4851, 8741, 8767, 10293, 8930, 1051, 8738, 8772, 8837, 8737, 3486, 50484, 8878, 2956, 572, 578, 604, 602, 4217, 5601, 580, 4292, 581, 2908, 5883, 4294, 7409, 25, 6256, 5608, 834, 207, 8061, 836, 3717, 939, 5366, 1616, 10628, 8454, 8452, 7074, 4088, 2113, 5591, 5879, 4609, 6194, 5594, 8517, 11200, 5599, 51100, 2071, 5663, 1027, 1026, 960, 27429, 6188, 26574, 23421,…	770	224	3656	1.95009	1.52915e-08	3.47533e-10	8.28517e-09
GOTERM_BP_FAT	GO:0043068~positive regulation of programmed cell death	92	11.1922	6.14713e-12	843, 3725, 842, 841, 6772, 5916, 4851, 8741, 8767, 10293, 8930, 1051, 8738, 8772, 8837, 8737, 3486, 50484, 8878, 2956, 572, 578, 604, 602, 4217, 5601, 580, 4292, 581, 2908, 5883, 4294, 7409, 25, 6256, 5608, 834, 207, 8061, 836, 3717, 939, 5366, 1616, 10628, 8454, 8452, 7074, 4088, 2113, 5591, 5879, 4609, 6194, 5594, 8517, 11200, 5599, 51100, 2071, 5663, 1027, 1026, 960, 27429, 6188, 26574, 23421,…	770	225	3656	1.94143	2.06911e-08	4.59802e-10	1.12108e-08
GOTERM_BP_FAT	GO:0010942~positive regulation of cell death	92	11.1922	1.11528e-11	843, 3725, 842, 841, 6772, 5916, 4851, 8741, 8767, 10293, 8930, 1051, 8738, 8772, 8837, 8737, 3486, 50484, 8878, 2956, 572, 578, 604, 602, 4217, 5601, 580, 4292, 581, 2908, 5883, 4294, 7409, 25, 6256, 5608, 834, 207, 8061, 836, 3717, 939, 5366, 1616, 10628, 8454, 8452, 7074, 4088, 2113, 5591, 5879, 4609, 6194, 5594, 8517, 11200, 5599, 51100, 2071, 5663, 1027, 1026, 960, 27429, 6188, 26574, 23421,…	770	227	3656	1.92432	3.75401e-08	8.1609e-10	2.03399e-08
GOTERM_BP_FAT	GO:0019220~regulation of phosphate metabolic process	92	11.1922	1.99947e-11	3725, 29950, 55437, 2149, 6464, 7249, 641, 4616, 8737, 58533, 6314, 3486, 8877, 5585, 578, 9043, 5580, 57761, 4217, 580, 5606, 11140, 4216, 581, 4294, 5170, 5925, 5608, 6885, 1855, 207, 11184, 836, 3717, 1616, 5590, 80824, 10912, 8312, 4088, 5934, 29882, 5879, 8517, 4331, 4188, 1956, 5663, 1027, 1026, 8764, 7189, 1033, 2771, 3172, 1647, 8812, 5515, 5518, 8795, 8440, 7048, 3654, 7046, 4092, 659, 5…	770	229	3656	1.90751	6.73021e-08	1.43196e-09	3.64654e-08
GOTERM_BP_FAT	GO:0051174~regulation of phosphorus metabolic process	92	11.1922	1.99947e-11	3725, 29950, 55437, 2149, 6464, 7249, 641, 4616, 8737, 58533, 6314, 3486, 8877, 5585, 578, 9043, 5580, 57761, 4217, 580, 5606, 11140, 4216, 581, 4294, 5170, 5925, 5608, 6885, 1855, 207, 11184, 836, 3717, 1616, 5590, 80824, 10912, 8312, 4088, 5934, 29882, 5879, 8517, 4331, 4188, 1956, 5663, 1027, 1026, 8764, 7189, 1033, 2771, 3172, 1647, 8812, 5515, 5518, 8795, 8440, 7048, 3654, 7046, 4092, 659, 5…	770	229	3656	1.90751	6.73021e-08	1.43196e-09	3.64654e-08
GOTERM_BP_FAT	GO:0032268~regulation of cellular protein metabolic process	94	11.4355	4.74162e-11	3725, 8881, 10401, 5682, 6872, 5685, 5683, 983, 9491, 10393, 64682, 8737, 10197, 3486, 6418, 701, 5585, 578, 10062, 5580, 602, 4217, 5708, 581, 5691, 4294, 23645, 5693, 5700, 5701, 207, 11184, 5036, 3717, 1616, 2, 5688, 5590, 8454, 8312, 51434, 29882, 4790, 4085, 4792, 5594, 4690, 5717, 8554, 2033, 1956, 4188, 10273, 5663, 1786, 8764, 3315, 1789, 6500, 2872, 3172, 51343, 7334, 5515, 5518, 5347, 8…	770	239	3656	1.86743	1.59603e-07	3.32506e-09	8.64755e-08
GOTERM_BP_FAT	GO:0042325~regulation of phosphorylation	89	10.8273	5.23771e-11	29950, 3725, 55437, 2149, 6464, 7249, 641, 4616, 8737, 58533, 6314, 3486, 8877, 5585, 578, 9043, 5580, 57761, 4217, 580, 5606, 11140, 4216, 581, 4294, 5170, 5925, 5608, 6885, 1855, 207, 11184, 836, 3717, 1616, 5590, 80824, 10912, 8312, 5934, 29882, 5879, 8517, 4331, 4188, 1956, 5663, 1027, 1026, 8764, 7189, 1033, 2771, 3172, 1647, 8812, 5515, 5518, 8795, 8440, 7048, 3654, 7046, 4092, 659, 595, 11…	770	222	3656	1.9035	1.76301e-07	3.59799e-09	9.5523e-08
GOTERM_BP_FAT	GO:0006916~anti-apoptosis	55	6.691	7.09391e-11	4208, 55437, 1410, 3146, 8535, 8767, 332, 330, 8678, 331, 8841, 983, 3480, 4615, 1051, 8837, 8878, 8877, 573, 581, 3551, 3309, 207, 8682, 939, 10370, 5590, 7128, 6777, 6776, 4790, 4792, 4609, 6934, 9530, 9531, 51100, 5970, 2932, 10673, 5663, 51499, 3315, 26574, 7189, 3654, 7046, 599, 598, 2308, 4869, 4170, 396, 7534, 3065	770	112	3656	2.33163	2.38781e-07	4.77562e-09	1.29376e-07
GOTERM_BP_FAT	GO:0022402~cell cycle process	108	13.1387	8.33558e-11	8881, 7536, 332, 10403, 6872, 22974, 5536, 64682, 2956, 4194, 4292, 7283, 23645, 25, 25788, 207, 5036, 1616, 51434, 4609, 9156, 10270, 6500, 1647, 5347, 79027, 2175, 595, 811, 8379, 890, 2081, 4436, 1111, 90, 3014, 26271, 996, 994, 899, 993, 990, 991, 9184, 203068, 894, 891, 4772, 898, 1869, 64151, 5682, 8841, 5685, 983, 641, 5683, 9491, 10393, 10197, 701, 10657, 7251, 9611, 5708, 580, 5691, 5693…	770	291	3656	1.76216	2.80576e-07	5.50149e-09	1.52021e-07
GOTERM_BP_FAT	GO:0043193~positive regulation of gene-specific transcription	33	4.0146	9.57268e-11	4208, 6722, 3148, 6598, 7026, 6597, 4851, 6872, 1499, 10014, 7391, 51085, 3172, 7376, 10062, 5629, 3091, 9759, 1385, 5468, 7157, 10370, 2494, 93649, 4088, 3065, 3066, 2113, 2547, 5591, 4792, 4087, 6934	770	51	3656	3.07227	3.22217e-07	6.19647e-09	1.74582e-07
GOTERM_BP_FAT	GO:0010552~positive regulation of specific transcription from RNA polymerase II promoter	28	3.40633	1.01948e-10	4208, 6722, 3148, 6598, 6597, 4851, 6872, 1499, 10014, 51085, 7391, 3172, 7376, 10062, 9759, 1385, 5468, 7157, 10370, 93649, 4088, 3065, 3066, 2113, 2547, 5591, 4792, 6934	770	39	3656	3.40886	3.43158e-07	6.47469e-09	1.85929e-07
GOTERM_BP_FAT	GO:0006468~protein amino acid phosphorylation	111	13.5036	1.36841e-10	55437, 2149, 6775, 6772, 6872, 4616, 3480, 6416, 8737, 3486, 23139, 9043, 57761, 4217, 1487, 5747, 9252, 4215, 4216, 4294, 5170, 3551, 1326, 6885, 1385, 25, 3716, 207, 3717, 1616, 29904, 10912, 6776, 1459, 1432, 4188, 2071, 2268, 5610, 2771, 28996, 11035, 5347, 9020, 7048, 7046, 4092, 595, 695, 1445, 1263, 2081, 1111, 90, 2185, 3932, 2580, 5127, 1147, 5894, 6464, 8767, 8576, 983, 9833, 5585, 5113…	770	304	3656	1.73366	4.60607e-07	8.52977e-09	2.49565e-07
GOTERM_BP_FAT	GO:0033554~cellular response to stress	110	13.382	1.59455e-10	3725, 1410, 55437, 3148, 3146, 8678, 331, 6421, 8930, 6416, 8737, 2956, 604, 9656, 602, 4217, 7486, 4292, 4216, 3091, 23645, 4294, 25, 25788, 51567, 51366, 3717, 1616, 10912, 546, 7341, 9156, 10524, 1432, 4188, 2071, 51499, 9361, 5610, 6188, 28996, 27113, 7334, 1647, 2175, 9978, 4780, 595, 2081, 890, 4176, 10519, 328, 2309, 1111, 4436, 3014, 27301, 10933, 842, 11221, 10856, 983, 641, 50484, 5585,…	770	301	3656	1.73517	5.36725e-07	9.75865e-09	2.90807e-07
GOTERM_BP_FAT	GO:0043549~regulation of kinase activity	74	9.00243	4.36538e-10	29950, 55437, 2149, 6464, 7249, 641, 4616, 8737, 58533, 8877, 5585, 9043, 57761, 4217, 5606, 11140, 4216, 4294, 5170, 5925, 5608, 6885, 1855, 207, 11184, 836, 3717, 1616, 5590, 80824, 10912, 5934, 29882, 5879, 8517, 4331, 1956, 4188, 5663, 1027, 1026, 7189, 1033, 2771, 8812, 5515, 1647, 5518, 8795, 8440, 7048, 3654, 7046, 595, 11266, 2081, 4869, 1111, 857, 1020, 994, 1022, 7098, 993, 5573, 990, 9…	770	178	3656	1.97391	1.46939e-06	2.62391e-08	7.96138e-07
GOTERM_BP_FAT	GO:0043066~negative regulation of apoptosis	74	9.00243	4.36538e-10	4208, 1410, 55437, 2149, 3146, 8535, 4851, 8767, 332, 3875, 8678, 330, 331, 8841, 983, 1051, 3480, 4615, 8837, 8878, 8877, 573, 604, 602, 2065, 580, 581, 3551, 6885, 3309, 207, 836, 8682, 939, 10370, 5590, 7128, 4088, 6777, 6776, 4790, 4792, 4609, 6934, 9530, 9531, 4331, 3265, 5599, 1956, 51100, 5970, 2932, 10673, 5663, 51499, 1026, 3315, 26574, 7189, 28996, 3654, 7046, 599, 598, 2308, 4869, 4436…	770	178	3656	1.97391	1.46939e-06	2.62391e-08	7.96138e-07
GOTERM_BP_FAT	GO:0032270~positive regulation of cellular protein metabolic process	58	7.05596	4.81947e-10	8881, 10401, 5682, 6872, 5685, 5683, 983, 9491, 10393, 64682, 10197, 10062, 602, 5708, 5691, 5693, 5700, 5701, 207, 3717, 5688, 8454, 8312, 51434, 29882, 4792, 5594, 5717, 8554, 2033, 10273, 5663, 1786, 8764, 6500, 1789, 51343, 7334, 5347, 7376, 7046, 4092, 595, 659, 5300, 3059, 11065, 9759, 51588, 1019, 857, 26271, 996, 991, 894, 3066, 2185, 891	770	126	3656	2.18561	1.62223e-06	2.84602e-08	8.78953e-07
GOTERM_BP_FAT	GO:0044092~negative regulation of molecular function	70	8.51582	4.92718e-10	8881, 59307, 5682, 332, 7249, 5685, 5683, 4616, 9491, 10393, 64682, 10197, 58533, 7067, 701, 5580, 57761, 5708, 5691, 5170, 3398, 5693, 5925, 5700, 1855, 3309, 166, 5701, 207, 836, 3717, 5688, 5590, 80824, 10912, 7341, 51434, 29882, 4790, 4085, 4792, 23411, 5717, 5087, 4188, 5663, 1027, 1026, 6188, 2771, 3172, 51343, 5515, 1647, 5518, 3654, 4092, 11065, 5629, 9759, 857, 26271, 5468, 7157, 996, 99…	770	165	3656	2.01433	1.65849e-06	2.85946e-08	8.98596e-07
GOTERM_BP_FAT	GO:0031400~negative regulation of protein modification process	43	5.23114	5.77796e-10	3725, 5717, 8881, 5682, 5663, 1786, 5685, 5683, 1789, 9491, 10393, 64682, 3172, 51343, 5515, 5518, 6418, 3486, 10197, 701, 578, 5580, 4092, 7529, 11065, 5708, 581, 5691, 5693, 857, 26271, 5700, 5701, 996, 1020, 5688, 5590, 991, 9184, 51434, 29882, 7531, 4085	770	81	3656	2.52057	1.94486e-06	3.29638e-08	1.05376e-06
GOTERM_BP_FAT	GO:0000122~negative regulation of transcription from RNA polymerase II promoter	55	6.691	8.36996e-10	4208, 1869, 6774, 7026, 3146, 6597, 8535, 5916, 8841, 1523, 51085, 5987, 6497, 604, 1487, 9611, 4194, 3398, 5925, 6256, 166, 23741, 10370, 4088, 4790, 7554, 5931, 10524, 25942, 3660, 10174, 4188, 1786, 1788, 8204, 1499, 5465, 10014, 6045, 28996, 23429, 4092, 10771, 811, 5629, 9759, 51588, 5468, 53615, 7157, 10608, 8431, 3065, 3066, 3665	770	118	3656	2.21308	2.81732e-06	4.69555e-08	1.52648e-06
GOTERM_BP_FAT	GO:0051247~positive regulation of protein metabolic process	60	7.29927	8.7882e-10	8881, 10401, 5682, 6872, 5685, 5683, 983, 9491, 10393, 64682, 10197, 10062, 602, 580, 5708, 5691, 5693, 5700, 5701, 207, 3717, 5688, 8454, 8312, 51434, 29882, 4792, 5594, 5717, 8554, 2033, 10273, 5663, 1786, 8764, 6500, 1789, 51343, 7334, 5347, 7376, 7046, 4092, 595, 659, 5300, 3059, 11065, 9759, 51588, 1019, 857, 26271, 996, 991, 894, 3066, 2185, 891, 83737	770	134	3656	2.12599	2.9581e-06	4.84936e-08	1.60275e-06
GOTERM_BP_FAT	GO:0051338~regulation of transferase activity	75	9.12409	9.58718e-10	29950, 55437, 2149, 6464, 7249, 641, 4616, 8737, 58533, 8877, 5585, 9043, 57761, 4217, 5606, 11140, 4216, 4294, 5170, 5925, 5608, 6885, 1855, 207, 11184, 836, 3717, 1616, 5590, 80824, 10912, 5934, 29882, 5879, 8517, 4331, 1956, 4188, 5663, 1027, 1026, 7189, 1033, 2771, 8812, 5515, 1647, 5518, 8795, 8440, 7048, 3654, 7046, 595, 11266, 2081, 4869, 1111, 857, 5468, 1020, 994, 1022, 7098, 5573, 993, …	770	184	3656	1.93535	3.22704e-06	5.20491e-08	1.74847e-06
GOTERM_BP_FAT	GO:0051098~regulation of binding	44	5.3528	9.90447e-10	59307, 5087, 7026, 6598, 4188, 6597, 2033, 5970, 8721, 8767, 5663, 8202, 6188, 641, 10014, 4615, 28996, 3172, 7334, 8737, 7067, 6497, 578, 3654, 4092, 5580, 602, 328, 4869, 5629, 581, 9759, 5092, 3398, 3551, 166, 3717, 7098, 7341, 4088, 3066, 4792, 23411, 4087	770	85	3656	2.45782	3.33384e-06	5.29182e-08	1.80633e-06
GOTERM_BP_FAT	GO:0060548~negative regulation of cell death	74	9.00243	1.08045e-09	4208, 1410, 55437, 2149, 3146, 8535, 4851, 8767, 332, 3875, 8678, 330, 331, 8841, 983, 1051, 3480, 4615, 8837, 8878, 8877, 573, 604, 602, 2065, 580, 581, 3551, 6885, 3309, 207, 836, 8682, 939, 10370, 5590, 7128, 4088, 6777, 6776, 4790, 4792, 4609, 6934, 9530, 9531, 4331, 3265, 5599, 1956, 51100, 5970, 2932, 10673, 5663, 51499, 1026, 3315, 26574, 7189, 28996, 3654, 7046, 599, 598, 2308, 4869, 4436…	770	181	3656	1.94119	3.63678e-06	5.68248e-08	1.97047e-06
GOTERM_BP_FAT	GO:0043069~negative regulation of programmed cell death	74	9.00243	1.08045e-09	4208, 1410, 55437, 2149, 3146, 8535, 4851, 8767, 332, 3875, 8678, 330, 331, 8841, 983, 1051, 3480, 4615, 8837, 8878, 8877, 573, 604, 602, 2065, 580, 581, 3551, 6885, 3309, 207, 836, 8682, 939, 10370, 5590, 7128, 4088, 6777, 6776, 4790, 4792, 4609, 6934, 9530, 9531, 4331, 3265, 5599, 1956, 51100, 5970, 2932, 10673, 5663, 51499, 1026, 3315, 26574, 7189, 28996, 3654, 7046, 599, 598, 2308, 4869, 4436…	770	181	3656	1.94119	3.63678e-06	5.68248e-08	1.97047e-06
GOTERM_BP_FAT	GO:0010627~regulation of protein kinase cascade	54	6.56934	1.90842e-09	841, 2149, 8767, 7249, 8841, 5536, 4615, 8772, 10758, 8837, 8737, 8878, 5585, 4217, 9611, 2065, 4215, 4294, 23542, 3551, 6885, 834, 207, 11184, 7132, 939, 3717, 1616, 8312, 7128, 10174, 4188, 5970, 57708, 1499, 7189, 7188, 28996, 3172, 7334, 5515, 8795, 5518, 51347, 23118, 7046, 8717, 958, 3059, 329, 857, 29110, 7098, 2185	770	117	3656	2.19141	6.42371e-06	9.88266e-08	3.48048e-06
GOTERM_BP_FAT	GO:0006796~phosphate metabolic process	131	15.9367	1.99644e-09	55437, 6775, 2149, 6772, 6872, 5536, 4616, 3480, 6416, 8737, 3486, 23139, 9043, 57761, 4217, 1487, 5747, 9252, 4215, 4216, 4294, 5170, 3551, 25, 1385, 1326, 6885, 3716, 207, 3717, 29904, 1616, 80824, 9150, 10912, 6776, 1459, 1432, 4188, 2071, 2268, 5610, 2771, 5801, 28996, 11035, 5347, 9020, 7048, 1847, 7046, 4092, 1845, 1846, 595, 695, 1445, 1263, 2081, 1111, 4436, 90, 994, 993, 2185, 3932, 2580…	770	392	3656	1.58672	6.72e-06	1.01818e-07	3.64102e-06
GOTERM_BP_FAT	GO:0006793~phosphorus metabolic process	131	15.9367	1.99644e-09	55437, 6775, 2149, 6772, 6872, 5536, 4616, 3480, 6416, 8737, 3486, 23139, 9043, 57761, 4217, 1487, 5747, 9252, 4215, 4216, 4294, 5170, 3551, 25, 1385, 1326, 6885, 3716, 207, 3717, 29904, 1616, 80824, 9150, 10912, 6776, 1459, 1432, 4188, 2071, 2268, 5610, 2771, 5801, 28996, 11035, 5347, 9020, 7048, 1847, 7046, 4092, 1845, 1846, 595, 695, 1445, 1263, 2081, 1111, 4436, 90, 994, 993, 2185, 3932, 2580…	770	392	3656	1.58672	6.72e-06	1.01818e-07	3.64102e-06
GOTERM_BP_FAT	GO:0040008~regulation of growth	57	6.93431	2.26007e-09	29950, 1410, 6774, 6464, 10856, 3621, 3486, 8877, 86, 604, 7251, 4654, 7486, 5747, 5925, 1385, 207, 11007, 6198, 4088, 6777, 6776, 54825, 4692, 1601, 10524, 4739, 2033, 8200, 55257, 1027, 960, 1026, 27429, 3172, 27113, 5515, 5518, 7048, 7046, 10018, 694, 57142, 5629, 9564, 8607, 2305, 5468, 7157, 10933, 84312, 8804, 55929, 93649, 2185, 83737, 142	770	127	3656	2.13102	7.60738e-06	1.13543e-07	4.12182e-06
GOTERM_BP_FAT	GO:0012502~induction of programmed cell death	70	8.51582	5.62636e-09	843, 841, 6772, 8741, 10293, 8930, 1051, 8738, 8772, 8837, 8737, 50484, 8878, 2956, 572, 578, 602, 4217, 5601, 4292, 581, 4294, 7409, 25, 834, 836, 939, 3717, 5366, 1616, 8454, 8452, 7074, 4088, 2113, 5879, 4609, 5594, 8517, 11200, 5599, 51100, 5663, 2071, 1027, 1026, 27429, 6188, 26574, 7189, 23421, 7187, 28996, 11035, 27113, 5515, 8795, 5518, 10018, 7046, 8717, 8718, 695, 2081, 2309, 11214, 715…	770	173	3656	1.92118	1.89381e-05	2.78505e-07	1.02611e-05
GOTERM_BP_FAT	GO:0006917~induction of apoptosis	70	8.51582	5.62636e-09	843, 841, 6772, 8741, 10293, 8930, 1051, 8738, 8772, 8837, 8737, 50484, 8878, 2956, 572, 578, 602, 4217, 5601, 4292, 581, 4294, 7409, 25, 834, 836, 939, 3717, 5366, 1616, 8454, 8452, 7074, 4088, 2113, 5879, 4609, 5594, 8517, 11200, 5599, 51100, 5663, 2071, 1027, 1026, 27429, 6188, 26574, 7189, 23421, 7187, 28996, 11035, 27113, 5515, 8795, 5518, 10018, 7046, 8717, 8718, 695, 2081, 2309, 11214, 715…	770	173	3656	1.92118	1.89381e-05	2.78505e-07	1.02611e-05
GOTERM_BP_FAT	GO:0045859~regulation of protein kinase activity	69	8.39416	8.46898e-09	29950, 55437, 2149, 6464, 7249, 641, 4616, 8737, 58533, 8877, 5585, 9043, 57761, 4217, 5606, 11140, 4216, 4294, 5170, 5925, 5608, 6885, 1855, 207, 11184, 836, 3717, 1616, 5590, 80824, 10912, 29882, 8517, 4331, 1956, 4188, 5663, 1027, 1026, 7189, 1033, 2771, 5515, 8812, 1647, 5518, 8795, 8440, 7048, 3654, 7046, 595, 2081, 4869, 1111, 857, 1020, 994, 1022, 7098, 993, 5573, 990, 9467, 894, 7532, 218…	770	171	3656	1.91588	2.85062e-05	4.13139e-07	1.54453e-05
GOTERM_BP_FAT	GO:0045596~negative regulation of cell differentiation	40	4.86618	9.39915e-09	5087, 19, 4851, 5663, 8841, 1499, 10014, 5465, 7041, 1387, 7376, 6497, 7046, 604, 10062, 4092, 6662, 811, 595, 10140, 57142, 5747, 9759, 857, 5468, 8115, 7157, 11007, 5978, 7098, 8313, 4088, 6777, 3065, 396, 6776, 4792, 23411, 5594, 6934	770	78	3656	2.4349	3.1637e-05	4.51965e-07	1.71417e-05
GOTERM_BP_FAT	GO:0008285~negative regulation of cell proliferation	62	7.54258	1.04754e-08	1003, 3725, 7536, 2149, 5916, 3621, 7249, 8678, 3486, 6497, 604, 7251, 1488, 1487, 10140, 5796, 4194, 581, 5925, 6256, 23641, 8061, 836, 3717, 8454, 4601, 8313, 4088, 2113, 4692, 4086, 4087, 9982, 6794, 1027, 1026, 5610, 8764, 6282, 1033, 7041, 3172, 8440, 7048, 22920, 9231, 1445, 694, 4869, 5629, 5245, 1111, 9759, 857, 23495, 5468, 7157, 8805, 10608, 990, 83737, 4335	770	148	3656	1.98905	3.52597e-05	4.96624e-07	1.91046e-05
GOTERM_BP_FAT	GO:0051438~regulation of ubiquitin-protein ligase activity	33	4.0146	2.83815e-08	5717, 8881, 5682, 5685, 983, 5683, 6500, 9491, 10393, 64682, 51343, 7334, 5347, 10197, 701, 4092, 5300, 11065, 5708, 5691, 5693, 5700, 26271, 5701, 996, 5688, 8454, 9184, 991, 51434, 29882, 891, 4085	770	60	3656	2.61143	9.55276e-05	1.32683e-06	5.17609e-05
GOTERM_BP_FAT	GO:0031396~regulation of protein ubiquitination	36	4.37956	3.44416e-08	5717, 8881, 10273, 5682, 5685, 983, 5683, 6500, 9491, 10393, 64682, 51343, 7334, 5347, 10197, 701, 4092, 5300, 11065, 5708, 5691, 5693, 5700, 26271, 5701, 996, 1020, 5688, 8454, 8312, 9184, 991, 51434, 29882, 891, 4085	770	69	3656	2.47724	0.000115924	1.58809e-06	6.28131e-05
GOTERM_BP_FAT	GO:0031401~positive regulation of protein modification process	47	5.71776	4.03154e-08	5717, 8554, 8881, 10401, 10273, 5682, 5663, 1786, 5685, 8764, 1789, 983, 5683, 6500, 9491, 10393, 64682, 51343, 7334, 10197, 5347, 7046, 4092, 595, 659, 5300, 11065, 5708, 3059, 5691, 9759, 5693, 51588, 857, 26271, 5700, 5701, 3717, 996, 5688, 8454, 8312, 991, 51434, 894, 29882, 891	770	103	3656	2.16659	0.000135692	1.8338e-06	7.35254e-05
GOTERM_BP_FAT	GO:0016310~phosphorylation	113	13.747	5.96062e-08	55437, 2149, 6775, 6772, 6872, 4616, 3480, 6416, 8737, 3486, 23139, 9043, 57761, 4217, 1487, 5747, 9252, 4215, 4216, 4294, 5170, 3551, 1326, 6885, 1385, 25, 3716, 207, 3717, 1616, 29904, 10912, 6776, 1459, 1432, 4188, 2071, 2268, 5610, 2771, 28996, 11035, 5347, 9020, 7048, 7046, 4092, 595, 695, 1445, 1263, 2081, 4436, 1111, 90, 2185, 3932, 2580, 5127, 1147, 5894, 6464, 8767, 8576, 983, 9833, 5585…	770	341	3656	1.5734	0.000200614	2.67512e-06	0.000108707
GOTERM_BP_FAT	GO:0051248~negative regulation of protein metabolic process	50	6.08273	6.49226e-08	3725, 8881, 5682, 5685, 5683, 10393, 9491, 64682, 6418, 3486, 10197, 701, 578, 5580, 5708, 4194, 581, 5691, 5693, 5700, 5701, 5688, 2, 5590, 51434, 29882, 4790, 4085, 5717, 5970, 5663, 1786, 1789, 3172, 51343, 5515, 5518, 4092, 811, 7529, 11065, 857, 26271, 3326, 996, 1020, 9184, 991, 51247, 7531	770	114	3656	2.08248	0.000218505	2.87538e-06	0.000118403
GOTERM_BP_FAT	GO:0051340~regulation of ligase activity	33	4.0146	7.9532e-08	5717, 8881, 5682, 5685, 983, 5683, 6500, 9491, 10393, 64682, 51343, 7334, 5347, 10197, 701, 4092, 5300, 11065, 5708, 5691, 5693, 5700, 26271, 5701, 996, 5688, 8454, 9184, 991, 51434, 29882, 891, 4085	770	62	3656	2.52719	0.000267669	3.47668e-06	0.000145047
GOTERM_BP_FAT	GO:0007249~I-kappaB kinase/NF-kappaB cascade	25	3.04136	7.98169e-08	3661, 8517, 1147, 8518, 6772, 7189, 11035, 10010, 8795, 8737, 51135, 3654, 602, 79753, 695, 92610, 134728, 3551, 6885, 79155, 939, 29110, 7098, 64343, 4792	770	40	3656	2.96753	0.000268628	3.4444e-06	0.000145566
GOTERM_BP_FAT	GO:0000165~MAPKKK cascade	42	5.10949	1.14585e-07	1410, 55437, 5599, 11221, 2149, 4188, 1956, 6464, 9261, 5663, 4616, 2771, 6416, 5515, 8737, 5518, 51347, 5585, 7046, 9043, 1846, 4217, 5601, 5606, 4215, 4216, 4294, 23542, 6885, 5608, 857, 11184, 3717, 1616, 5979, 80824, 10912, 2258, 2185, 5598, 4086, 5594	770	90	3656	2.21576	0.000385618	4.88216e-06	0.000208974
GOTERM_BP_FAT	GO:0051094~positive regulation of developmental process	49	5.96107	1.38542e-07	3725, 6722, 4851, 8741, 3727, 60436, 3486, 7068, 8877, 572, 4654, 5601, 581, 3091, 3398, 5925, 207, 7132, 939, 3717, 6198, 7074, 6777, 4088, 2113, 6776, 4790, 4086, 4087, 4023, 1432, 5970, 8200, 1499, 1789, 81565, 7041, 4090, 7048, 8717, 659, 694, 2309, 5629, 90, 5468, 396, 2547, 898	770	113	3656	2.05889	0.000466223	5.82912e-06	0.000252666
GOTERM_BP_FAT	GO:0010033~response to organic substance	105	12.7737	1.42194e-07	3725, 1410, 3148, 6774, 2149, 6772, 10401, 5536, 4615, 3480, 8737, 7067, 23645, 5170, 1385, 166, 207, 5366, 939, 3717, 133522, 2, 10628, 6777, 6776, 6778, 4792, 4609, 1432, 5970, 26060, 5610, 3315, 10014, 3320, 2274, 7048, 4780, 7046, 1846, 595, 2081, 890, 598, 2308, 329, 4436, 9759, 9564, 3326, 4170, 5573, 5337, 894, 2185, 898, 6721, 6722, 841, 10241, 6464, 8767, 7391, 6927, 2065, 2908, 3398, 62…	770	315	3656	1.58268	0.00047851	5.90893e-06	0.000259326
GOTERM_BP_FAT	GO:0051276~chromosome organization	78	9.48905	2.82358e-07	6599, 3148, 6598, 64151, 6597, 1108, 3146, 8535, 10951, 10856, 10403, 8841, 641, 2648, 23468, 6927, 92815, 1387, 6314, 6418, 2956, 86, 7486, 9611, 5926, 9252, 6839, 2908, 5925, 9869, 8726, 4751, 5934, 6601, 11143, 8295, 5591, 4085, 10728, 6605, 23411, 5931, 11335, 10524, 2033, 10270, 55257, 1786, 64754, 1788, 1789, 10014, 6045, 7334, 9126, 4869, 5245, 7011, 4673, 4436, 9759, 10419, 7153, 8607, 64…	770	217	3656	1.70667	0.000949964	1.15904e-05	0.00051495
GOTERM_BP_FAT	GO:0032269~negative regulation of cellular protein metabolic process	48	5.83942	2.91999e-07	3725, 5717, 8881, 5682, 5663, 1786, 5685, 1789, 5683, 9491, 10393, 64682, 3172, 51343, 5515, 5518, 10197, 6418, 3486, 701, 578, 5580, 4092, 811, 7529, 11065, 5708, 581, 5691, 5693, 857, 3326, 26271, 5700, 5701, 996, 1020, 5688, 2, 5590, 991, 9184, 51434, 51247, 29882, 4790, 7531, 4085	770	112	3656	2.03488	0.000982385	1.18417e-05	0.000532533
GOTERM_BP_FAT	GO:0031398~positive regulation of protein ubiquitination	32	3.89294	3.24206e-07	5717, 8881, 10273, 5682, 5685, 983, 5683, 6500, 9491, 10393, 64682, 51343, 7334, 5347, 10197, 4092, 5300, 11065, 5708, 5691, 5693, 5700, 26271, 5701, 996, 5688, 8454, 8312, 991, 51434, 29882, 891	770	62	3656	2.45061	0.00109068	1.29913e-05	0.00059127
GOTERM_BP_FAT	GO:0051101~regulation of DNA binding	35	4.25791	3.27606e-07	59307, 5087, 6598, 7026, 4188, 2033, 6597, 8721, 5970, 8767, 8202, 6188, 10014, 4615, 28996, 3172, 7334, 8737, 7067, 6497, 3654, 4092, 602, 328, 4869, 5629, 9759, 3398, 3551, 3717, 7098, 7341, 3066, 4792, 23411	770	71	3656	2.34059	0.00110211	1.29731e-05	0.000597471
GOTERM_BP_FAT	GO:0043086~negative regulation of catalytic activity	54	6.56934	3.77797e-07	8881, 5682, 332, 7249, 5685, 5683, 4616, 10393, 9491, 64682, 10197, 58533, 701, 57761, 5708, 5691, 5170, 5693, 5925, 3309, 1855, 5700, 207, 5701, 836, 5688, 5590, 80824, 10912, 51434, 29882, 4790, 4085, 23411, 5717, 5663, 1027, 1026, 2771, 51343, 5515, 1647, 5518, 4092, 11065, 857, 5468, 26271, 7157, 996, 9184, 991, 9467, 7532	770	133	3656	1.92778	0.00127086	1.47867e-05	0.000689007
GOTERM_BP_FAT	GO:0000278~mitotic cell cycle	78	9.48905	4.34655e-07	8881, 1869, 64151, 5682, 332, 10403, 6872, 22974, 5536, 5685, 5683, 983, 641, 9491, 10393, 64682, 10197, 701, 10657, 5708, 5691, 5693, 5925, 25, 5700, 5701, 207, 5688, 121441, 8454, 8452, 4751, 51434, 29882, 4085, 5717, 4331, 4739, 1956, 2935, 1027, 10270, 1026, 6500, 6790, 1033, 6045, 51343, 9126, 8812, 1647, 5347, 4863, 595, 8379, 9937, 890, 11065, 1017, 90, 1111, 1019, 8607, 26271, 996, 994, 8…	770	219	3656	1.69109	0.00146198	1.68165e-05	0.000792702
GOTERM_BP_FAT	GO:0007346~regulation of mitotic cell cycle	37	4.50122	4.65407e-07	8881, 6597, 1956, 332, 51499, 8841, 26574, 983, 10393, 3172, 8877, 79027, 701, 604, 595, 8379, 5300, 55145, 11065, 890, 5629, 1017, 10419, 5925, 26271, 7157, 990, 4751, 9184, 9587, 4088, 6777, 6776, 8295, 4085, 998, 4609	770	78	3656	2.25228	0.00156533	1.78017e-05	0.000848785
GOTERM_BP_FAT	GO:0051439~regulation of ubiquitin-protein ligase activity during mitotic cell cycle	30	3.64964	4.8829e-07	5717, 8881, 5682, 5685, 983, 5683, 6500, 9491, 10393, 64682, 51343, 5347, 10197, 701, 11065, 5708, 5691, 5693, 5700, 26271, 5701, 996, 5688, 8454, 9184, 991, 51434, 29882, 891, 4085	770	57	3656	2.49897	0.00164223	1.84671e-05	0.000890517
GOTERM_BP_FAT	GO:0006974~response to DNA damage stimulus	75	9.12409	6.72834e-07	842, 3148, 3146, 10856, 331, 6421, 641, 983, 8930, 50484, 2956, 5886, 604, 9656, 602, 7486, 580, 4841, 4292, 5883, 581, 23645, 5608, 25, 25788, 51567, 51366, 836, 10912, 546, 7341, 5591, 23411, 5594, 9156, 10524, 9319, 4331, 11200, 1432, 23054, 11073, 2071, 5663, 51499, 1026, 6188, 26574, 28996, 27113, 7334, 9126, 1647, 9978, 2175, 595, 9937, 890, 328, 10519, 4176, 2309, 4436, 1111, 7153, 3014, 6…	770	210	3656	1.69573	0.0022622	2.51637e-05	0.00122708
GOTERM_BP_FAT	GO:0022403~cell cycle phase	75	9.12409	1.02714e-06	8881, 1869, 64151, 332, 10403, 6872, 22974, 8841, 5536, 641, 983, 10393, 64682, 2956, 701, 10657, 9611, 7283, 4292, 5925, 25, 25788, 207, 121441, 8454, 8452, 4751, 51434, 29882, 4085, 9156, 9319, 4331, 4739, 1956, 2935, 10270, 1027, 1026, 6790, 1033, 51343, 9126, 8812, 1647, 5347, 2175, 79027, 4863, 595, 8379, 9937, 890, 11065, 1017, 90, 1111, 1019, 8607, 3014, 26271, 996, 899, 994, 993, 990, 991…	770	212	3656	1.67974	0.0034514	3.79923e-05	0.00187324
GOTERM_BP_FAT	GO:0010740~positive regulation of protein kinase cascade	36	4.37956	1.05936e-06	841, 10174, 2149, 5970, 8767, 57708, 5536, 1499, 7189, 4615, 7188, 28996, 10758, 8772, 8837, 7334, 8795, 8737, 51347, 23118, 7046, 8717, 958, 2065, 3059, 4215, 329, 23542, 6885, 834, 3717, 939, 29110, 7132, 7098, 8312	770	77	3656	2.21987	0.00355945	3.87579e-05	0.00193199
GOTERM_BP_FAT	GO:0051443~positive regulation of ubiquitin-protein ligase activity	29	3.52798	1.22003e-06	5717, 8881, 5682, 5685, 983, 5683, 6500, 9491, 10393, 64682, 51343, 7334, 5347, 10197, 5300, 11065, 5708, 5691, 5693, 5700, 26271, 5701, 996, 5688, 8454, 991, 51434, 29882, 891	770	56	3656	2.45881	0.0040982	4.41562e-05	0.00222501
GOTERM_BP_FAT	GO:0009314~response to radiation	39	4.74453	1.25497e-06	842, 3265, 840, 5599, 8533, 11073, 1956, 5970, 2071, 1026, 641, 9094, 1789, 8930, 7391, 60626, 2956, 578, 602, 7486, 595, 5796, 598, 2063, 581, 4436, 857, 3014, 25788, 207, 836, 7157, 1020, 408, 2237, 2547, 2353, 5591, 4609	770	87	3656	2.12844	0.00421534	4.49378e-05	0.00228874
GOTERM_BP_FAT	GO:0007167~enzyme linked receptor protein signaling pathway	57	6.93431	2.14993e-06	3725, 6774, 5894, 6464, 7249, 3480, 5327, 6497, 10140, 5747, 5796, 2065, 55914, 9252, 23542, 6885, 1385, 3716, 1855, 207, 3717, 409, 10628, 5979, 7074, 4088, 6777, 6776, 4692, 4086, 7554, 4690, 4087, 64750, 1956, 26060, 10273, 867, 8200, 7041, 28996, 8440, 4090, 7048, 819, 3654, 7046, 4092, 659, 5764, 2308, 90, 9564, 1020, 3667, 2185, 2353	770	150	3656	1.80426	0.00721054	7.61724e-05	0.00392086
GOTERM_BP_FAT	GO:0006325~chromatin organization	60	7.29927	2.31088e-06	3148, 6599, 6598, 1108, 6597, 3146, 8535, 10951, 10856, 8841, 2648, 23468, 6927, 92815, 1387, 6314, 6418, 86, 9611, 5926, 9252, 6839, 2908, 5925, 9869, 8726, 5934, 6601, 8295, 11143, 23411, 6605, 11335, 5931, 10524, 2033, 55257, 1786, 64754, 1788, 1789, 10014, 6045, 7334, 4869, 5245, 4673, 9759, 8607, 10419, 3159, 64769, 3014, 53615, 10933, 23186, 10498, 55929, 3065, 3066	770	161	3656	1.76946	0.00774827	8.10221e-05	0.0042144
GOTERM_BP_FAT	GO:0008284~positive regulation of cell proliferation	62	7.54258	2.7755e-06	29950, 3725, 688, 2149, 6464, 6772, 4851, 8767, 8741, 641, 3480, 8877, 604, 4194, 3091, 3398, 8061, 3717, 6198, 5590, 8452, 6777, 6776, 4609, 5594, 4690, 4331, 3265, 5087, 2355, 1956, 5970, 10673, 1027, 1026, 7188, 2771, 28996, 8792, 8440, 7048, 7046, 595, 811, 958, 5764, 890, 3059, 598, 4869, 5629, 4673, 1017, 9759, 1019, 994, 93649, 3065, 3667, 894, 3066, 2185	770	169	3656	1.74189	0.00929885	9.63083e-05	0.00506172
GOTERM_BP_FAT	GO:0051351~positive regulation of ligase activity	29	3.52798	2.99252e-06	5717, 8881, 5682, 5685, 983, 5683, 6500, 9491, 10393, 64682, 51343, 7334, 5347, 10197, 5300, 11065, 5708, 5691, 5693, 5700, 26271, 5701, 996, 5688, 8454, 991, 51434, 29882, 891	770	58	3656	2.37403	0.0100223	0.000102779	0.00545748
GOTERM_BP_FAT	GO:0043122~regulation of I-kappaB kinase/NF-kappaB cascade	28	3.40633	2.99514e-06	841, 2149, 5970, 8767, 57708, 5536, 7189, 7188, 4615, 10758, 8772, 8837, 7334, 8795, 8737, 23118, 8878, 8717, 958, 329, 4215, 3551, 6885, 834, 29110, 7132, 7098, 7128	770	55	3656	2.41719	0.010031	0.00010183	0.00546226
GOTERM_BP_FAT	GO:0045597~positive regulation of cell differentiation	41	4.98783	3.89044e-06	3725, 6722, 4023, 1432, 5970, 4851, 8200, 3727, 1499, 1789, 81565, 7041, 60436, 3486, 7068, 4090, 572, 7048, 659, 5601, 694, 2309, 90, 3091, 3398, 5925, 5468, 207, 939, 3717, 7074, 4088, 6777, 396, 6776, 2113, 2547, 4790, 898, 4086, 4087	770	97	3656	2.00691	0.0130099	0.000130944	0.00709497
GOTERM_BP_FAT	GO:0051090~regulation of transcription factor activity	29	3.52798	4.57619e-06	59307, 6598, 7026, 5087, 2033, 6597, 5970, 8767, 8202, 6188, 10014, 4615, 3172, 7334, 8737, 7067, 3654, 4092, 4869, 5629, 9759, 3398, 3551, 3717, 7098, 7341, 3066, 4792, 23411	770	59	3656	2.33379	0.0152855	0.000152498	0.00834552
GOTERM_BP_FAT	GO:0009725~response to hormone stimulus	56	6.81265	5.06196e-06	6721, 6722, 1410, 3148, 6774, 6464, 6772, 10401, 3480, 7391, 7067, 2065, 5170, 6256, 8061, 207, 4982, 3717, 133522, 2, 6198, 10628, 6777, 6776, 5591, 5594, 23054, 2033, 5970, 26060, 1026, 768, 1499, 6790, 5465, 10014, 2274, 7048, 2026, 7046, 595, 3059, 890, 598, 2308, 9564, 857, 5468, 5573, 5337, 3667, 894, 2185, 2353, 898, 142	770	150	3656	1.77261	0.0168943	0.000167031	0.00923137
GOTERM_BP_FAT	GO:0034097~response to cytokine stimulus	21	2.55474	5.29172e-06	3725, 6722, 841, 10241, 6774, 598, 6772, 5970, 8767, 9759, 166, 8061, 836, 1499, 4170, 4615, 8737, 2353, 6778, 3654, 898	770	36	3656	2.7697	0.0176543	0.000172917	0.00965035
GOTERM_BP_FAT	GO:0009628~response to abiotic stimulus	57	6.93431	5.56667e-06	3725, 842, 1410, 840, 8533, 6558, 6772, 641, 8930, 7391, 60626, 2956, 5585, 578, 602, 7486, 5796, 2063, 581, 5170, 25788, 8061, 207, 836, 408, 6198, 10628, 5591, 5879, 4609, 3265, 5599, 11073, 1956, 5970, 2071, 1026, 3315, 9094, 1789, 7048, 7046, 595, 598, 4436, 857, 3014, 5468, 7157, 1020, 7098, 2237, 2534, 3066, 2547, 2185, 2353	770	154	3656	1.7574	0.018563	0.000180152	0.0101517
GOTERM_BP_FAT	GO:0008633~activation of pro-apoptotic gene products	12	1.45985	6.5079e-06	841, 7529, 5599, 8772, 8737, 8795, 4088, 572, 10018, 8717, 207, 4609	770	14	3656	4.06976	0.0216675	0.000208603	0.0118681
GOTERM_BP_FAT	GO:0009719~response to endogenous stimulus	59	7.17762	6.61804e-06	6721, 6722, 1410, 6774, 3148, 6464, 6772, 10401, 3480, 7391, 7067, 2065, 5170, 6256, 8061, 207, 4982, 3717, 133522, 2, 6198, 10628, 6777, 6776, 5591, 4086, 5594, 23054, 2033, 5970, 26060, 1026, 768, 1499, 6790, 5465, 10014, 2274, 7048, 2026, 7046, 595, 3059, 890, 598, 2308, 329, 4436, 9564, 857, 5468, 5573, 5337, 3667, 894, 2185, 2353, 898, 142	770	162	3656	1.72923	0.0220301	0.000210133	0.012069
GOTERM_BP_FAT	GO:0030522~intracellular receptor-mediated signaling pathway	24	2.91971	6.90898e-06	811, 8554, 10524, 57658, 9968, 23054, 5916, 2908, 5925, 6256, 8202, 8204, 51366, 1499, 3717, 133522, 10498, 7041, 1616, 8648, 1022, 2274, 7376, 898	770	45	3656	2.53229	0.0229874	0.00021732	0.0125995
GOTERM_BP_FAT	GO:0051437~positive regulation of ubiquitin-protein ligase activity during mitotic cell cycle	27	3.28467	7.21852e-06	5717, 8881, 5682, 5685, 983, 5683, 6500, 10393, 9491, 64682, 51343, 5347, 10197, 11065, 5708, 5691, 5693, 5700, 26271, 5701, 996, 5688, 8454, 991, 51434, 29882, 891	770	54	3656	2.37403	0.0240048	0.000224953	0.013164
GOTERM_BP_FAT	GO:0016569~covalent chromatin modification	30	3.64964	9.7396e-06	10524, 6597, 2033, 10856, 8841, 1788, 2648, 1789, 10014, 6045, 7334, 1387, 6314, 86, 9252, 6839, 5245, 9759, 10419, 8607, 64769, 53615, 10933, 10498, 55929, 3065, 3066, 8295, 11143, 23411	770	64	3656	2.22565	0.0322521	0.000300722	0.0177611
GOTERM_BP_FAT	GO:0009416~response to light stimulus	27	3.28467	1.1005e-05	842, 3265, 5599, 840, 8533, 1956, 5970, 2071, 1026, 9094, 7391, 60626, 2956, 602, 7486, 595, 5796, 2063, 581, 4436, 207, 836, 7157, 408, 1020, 2237, 2353	770	55	3656	2.33086	0.0363653	0.000336698	0.0200685
GOTERM_BP_FAT	GO:0080135~regulation of cellular response to stress	26	3.16302	1.12111e-05	4188, 8767, 8678, 8841, 6188, 81565, 28996, 7334, 8737, 51347, 5585, 4217, 9611, 4869, 4294, 23542, 6885, 3014, 207, 11184, 939, 1616, 7098, 8312, 2185, 23411	770	52	3656	2.37403	0.0370337	0.000339914	0.0204444
GOTERM_BP_FAT	GO:0033674~positive regulation of kinase activity	44	5.3528	1.15759e-05	55437, 8517, 2149, 4188, 1956, 6464, 5663, 4616, 7189, 2771, 8737, 8795, 8877, 7048, 5585, 7046, 3654, 9043, 4217, 595, 11266, 2081, 5606, 4869, 4216, 4294, 5170, 6885, 5608, 207, 11184, 3717, 1020, 1616, 994, 5590, 7098, 10912, 5573, 3667, 894, 2185, 5879, 998	770	111	3656	1.88211	0.0382154	0.000347839	0.0211095
GOTERM_BP_FAT	GO:0006366~transcription from RNA polymerase II promoter	52	6.32603	1.39542e-05	4149, 688, 9968, 6772, 6621, 6872, 196, 23650, 2648, 1051, 7391, 7067, 10302, 9611, 5926, 2908, 3091, 6882, 8061, 9111, 9015, 2113, 4790, 9439, 5452, 4609, 3661, 9319, 4331, 23054, 2071, 5465, 3174, 7041, 8812, 4800, 6908, 4780, 9325, 659, 328, 2305, 10987, 2963, 8805, 1022, 2962, 2960, 4772, 4335, 3665, 142	770	140	3656	1.76356	0.0458842	0.000415579	0.025446
GOTERM_BP_FAT	GO:0000079~regulation of cyclin-dependent protein kinase activity	21	2.55474	1.57606e-05	595, 29950, 4331, 1956, 11140, 1111, 1027, 1026, 207, 836, 641, 1033, 1022, 993, 8812, 1647, 990, 894, 29882, 900, 1163	770	38	3656	2.62392	0.0516681	0.000465249	0.0287396
GOTERM_BP_FAT	GO:0051352~negative regulation of ligase activity	26	3.16302	1.70634e-05	5717, 8881, 5682, 5685, 5683, 10393, 9491, 64682, 51343, 10197, 701, 4092, 11065, 5708, 5691, 5693, 5700, 26271, 5701, 996, 5688, 9184, 991, 51434, 29882, 4085	770	53	3656	2.32923	0.0558176	0.000499318	0.0311149
GOTERM_BP_FAT	GO:0014070~response to organic cyclic substance	26	3.16302	1.70634e-05	3725, 6774, 6772, 4738, 5970, 1026, 960, 5536, 1499, 7048, 2026, 7046, 595, 598, 329, 4436, 6256, 5468, 8061, 1020, 6198, 894, 3066, 2185, 2353, 898	770	53	3656	2.32923	0.0558176	0.000499318	0.0311149
GOTERM_BP_FAT	GO:0051444~negative regulation of ubiquitin-protein ligase activity	26	3.16302	1.70634e-05	5717, 8881, 5682, 5685, 5683, 10393, 9491, 64682, 51343, 10197, 701, 4092, 11065, 5708, 5691, 5693, 5700, 26271, 5701, 996, 5688, 9184, 991, 51434, 29882, 4085	770	53	3656	2.32923	0.0558176	0.000499318	0.0311149
GOTERM_BP_FAT	GO:0043123~positive regulation of I-kappaB kinase/NF-kappaB cascade	25	3.04136	1.7413e-05	841, 2149, 5970, 8767, 5536, 57708, 7189, 7188, 4615, 10758, 8772, 8837, 7334, 8795, 8737, 23118, 8717, 958, 329, 4215, 6885, 834, 29110, 7132, 7098	770	50	3656	2.37403	0.0569279	0.000505153	0.0317522
GOTERM_BP_FAT	GO:0042493~response to drug	35	4.25791	1.81643e-05	3725, 6721, 6774, 6772, 2033, 5970, 1026, 8841, 768, 1789, 7048, 2026, 595, 2065, 7150, 4436, 9759, 3551, 1385, 5608, 857, 5468, 25788, 8061, 4982, 7157, 6198, 10628, 7534, 3066, 2185, 2353, 898, 3932, 4086	770	82	3656	2.02661	0.0593098	0.00052244	0.033122
GOTERM_BP_FAT	GO:0051325~interphase	31	3.77129	1.87802e-05	4331, 1869, 1956, 2935, 332, 1027, 6872, 1026, 641, 10393, 1033, 1647, 79027, 10657, 4863, 595, 1111, 1017, 90, 1019, 5925, 25, 207, 8454, 993, 990, 8452, 894, 891, 4772, 898	770	69	3656	2.13318	0.061258	0.000535574	0.0342449
GOTERM_BP_FAT	GO:0032582~negative regulation of gene-specific transcription	18	2.18978	1.93006e-05	4208, 10524, 9611, 6597, 5629, 9759, 6256, 1027, 8841, 166, 5468, 5465, 10014, 4088, 3065, 3066, 4790, 4092	770	30	3656	2.84883	0.0629011	0.000545788	0.0351937
GOTERM_BP_FAT	GO:0051291~protein heterooligomerization	16	1.94647	2.38317e-05	3265, 841, 7529, 329, 7249, 5092, 330, 3728, 5536, 1499, 7132, 3480, 8772, 5590, 3667, 6497	770	25	3656	3.03875	0.0770852	0.000668263	0.0434542
GOTERM_BP_FAT	GO:0010553~negative regulation of specific transcription from RNA polymerase II promoter	16	1.94647	2.38317e-05	4208, 10524, 9611, 6597, 9759, 6256, 166, 5468, 8841, 10014, 5465, 4088, 3065, 3066, 4790, 4092	770	25	3656	3.03875	0.0770852	0.000668263	0.0434542
GOTERM_BP_FAT	GO:0031397~negative regulation of protein ubiquitination	27	3.28467	2.44132e-05	5717, 8881, 5682, 5685, 5683, 10393, 9491, 64682, 51343, 10197, 701, 4092, 11065, 5708, 5691, 5693, 5700, 26271, 5701, 996, 5688, 1020, 9184, 991, 51434, 29882, 4085	770	57	3656	2.24908	0.0788899	0.000678907	0.0445142
GOTERM_BP_FAT	GO:0051347~positive regulation of transferase activity	44	5.3528	2.51886e-05	55437, 8517, 2149, 4188, 1956, 6464, 5663, 4616, 7189, 2771, 8737, 8795, 8877, 7048, 5585, 7046, 3654, 9043, 4217, 595, 11266, 2081, 5606, 4869, 4216, 4294, 5170, 6885, 5608, 207, 11184, 3717, 1020, 1616, 994, 5590, 7098, 10912, 5573, 3667, 894, 2185, 5879, 998	770	114	3656	1.83258	0.081291	0.000694725	0.0459278
GOTERM_BP_FAT	GO:0045165~cell fate commitment	21	2.55474	2.60512e-05	7026, 6597, 4851, 5629, 5663, 5468, 836, 7157, 1499, 4170, 7041, 4090, 5451, 5591, 7046, 998, 4086, 4087, 4654, 6662, 6934	770	39	3656	2.55664	0.0839547	0.000712668	0.0475003
GOTERM_BP_FAT	GO:0070271~protein complex biogenesis	80	9.73236	2.80472e-05	1410, 841, 9968, 7249, 330, 6872, 7454, 8576, 5536, 3728, 641, 3480, 8772, 5987, 1387, 10302, 6497, 9043, 5747, 4194, 7283, 4292, 581, 6882, 23542, 1855, 10471, 7132, 5590, 4088, 9439, 5879, 2058, 4609, 4086, 4087, 4690, 4331, 3265, 1434, 23054, 8518, 7514, 6240, 6241, 2071, 9361, 1499, 3320, 7277, 5518, 51194, 6908, 8440, 2175, 84708, 3654, 22920, 811, 958, 6810, 7529, 26133, 4869, 329, 5092, 85…	770	249	3656	1.52548	0.0900887	0.000761066	0.0511388
GOTERM_BP_FAT	GO:0006461~protein complex assembly	80	9.73236	2.80472e-05	1410, 841, 9968, 7249, 330, 6872, 7454, 8576, 5536, 3728, 641, 3480, 8772, 5987, 1387, 10302, 6497, 9043, 5747, 4194, 7283, 4292, 581, 6882, 23542, 1855, 10471, 7132, 5590, 4088, 9439, 5879, 2058, 4609, 4086, 4087, 4690, 4331, 3265, 1434, 23054, 8518, 7514, 6240, 6241, 2071, 9361, 1499, 3320, 7277, 5518, 51194, 6908, 8440, 2175, 84708, 3654, 22920, 811, 958, 6810, 7529, 26133, 4869, 329, 5092, 85…	770	249	3656	1.52548	0.0900887	0.000761066	0.0511388
GOTERM_BP_FAT	GO:0051329~interphase of mitotic cell cycle	30	3.64964	2.86964e-05	4331, 1869, 1956, 2935, 332, 1027, 6872, 1026, 641, 10393, 1033, 1647, 10657, 4863, 595, 1017, 90, 1111, 1019, 5925, 25, 207, 8454, 993, 990, 8452, 894, 891, 4772, 898	770	67	3656	2.12599	0.0920749	0.000772449	0.0523222
GOTERM_BP_FAT	GO:0045936~negative regulation of phosphate metabolic process	17	2.06813	2.96491e-05	3725, 7529, 581, 5663, 857, 1027, 1026, 5590, 3172, 5515, 5518, 3486, 6314, 7531, 578, 4092, 5580	770	28	3656	2.88275	0.094982	0.000791753	0.0540589
GOTERM_BP_FAT	GO:0010563~negative regulation of phosphorus metabolic process	17	2.06813	2.96491e-05	3725, 7529, 581, 5663, 857, 1027, 1026, 5590, 3172, 5515, 5518, 3486, 6314, 7531, 578, 4092, 5580	770	28	3656	2.88275	0.094982	0.000791753	0.0540589
GOTERM_BP_FAT	GO:0060284~regulation of cell development	33	4.0146	3.0327e-05	5087, 5970, 4851, 5663, 8841, 1789, 10014, 81565, 7041, 60436, 3486, 4092, 811, 57142, 5747, 694, 581, 5629, 55755, 9759, 5468, 7157, 5978, 7074, 93649, 4088, 3065, 396, 894, 7532, 2547, 4086, 4087	770	77	3656	2.03488	0.0970446	0.000803473	0.0552945
GOTERM_BP_FAT	GO:0008283~cell proliferation	62	7.54258	3.34804e-05	8881, 1869, 5894, 7295, 6775, 7027, 8767, 22974, 10293, 5987, 1387, 608, 701, 572, 578, 10657, 5580, 4194, 581, 6257, 6256, 274, 5036, 51366, 55198, 8454, 4084, 5879, 4609, 6934, 5931, 1601, 4331, 3660, 1434, 1956, 26060, 10673, 5663, 1499, 2771, 81565, 5511, 5347, 10771, 958, 55145, 599, 4176, 9564, 10419, 7157, 996, 10933, 1020, 8804, 1022, 993, 9184, 2534, 2185, 1163	770	181	3656	1.6264	0.106578	0.000880056	0.0610423
GOTERM_BP_FAT	GO:0009411~response to UV	19	2.31144	3.81101e-05	7486, 595, 842, 5796, 5599, 840, 1956, 581, 5970, 4436, 2071, 1026, 207, 7157, 836, 7391, 2237, 2956, 602	770	34	3656	2.65332	0.120394	0.000993933	0.0694807
GOTERM_BP_FAT	GO:0051436~negative regulation of ubiquitin-protein ligase activity during mitotic cell cycle	25	3.04136	3.9522e-05	5717, 8881, 5682, 5685, 5683, 10393, 9491, 64682, 51343, 10197, 701, 11065, 5708, 5691, 5693, 5700, 26271, 5701, 996, 5688, 9184, 991, 51434, 29882, 4085	770	52	3656	2.28272	0.124564	0.00102281	0.0720539
GOTERM_BP_FAT	GO:0031145~anaphase-promoting complex-dependent proteasomal ubiquitin-dependent protein catabolic process	25	3.04136	3.9522e-05	5717, 8881, 5682, 5685, 983, 5683, 10393, 9491, 64682, 10197, 701, 11065, 5708, 5691, 5693, 5700, 5701, 996, 5688, 9184, 991, 51434, 29882, 891, 4085	770	52	3656	2.28272	0.124564	0.00102281	0.0720539
GOTERM_BP_FAT	GO:0045792~negative regulation of cell size	20	2.43309	4.05815e-05	1601, 29950, 1410, 57142, 694, 7249, 3621, 5925, 1027, 5468, 1026, 207, 7157, 11007, 3172, 5515, 5518, 4088, 54825, 604	770	37	3656	2.56651	0.127681	0.0010422	0.0739847
GOTERM_BP_FAT	GO:0007178~transmembrane receptor protein serine/threonine kinase signaling pathway	24	2.91971	4.10161e-05	3725, 659, 64750, 10140, 5796, 10273, 90, 8200, 1385, 6885, 409, 7041, 28996, 4088, 4090, 7048, 2353, 6497, 7046, 3654, 4092, 7554, 4086, 4087	770	49	3656	2.32558	0.128956	0.00104538	0.0747768
GOTERM_BP_FAT	GO:0030518~steroid hormone receptor signaling pathway	21	2.55474	4.19624e-05	811, 8554, 10524, 57658, 9968, 23054, 2908, 5925, 8202, 8204, 51366, 1499, 3717, 133522, 10498, 7041, 1616, 8648, 1022, 2274, 898	770	40	3656	2.49273	0.131726	0.00106146	0.0765015
GOTERM_BP_FAT	GO:0016568~chromatin modification	49	5.96107	5.18448e-05	6599, 6598, 1108, 6597, 8535, 10856, 8841, 2648, 6927, 1387, 6314, 86, 9611, 9252, 6839, 2908, 5925, 9869, 8726, 5934, 6601, 8295, 11143, 23411, 6605, 11335, 5931, 10524, 2033, 55257, 1786, 64754, 1788, 1789, 10014, 6045, 7334, 5245, 9759, 8607, 10419, 64769, 53615, 10933, 23186, 10498, 55929, 3065, 3066	770	135	3656	1.72337	0.160135	0.0013015	0.09451
GOTERM_BP_FAT	GO:0051100~negative regulation of binding	18	2.18978	5.92976e-05	59307, 5087, 4188, 5629, 9759, 3398, 166, 6188, 3717, 3172, 7341, 3066, 7067, 3654, 4792, 5580, 4092, 23411	770	32	3656	2.67078	0.180943	0.00147744	0.108089
GOTERM_BP_FAT	GO:0006259~DNA metabolic process	83	10.0973	6.27133e-05	3148, 6598, 3146, 10856, 6421, 641, 8930, 6418, 50484, 2956, 5886, 9656, 7486, 580, 4841, 4292, 5883, 581, 25, 25788, 8495, 1854, 51567, 836, 10912, 546, 7341, 11143, 5591, 10728, 4609, 23411, 9156, 5931, 9319, 10524, 4331, 23054, 11073, 6240, 6241, 2071, 1786, 9361, 1788, 1789, 3516, 7334, 9126, 1647, 9978, 2175, 7083, 4175, 9937, 10519, 328, 4176, 5245, 7011, 4673, 7150, 4436, 1017, 7155, 1111,…	770	266	3656	1.48154	0.190306	0.001551	0.114312
GOTERM_BP_FAT	GO:0046328~regulation of JNK cascade	19	2.31144	6.32531e-05	4217, 9611, 4188, 8767, 4294, 23542, 6885, 8841, 207, 11184, 939, 1616, 28996, 7098, 8737, 8312, 51347, 2185, 5585	770	35	3656	2.57751	0.191776	0.00155293	0.115295
GOTERM_BP_FAT	GO:0010647~positive regulation of cell communication	49	5.96107	6.43094e-05	841, 2149, 8767, 8678, 5536, 4615, 8772, 10758, 8837, 8737, 2065, 4215, 3091, 23542, 6885, 1855, 834, 7132, 939, 3717, 10370, 5590, 8312, 5879, 3265, 10174, 1956, 5970, 8202, 57708, 1499, 7189, 7041, 7188, 28996, 7334, 8795, 51347, 23118, 7046, 8717, 958, 3059, 329, 857, 29110, 7098, 3667, 3932	770	136	3656	1.7107	0.194645	0.00156741	0.11722
GOTERM_BP_FAT	GO:0045926~negative regulation of growth	20	2.43309	6.54023e-05	1601, 29950, 1410, 5747, 57142, 694, 3621, 5925, 1027, 5468, 1026, 7157, 11007, 3172, 27113, 5515, 5518, 4088, 54825, 604	770	38	3656	2.49897	0.197603	0.00158257	0.11921
GOTERM_BP_FAT	GO:0001836~release of cytochrome c from mitochondria	11	1.3382	7.0158e-05	3725, 840, 27113, 598, 581, 4088, 578, 836, 7157, 4609, 5366	770	14	3656	3.73061	0.210346	0.00168544	0.127874
GOTERM_BP_FAT	GO:0001558~regulation of cell growth	30	3.64964	7.65008e-05	1601, 29950, 1410, 2033, 3621, 1027, 960, 1026, 3172, 5515, 5518, 3486, 8877, 7046, 604, 7251, 57142, 694, 9564, 2305, 5925, 5468, 207, 7157, 11007, 93649, 4088, 2185, 83737, 54825	770	70	3656	2.03488	0.227027	0.00182466	0.139427
GOTERM_BP_FAT	GO:0009967~positive regulation of signal transduction	46	5.59611	7.8717e-05	841, 3265, 10174, 2149, 5970, 8767, 8202, 57708, 5536, 1499, 7189, 4615, 7188, 7041, 28996, 8772, 10758, 8837, 7334, 8737, 8795, 51347, 23118, 7046, 8717, 958, 2065, 3059, 4215, 329, 3091, 23542, 6885, 857, 1855, 834, 7132, 939, 29110, 3717, 10370, 7098, 8312, 3667, 5879, 3932	770	126	3656	1.73342	0.232772	0.00186426	0.143463
GOTERM_BP_FAT	GO:0045860~positive regulation of protein kinase activity	40	4.86618	8.92558e-05	55437, 8517, 2149, 4188, 1956, 6464, 5663, 4616, 7189, 2771, 8795, 8737, 8877, 7048, 5585, 7046, 3654, 9043, 4217, 595, 2081, 5606, 4869, 4216, 4294, 5170, 6885, 5608, 207, 11184, 3717, 1020, 1616, 994, 5590, 7098, 10912, 5573, 894, 2185	770	105	3656	1.80878	0.259514	0.00209883	0.162655
GOTERM_BP_FAT	GO:0001932~regulation of protein amino acid phosphorylation	31	3.77129	9.33386e-05	3725, 4188, 1956, 5663, 8764, 3172, 5515, 5518, 8737, 3486, 5585, 578, 7046, 5580, 4092, 659, 595, 4217, 5300, 3059, 581, 4294, 857, 11184, 3717, 1616, 5590, 5573, 8312, 894, 2185	770	74	3656	1.98905	0.269621	0.00217951	0.17009
GOTERM_BP_FAT	GO:0030308~negative regulation of cell growth	18	2.18978	9.86604e-05	1601, 29950, 1410, 57142, 694, 3621, 5925, 1027, 5468, 1026, 7157, 11007, 3172, 5515, 5518, 4088, 54825, 604	770	33	3656	2.58985	0.28259	0.00228778	0.179779
GOTERM_BP_FAT	GO:0016570~histone modification	27	3.28467	0.000101746	10524, 2033, 10856, 8841, 2648, 10014, 6045, 7334, 1387, 6314, 86, 9252, 6839, 5245, 9759, 10419, 8607, 64769, 53615, 10933, 10498, 55929, 3065, 3066, 8295, 11143, 23411	770	61	3656	2.1016	0.290002	0.0023431	0.185397
GOTERM_BP_FAT	GO:0008624~induction of apoptosis by extracellular signals	27	3.28467	0.000101746	843, 841, 5599, 5663, 26574, 23421, 7189, 8738, 11035, 8772, 8837, 8795, 8878, 572, 10018, 8718, 5601, 4217, 695, 581, 11214, 7409, 836, 1616, 7074, 7531, 5879	770	61	3656	2.1016	0.290002	0.0023431	0.185397
GOTERM_BP_FAT	GO:0048598~embryonic morphogenesis	36	4.37956	0.000117167	2131, 841, 5087, 6597, 5916, 4851, 7709, 7249, 2768, 5663, 8200, 1499, 7189, 7041, 6927, 6045, 7048, 6497, 7046, 659, 1856, 3205, 5629, 90, 6885, 7157, 55578, 5979, 5573, 8452, 4088, 5451, 4609, 4086, 6934, 4087	770	92	3656	1.85793	0.32592	0.00267944	0.213467
GOTERM_BP_FAT	GO:0001933~negative regulation of protein amino acid phosphorylation	12	1.45985	0.000117811	3725, 3172, 5590, 5515, 5518, 3486, 581, 5663, 857, 578, 4092, 5580	770	17	3656	3.35157	0.32738	0.00267598	0.21464
GOTERM_BP_FAT	GO:0042326~negative regulation of phosphorylation	15	1.82482	0.000127955	3725, 581, 5663, 1027, 857, 1026, 5590, 3172, 5515, 5518, 3486, 6314, 578, 4092, 5580	770	25	3656	2.84883	0.349961	0.00288659	0.233101
GOTERM_BP_FAT	GO:0019216~regulation of lipid metabolic process	24	2.91971	0.000129315	7536, 55437, 2908, 8721, 5629, 10273, 5925, 857, 6794, 5468, 207, 5465, 51085, 3172, 5934, 6777, 3667, 7068, 6776, 7376, 4790, 10062, 5879, 998	770	52	3656	2.19141	0.352931	0.00289781	0.235576
GOTERM_BP_FAT	GO:0003006~reproductive developmental process	35	4.25791	0.000133038	7536, 9319, 3148, 5087, 8204, 6927, 3480, 4090, 2175, 578, 10018, 23139, 6662, 595, 599, 598, 2309, 581, 4436, 90, 26271, 207, 10370, 994, 6198, 8312, 6777, 894, 6776, 891, 2185, 5591, 898, 23411, 6934	770	89	3656	1.86721	0.360991	0.00296141	0.242351
GOTERM_BP_FAT	GO:0032147~activation of protein kinase activity	23	2.79805	0.000138103	55437, 8517, 2149, 1956, 4216, 5663, 5170, 6885, 11184, 3717, 7189, 4616, 2771, 5590, 7098, 10912, 5573, 8795, 8877, 2185, 7048, 3654, 7046	770	49	3656	2.22868	0.371793	0.00305378	0.251566
GOTERM_BP_FAT	GO:0031668~cellular response to extracellular stimulus	16	1.94647	0.0001438	659, 3725, 5663, 8678, 857, 166, 1026, 3309, 8061, 7157, 7391, 93649, 6720, 2353, 898, 23411	770	28	3656	2.71317	0.383728	0.00315884	0.261932
GOTERM_BP_FAT	GO:0070302~regulation of stress-activated protein kinase signaling pathway	19	2.31144	0.000160191	4217, 9611, 4188, 8767, 4294, 23542, 6885, 8841, 207, 11184, 939, 1616, 28996, 7098, 8737, 8312, 51347, 2185, 5585	770	37	3656	2.43819	0.416812	0.00349547	0.291745
GOTERM_BP_FAT	GO:0008637~apoptotic mitochondrial changes	13	1.58151	0.000162043	3725, 840, 598, 51100, 581, 207, 7157, 836, 5366, 27113, 4088, 578, 4609	770	20	3656	3.08623	0.420436	0.00351304	0.295114
GOTERM_BP_FAT	GO:0008361~regulation of cell size	31	3.77129	0.000166042	1601, 29950, 1410, 2033, 5916, 7249, 3621, 1027, 1026, 3172, 5515, 5518, 8877, 7046, 604, 57142, 694, 55914, 4869, 1019, 5925, 1385, 5468, 207, 7157, 11007, 4088, 2185, 900, 54825, 4692	770	76	3656	1.93671	0.428187	0.00357656	0.302386
GOTERM_BP_FAT	GO:0009968~negative regulation of signal transduction	35	4.25791	0.000171772	59307, 4188, 5970, 7249, 8841, 7041, 28996, 3172, 5515, 5518, 58533, 3486, 6314, 51347, 6497, 604, 4092, 5580, 811, 595, 10140, 5300, 9611, 2065, 90, 857, 207, 5590, 8312, 7128, 5338, 8313, 3667, 4792, 23411	770	90	3656	1.84646	0.439112	0.00367624	0.312806
GOTERM_BP_FAT	GO:0010648~negative regulation of cell communication	36	4.37956	0.000193146	59307, 4188, 5970, 7249, 8841, 2771, 7041, 28996, 3172, 5515, 5518, 58533, 3486, 6314, 51347, 6497, 604, 4092, 5580, 811, 595, 10140, 5300, 9611, 2065, 90, 857, 207, 5590, 8312, 7128, 5338, 8313, 3667, 4792, 23411	770	94	3656	1.8184	0.478054	0.00410668	0.351665
GOTERM_BP_FAT	GO:0043392~negative regulation of DNA binding	16	1.94647	0.000240687	5087, 59307, 4188, 5629, 9759, 3398, 6188, 3717, 3172, 7341, 3066, 7067, 3654, 4792, 4092, 23411	770	29	3656	2.61961	0.555253	0.00508295	0.438044
GOTERM_BP_FAT	GO:0007166~cell surface receptor linked signal transduction	113	13.747	0.000242488	3725, 6774, 6558, 2149, 6772, 330, 4615, 3480, 8877, 6497, 10140, 5747, 9252, 7409, 6885, 1385, 3716, 166, 51567, 207, 939, 3717, 409, 10628, 8312, 7074, 8313, 6777, 6776, 4792, 4692, 7554, 4690, 1459, 1432, 19, 26060, 2768, 10273, 10672, 8764, 7189, 7041, 2771, 28996, 3516, 7334, 1500, 8440, 4090, 7048, 819, 7046, 4092, 595, 5764, 2308, 329, 90, 9564, 51588, 23495, 2185, 3932, 5894, 6464, 4851, …	770	399	3656	1.34469	0.557942	0.00508897	0.441316
GOTERM_BP_FAT	GO:0008629~induction of apoptosis by intracellular signals	17	2.06813	0.000248741	11200, 4292, 581, 25, 1026, 27429, 7157, 836, 3717, 8930, 28996, 27113, 8454, 8452, 2956, 4609, 602	770	32	3656	2.5224	0.567151	0.00518753	0.452671
GOTERM_BP_FAT	GO:0048585~negative regulation of response to stimulus	17	2.06813	0.000248741	9611, 5970, 8841, 166, 5468, 7133, 207, 6188, 5465, 2, 5590, 51347, 3667, 6778, 604, 5580, 23411	770	32	3656	2.5224	0.567151	0.00518753	0.452671
GOTERM_BP_FAT	GO:0043408~regulation of MAPKKK cascade	23	2.79805	0.000281268	4217, 9611, 10174, 2149, 4188, 8767, 4294, 23542, 857, 6885, 8841, 207, 11184, 1499, 939, 1616, 28996, 7098, 8737, 8312, 51347, 2185, 5585	770	51	3656	2.14128	0.61205	0.00582789	0.511721
GOTERM_BP_FAT	GO:0007507~heart development	33	4.0146	0.000286086	7003, 6722, 841, 4331, 840, 23054, 6597, 2033, 4851, 7249, 5663, 1499, 10014, 3516, 7048, 7046, 4092, 6662, 1857, 1856, 2065, 5629, 90, 6257, 3398, 6256, 1855, 836, 10370, 93649, 4772, 5591, 4087	770	85	3656	1.84336	0.618293	0.00589118	0.520465
GOTERM_BP_FAT	GO:0007050~cell cycle arrest	22	2.6764	0.00030477	811, 580, 2081, 4436, 23645, 5925, 6794, 5608, 1027, 11186, 1026, 5036, 7157, 1033, 8454, 1647, 8452, 4088, 10657, 4609, 7251, 6934	770	48	3656	2.17619	0.641566	0.00623664	0.554367
GOTERM_BP_FAT	GO:0032774~RNA biosynthetic process	55	6.691	0.00032197	4149, 9968, 688, 6772, 6621, 196, 6872, 23650, 2648, 1051, 7391, 7068, 7067, 10302, 9611, 5926, 2908, 3091, 6882, 1385, 8061, 9111, 9015, 2113, 4790, 9439, 5452, 4609, 3661, 9319, 4331, 23054, 2071, 5465, 7041, 3174, 8812, 4800, 6908, 4780, 9325, 659, 328, 2305, 7157, 10987, 2963, 8805, 1022, 2962, 2960, 4772, 4335, 3665, 142	770	167	3656	1.56373	0.661735	0.00654771	0.585567
GOTERM_BP_FAT	GO:0006351~transcription, DNA-dependent	55	6.691	0.00032197	4149, 9968, 688, 6772, 6621, 196, 6872, 23650, 2648, 1051, 7391, 7068, 7067, 10302, 9611, 5926, 2908, 3091, 6882, 1385, 8061, 9111, 9015, 2113, 4790, 9439, 5452, 4609, 3661, 9319, 4331, 23054, 2071, 5465, 7041, 3174, 8812, 4800, 6908, 4780, 9325, 659, 328, 2305, 7157, 10987, 2963, 8805, 1022, 2962, 2960, 4772, 4335, 3665, 142	770	167	3656	1.56373	0.661735	0.00654771	0.585567
GOTERM_BP_FAT	GO:0051052~regulation of DNA metabolic process	25	3.04136	0.000322987	3725, 3265, 6464, 8741, 6188, 641, 6282, 3480, 5515, 7334, 5518, 2956, 604, 811, 958, 3836, 4292, 5883, 1017, 4436, 3014, 7157, 990, 6778, 4609	770	58	3656	2.04657	0.662891	0.00652889	0.587412
GOTERM_BP_FAT	GO:0042770~DNA damage response, signal transduction	21	2.55474	0.000327718	595, 10524, 11200, 890, 1432, 4292, 5883, 1111, 4436, 51499, 25, 3014, 7157, 641, 983, 8930, 28996, 27113, 2956, 9656, 602	770	45	3656	2.21576	0.668218	0.00658468	0.595991
GOTERM_BP_FAT	GO:0051345~positive regulation of hydrolase activity	29	3.52798	0.000365832	842, 2149, 1956, 6772, 2935, 7249, 10672, 6188, 81565, 27113, 8795, 11345, 2956, 7376, 578, 10062, 7486, 2081, 581, 4436, 10928, 7157, 3717, 5366, 5590, 4088, 2185, 3932, 4609	770	72	3656	1.91241	0.70818	0.00730425	0.665089
GOTERM_BP_FAT	GO:0002260~lymphocyte homeostasis	11	1.3382	0.000370339	8517, 581, 10673, 6777, 6776, 3551, 23495, 578, 10018, 207, 836	770	16	3656	3.26429	0.712574	0.00735031	0.673255
GOTERM_BP_FAT	GO:0043434~response to peptide hormone stimulus	27	3.28467	0.000465672	6774, 6772, 6464, 5970, 26060, 5465, 10014, 3480, 7391, 2065, 890, 2308, 598, 9564, 5170, 6256, 5468, 207, 3717, 6198, 5337, 3667, 6777, 894, 6776, 5591, 142	770	66	3656	1.94238	0.7915	0.00918005	0.845871
GOTERM_BP_FAT	GO:0033500~carbohydrate homeostasis	12	1.45985	0.000473566	57048, 51085, 7391, 6927, 6774, 2309, 3091, 3667, 572, 5468, 6194, 6934	770	19	3656	2.99877	0.79697	0.00928065	0.860153
GOTERM_BP_FAT	GO:0042593~glucose homeostasis	12	1.45985	0.000473566	57048, 51085, 7391, 6927, 6774, 2309, 3091, 3667, 572, 5468, 6194, 6934	770	19	3656	2.99877	0.79697	0.00928065	0.860153
GOTERM_BP_FAT	GO:0051301~cell division	51	6.20438	0.00048046	8881, 64151, 4851, 332, 10403, 983, 10393, 64682, 701, 7251, 5925, 1616, 121441, 4751, 5499, 51434, 29882, 4085, 4739, 311, 26574, 51343, 8812, 9126, 5347, 595, 8379, 9937, 890, 11065, 7150, 1017, 9564, 8607, 1019, 26271, 1020, 899, 994, 1022, 993, 990, 991, 894, 891, 900, 1163, 81928, 898, 998, 55142	770	154	3656	1.57241	0.801629	0.00936067	0.872622
GOTERM_BP_FAT	GO:0000279~M phase	52	6.32603	0.000493779	8881, 64151, 332, 10403, 8841, 22974, 5536, 983, 10393, 64682, 2956, 701, 9611, 7283, 4292, 5925, 25788, 121441, 4751, 51434, 29882, 4085, 9156, 9319, 4739, 10270, 6790, 51343, 8812, 9126, 5347, 2175, 8379, 9937, 11065, 890, 1111, 1017, 8607, 26271, 3014, 996, 899, 994, 993, 990, 9184, 991, 203068, 891, 900, 55142	770	158	3656	1.56265	0.81033	0.00956364	0.89671
GOTERM_BP_FAT	GO:0006469~negative regulation of protein kinase activity	20	2.43309	0.000504533	7249, 5663, 5170, 5925, 857, 1027, 1855, 1026, 207, 836, 4616, 80824, 10912, 5515, 1647, 5518, 58533, 9467, 7532, 57761	770	43	3656	2.2084	0.817077	0.00971507	0.916154
GOTERM_BP_FAT	GO:0000082~G1/S transition of mitotic cell cycle	18	2.18978	0.000570743	4863, 595, 4331, 1956, 2935, 90, 1019, 5925, 1027, 1026, 207, 1033, 8454, 993, 8452, 894, 4772, 898	770	37	3656	2.30986	0.853638	0.0109209	1.03579
GOTERM_BP_FAT	GO:0001568~blood vessel development	36	4.37956	0.000606599	3725, 1003, 6722, 841, 688, 1432, 7026, 6597, 4851, 8741, 10672, 5663, 960, 8841, 1499, 3516, 5327, 7048, 7046, 578, 4092, 57142, 5747, 2308, 5629, 581, 90, 3091, 6885, 857, 207, 10370, 93649, 2185, 4691, 6934	770	99	3656	1.72656	0.870287	0.0115376	1.10052
GOTERM_BP_FAT	GO:0051259~protein oligomerization	29	3.52798	0.000617693	1410, 841, 3265, 6240, 7249, 6241, 330, 9361, 3728, 5536, 1499, 641, 3480, 8772, 5987, 6497, 84708, 3654, 9043, 7529, 329, 4869, 581, 5092, 857, 7157, 7132, 5590, 3667	770	74	3656	1.86072	0.875044	0.0116815	1.12054
GOTERM_BP_FAT	GO:0048545~response to steroid hormone stimulus	28	3.40633	0.000702448	1410, 3148, 6774, 2033, 5970, 1026, 768, 1499, 6790, 7048, 2026, 7046, 595, 890, 6256, 857, 5468, 8061, 4982, 133522, 2, 10628, 6198, 6777, 894, 2353, 898, 5594	770	71	3656	1.87247	0.906076	0.0132001	1.27337
GOTERM_BP_FAT	GO:0033673~negative regulation of kinase activity	20	2.43309	0.000716304	7249, 5663, 5170, 5925, 857, 1027, 1855, 1026, 207, 836, 4616, 80824, 10912, 5515, 1647, 5518, 58533, 9467, 7532, 57761	770	44	3656	2.15821	0.910359	0.0133842	1.29833
GOTERM_BP_FAT	GO:0032868~response to insulin stimulus	20	2.43309	0.000716304	2065, 2308, 6464, 6772, 5970, 26060, 9564, 5170, 6256, 5468, 207, 5465, 10014, 7391, 3480, 6198, 3667, 894, 5591, 142	770	44	3656	2.15821	0.910359	0.0133842	1.29833
GOTERM_BP_FAT	GO:0006310~DNA recombination	23	2.79805	0.00073541	7486, 9319, 4841, 23054, 4292, 3146, 7011, 10856, 1111, 4436, 8607, 3159, 3014, 25788, 6421, 641, 3516, 7334, 546, 2956, 2547, 5591, 9156	770	54	3656	2.02232	0.915946	0.013663	1.33274
GOTERM_BP_FAT	GO:0001944~vasculature development	36	4.37956	0.000749932	3725, 1003, 6722, 841, 688, 1432, 7026, 6597, 4851, 8741, 10672, 5663, 960, 8841, 1499, 3516, 5327, 7048, 7046, 578, 4092, 57142, 5747, 2308, 5629, 581, 90, 3091, 6885, 857, 207, 10370, 93649, 2185, 4691, 6934	770	100	3656	1.7093	0.919959	0.0138546	1.35889
GOTERM_BP_FAT	GO:0006511~ubiquitin-dependent protein catabolic process	45	5.47445	0.00079805	5717, 64750, 8881, 4738, 10273, 5682, 5685, 5683, 983, 6500, 9491, 7041, 10393, 64682, 51343, 25793, 10197, 8878, 1540, 701, 26994, 84708, 5886, 7874, 7251, 57646, 11065, 5708, 5691, 5693, 5700, 5701, 51366, 996, 7347, 5688, 8454, 8452, 991, 9184, 51434, 891, 29882, 83737, 4085	770	134	3656	1.5945	0.931936	0.014657	1.44548
GOTERM_BP_FAT	GO:0045884~regulation of survival gene product expression	9	1.09489	0.000814202	4208, 598, 581, 10673, 6777, 6776, 7046, 207, 4609	770	12	3656	3.56104	0.935541	0.0148704	1.47453
GOTERM_BP_FAT	GO:0010743~regulation of foam cell differentiation	9	1.09489	0.000814202	5601, 5465, 4023, 19, 7376, 4790, 5468, 4792, 10062	770	12	3656	3.56104	0.935541	0.0148704	1.47453
GOTERM_BP_FAT	GO:0043161~proteasomal ubiquitin-dependent protein catabolic process	28	3.40633	0.000904417	5717, 8881, 5682, 10273, 5685, 5683, 983, 10393, 9491, 64682, 10197, 701, 5886, 11065, 5708, 5691, 5693, 5700, 5701, 996, 5688, 8452, 9184, 991, 51434, 29882, 891, 4085	770	72	3656	1.84646	0.952434	0.0164162	1.63664
GOTERM_BP_FAT	GO:0010498~proteasomal protein catabolic process	28	3.40633	0.000904417	5717, 8881, 5682, 10273, 5685, 5683, 983, 10393, 9491, 64682, 10197, 701, 5886, 11065, 5708, 5691, 5693, 5700, 5701, 996, 5688, 8452, 9184, 991, 51434, 29882, 891, 4085	770	72	3656	1.84646	0.952434	0.0164162	1.63664
GOTERM_BP_FAT	GO:0051348~negative regulation of transferase activity	21	2.55474	0.000906907	7249, 5663, 5170, 5925, 857, 1027, 5468, 1855, 1026, 207, 836, 4616, 80824, 10912, 5515, 1647, 5518, 58533, 9467, 7532, 57761	770	48	3656	2.07727	0.952832	0.0163728	1.64111
GOTERM_BP_FAT	GO:0002764~immune response-regulating signal transduction	16	1.94647	0.000927652	958, 8517, 5970, 8767, 5663, 9564, 6885, 7189, 4615, 7098, 7334, 2534, 3654, 4792, 51324, 5594	770	32	3656	2.37403	0.956016	0.016655	1.67835
GOTERM_BP_FAT	GO:0043433~negative regulation of transcription factor activity	14	1.70316	0.000955991	5087, 59307, 5629, 9759, 3398, 6188, 3172, 7341, 3066, 7067, 3654, 4792, 4092, 23411	770	26	3656	2.55664	0.960021	0.0170687	1.7292
GOTERM_BP_FAT	GO:0009991~response to extracellular stimulus	31	3.77129	0.000971602	3725, 6772, 5916, 5970, 5663, 8678, 1026, 960, 5465, 2771, 7391, 7048, 659, 595, 6256, 857, 5468, 166, 3309, 207, 8061, 4982, 7157, 2, 6198, 6223, 93649, 6720, 2353, 898, 23411	770	83	3656	1.77337	0.96207	0.0172537	1.7572
GOTERM_BP_FAT	GO:0000075~cell cycle checkpoint	23	2.79805	0.000987722	595, 8379, 11200, 890, 1432, 5883, 1111, 4436, 332, 2071, 5925, 51499, 3014, 7157, 641, 983, 990, 9184, 9587, 701, 8295, 4085, 9656	770	55	3656	1.98555	0.964075	0.0174456	1.78611
GOTERM_BP_FAT	GO:0065003~macromolecular complex assembly	89	10.8273	0.00101131	1410, 7536, 841, 9968, 3148, 7249, 330, 6872, 7454, 8576, 5536, 3728, 641, 3480, 8772, 5987, 92815, 1387, 6418, 6497, 10302, 9043, 5747, 4194, 7283, 4292, 581, 6882, 23542, 96764, 1855, 10471, 7132, 5590, 4088, 9439, 5879, 2058, 4609, 4086, 4087, 4690, 4331, 3265, 1434, 23054, 8518, 7514, 19, 6240, 6241, 2071, 9361, 1499, 3320, 7277, 5518, 6908, 51194, 8440, 2175, 84708, 3654, 22920, 811, 958, 68…	770	312	3656	1.35441	0.966819	0.0177655	1.82839
GOTERM_BP_FAT	GO:0043388~positive regulation of DNA binding	19	2.31144	0.00109687	6598, 6597, 2033, 4869, 5970, 8721, 8767, 9759, 3551, 8202, 3717, 10014, 4615, 28996, 7098, 7334, 8737, 6497, 3654	770	42	3656	2.14793	0.97513	0.0191549	1.98162
GOTERM_BP_FAT	GO:0048641~regulation of skeletal muscle tissue development	10	1.21655	0.00112626	10014, 694, 6198, 3486, 93649, 4851, 3065, 90, 9759, 8841	770	15	3656	3.16537	0.977475	0.019562	2.0342
GOTERM_BP_FAT	GO:0010883~regulation of lipid storage	8	0.973236	0.00117034	5465, 4023, 19, 7376, 4790, 5468, 4792, 10062	770	10	3656	3.79844	0.980584	0.0202161	2.11302
GOTERM_BP_FAT	GO:0001782~B cell homeostasis	8	0.973236	0.00117034	8517, 581, 10673, 3551, 23495, 578, 10018, 836	770	10	3656	3.79844	0.980584	0.0202161	2.11302
GOTERM_BP_FAT	GO:0006281~DNA repair	50	6.08273	0.00125392	3148, 3146, 10856, 6421, 641, 8930, 50484, 2956, 5886, 9656, 7486, 4841, 580, 4292, 5883, 25, 25788, 51567, 10912, 546, 7341, 5591, 23411, 9156, 10524, 9319, 4331, 11073, 23054, 2071, 1647, 9126, 7334, 2175, 9978, 9937, 10519, 328, 1111, 4436, 7153, 3014, 6996, 7157, 27301, 10933, 1022, 2237, 2547, 142	770	156	3656	1.52181	0.98535	0.0215346	2.2623
GOTERM_BP_FAT	GO:0032869~cellular response to insulin stimulus	17	2.06813	0.00128895	2065, 2308, 6464, 6772, 26060, 9564, 5170, 6256, 5468, 207, 10014, 7391, 3480, 3667, 894, 5591, 142	770	36	3656	2.24214	0.986982	0.0220176	2.32479
GOTERM_BP_FAT	GO:0002757~immune response-activating signal transduction	15	1.82482	0.00144733	8517, 5970, 8767, 9564, 5663, 6885, 7189, 4615, 7098, 7334, 2534, 3654, 4792, 51324, 5594	770	30	3656	2.37403	0.992367	0.0245669	2.60691
GOTERM_BP_FAT	GO:0001889~liver development	14	1.70316	0.00149401	595, 2033, 4851, 5629, 5970, 6256, 382, 8841, 1499, 6927, 10370, 6777, 894, 898	770	27	3656	2.46195	0.993478	0.0252226	2.68991
GOTERM_BP_FAT	GO:0031663~lipopolysaccharide-mediated signaling pathway	7	0.851582	0.00161019	3661, 1432, 6772, 8767, 3654, 4792, 5594	770	8	3656	4.15455	0.995592	0.0270234	2.89619
GOTERM_BP_FAT	GO:0000280~nuclear division	40	4.86618	0.00162714	8881, 64151, 4739, 332, 10403, 10270, 22974, 5536, 6790, 983, 10393, 64682, 51343, 9126, 8812, 5347, 701, 8379, 9937, 11065, 890, 1017, 8607, 26271, 996, 899, 994, 121441, 993, 990, 4751, 991, 9184, 51434, 203068, 29882, 891, 900, 4085, 55142	770	119	3656	1.59598	0.995837	0.0271689	2.92626
GOTERM_BP_FAT	GO:0007067~mitosis	40	4.86618	0.00162714	8881, 64151, 4739, 332, 10403, 10270, 22974, 5536, 6790, 983, 10393, 64682, 51343, 9126, 8812, 5347, 701, 8379, 9937, 11065, 890, 1017, 8607, 26271, 996, 899, 994, 121441, 993, 990, 4751, 991, 9184, 51434, 203068, 29882, 891, 900, 4085, 55142	770	119	3656	1.59598	0.995837	0.0271689	2.92626
GOTERM_BP_FAT	GO:0045786~negative regulation of cell cycle	18	2.18978	0.00167815	5796, 1956, 6597, 7709, 5925, 1027, 1026, 8841, 7157, 836, 1020, 3172, 4088, 3065, 3066, 2113, 604, 4085	770	40	3656	2.13662	0.996494	0.0278711	3.01666
GOTERM_BP_FAT	GO:0048729~tissue morphogenesis	24	2.91971	0.00196248	659, 841, 1856, 1147, 5087, 6597, 4851, 5629, 90, 7249, 6256, 6885, 960, 768, 1499, 7189, 6927, 7041, 5979, 5573, 4088, 4092, 4086, 4087	770	61	3656	1.86809	0.998656	0.0323613	3.51919
GOTERM_BP_FAT	GO:0051091~positive regulation of transcription factor activity	16	1.94647	0.00199194	6598, 6597, 2033, 4869, 5970, 8767, 9759, 3551, 8202, 3717, 10014, 4615, 7098, 7334, 8737, 3654	770	34	3656	2.23438	0.998783	0.0326796	3.5711
GOTERM_BP_FAT	GO:0031098~stress-activated protein kinase signaling pathway	16	1.94647	0.00199194	4217, 5601, 55437, 1410, 5599, 11221, 4188, 4216, 4294, 23542, 11184, 6416, 1616, 8737, 51347, 5585	770	34	3656	2.23438	0.998783	0.0326796	3.5711
GOTERM_BP_FAT	GO:0043009~chordate embryonic development	41	4.98783	0.00199236	1601, 6722, 3219, 841, 8533, 5087, 23054, 6597, 2033, 7249, 2768, 10672, 5663, 2648, 7189, 81565, 1051, 5801, 6927, 3516, 60626, 7048, 7046, 10018, 1856, 3205, 598, 5629, 90, 3091, 4436, 6885, 1855, 53615, 7157, 10370, 8452, 8313, 5591, 6934, 4087	770	124	3656	1.56992	0.998785	0.0325281	3.57185
GOTERM_BP_FAT	GO:0048285~organelle fission	41	4.98783	0.00199236	8881, 64151, 4739, 332, 10403, 10270, 22974, 5536, 6790, 983, 10393, 64682, 51343, 9126, 8812, 5347, 701, 8379, 9937, 11065, 890, 581, 1017, 8607, 26271, 996, 899, 994, 121441, 993, 990, 4751, 991, 9184, 203068, 51434, 29882, 891, 900, 4085, 55142	770	124	3656	1.56992	0.998785	0.0325281	3.57185
GOTERM_BP_FAT	GO:0009792~embryonic development ending in birth or egg hatching	41	4.98783	0.00199236	1601, 6722, 3219, 841, 8533, 5087, 23054, 6597, 2033, 7249, 2768, 10672, 5663, 2648, 7189, 81565, 1051, 5801, 6927, 3516, 60626, 7048, 7046, 10018, 1856, 3205, 598, 5629, 90, 3091, 4436, 6885, 1855, 53615, 7157, 10370, 8452, 8313, 5591, 6934, 4087	770	124	3656	1.56992	0.998785	0.0325281	3.57185
GOTERM_BP_FAT	GO:0050732~negative regulation of peptidyl-tyrosine phosphorylation	6	0.729927	0.00201865	3172, 5590, 5515, 5518, 857, 5580	770	6	3656	4.74805	0.998888	0.0327917	3.61817
GOTERM_BP_FAT	GO:0010885~regulation of cholesterol storage	6	0.729927	0.00201865	5465, 4023, 19, 7376, 5468, 10062	770	6	3656	4.74805	0.998888	0.0327917	3.61817
GOTERM_BP_FAT	GO:0043933~macromolecular complex subunit organization	91	11.0706	0.00204381	1410, 7536, 841, 9968, 3148, 7249, 330, 6872, 7454, 8576, 5536, 3728, 641, 3480, 8772, 5987, 92815, 1387, 6418, 6497, 10302, 9043, 5747, 4194, 4292, 7283, 581, 6882, 23542, 96764, 1855, 10471, 7132, 5590, 4088, 9439, 5879, 2058, 6605, 4609, 4086, 4087, 4690, 4331, 3265, 4023, 1434, 23054, 8518, 7514, 19, 6240, 6241, 2071, 9361, 1499, 3320, 7277, 5518, 6908, 51194, 8440, 2175, 84708, 3654, 22920, …	770	327	3656	1.32132	0.998979	0.0330348	3.66247
GOTERM_BP_FAT	GO:0043331~response to dsRNA	10	1.21655	0.00209816	3661, 7098, 6772, 4088, 8767, 4792, 4086, 5594, 4087, 5366	770	16	3656	2.96753	0.99915	0.0337373	3.75811
GOTERM_BP_FAT	GO:0000060~protein import into nucleus, translocation	10	1.21655	0.00209816	3725, 10140, 2149, 4792, 604, 207, 7157, 5594, 3717, 602	770	16	3656	2.96753	0.99915	0.0337373	3.75811
GOTERM_BP_FAT	GO:0030278~regulation of ossification	15	1.82482	0.00213738	659, 10140, 5087, 90, 3727, 1499, 8313, 4088, 4090, 7068, 2185, 2101, 6497, 4086, 6662	770	31	3656	2.29744	0.999255	0.0341946	3.82708
GOTERM_BP_FAT	GO:0000087~M phase of mitotic cell cycle	40	4.86618	0.00229654	8881, 64151, 4739, 332, 10403, 10270, 22974, 5536, 6790, 983, 10393, 64682, 51343, 9126, 8812, 5347, 701, 8379, 9937, 11065, 890, 1017, 8607, 26271, 996, 899, 994, 121441, 993, 990, 4751, 991, 9184, 51434, 203068, 29882, 891, 900, 4085, 55142	770	121	3656	1.5696	0.999565	0.0365233	4.10644
GOTERM_BP_FAT	GO:0001776~leukocyte homeostasis	11	1.3382	0.00229806	8517, 581, 10673, 6777, 6776, 3551, 23495, 578, 10018, 207, 836	770	19	3656	2.74887	0.999567	0.0363754	4.10911
GOTERM_BP_FAT	GO:0043281~regulation of caspase activity	17	2.06813	0.00256496	842, 2149, 6772, 581, 2935, 332, 3309, 6188, 7157, 5366, 27113, 8795, 4088, 572, 578, 3932, 4609	770	38	3656	2.12413	0.999824	0.0403297	4.57587
GOTERM_BP_FAT	GO:0032870~cellular response to hormone stimulus	25	3.04136	0.00278351	6774, 6464, 6772, 26060, 10014, 3480, 7391, 7067, 2065, 2308, 9564, 5170, 6256, 5468, 207, 3717, 6198, 5573, 3667, 6777, 6776, 894, 2353, 5591, 142	770	66	3656	1.7985	0.999916	0.043492	4.95646
GOTERM_BP_FAT	GO:0051270~regulation of cell motion	31	3.77129	0.00279917	2149, 1956, 10672, 1027, 10014, 3480, 3486, 8877, 7046, 87, 604, 4092, 9043, 5796, 57142, 3091, 9564, 207, 3717, 1020, 10370, 6198, 5337, 6223, 4088, 3667, 6777, 2113, 2185, 5879, 5594	770	88	3656	1.67261	0.99992	0.0435299	4.98368
GOTERM_BP_FAT	GO:0046777~protein amino acid autophosphorylation	19	2.31144	0.00280327	5747, 2081, 1956, 4215, 4294, 6872, 207, 5610, 3717, 1020, 3480, 8805, 8737, 4751, 51347, 2534, 5598, 3654, 7046	770	45	3656	2.00473	0.999921	0.0433922	4.99081
GOTERM_BP_FAT	GO:0051099~positive regulation of binding	19	2.31144	0.00280327	6598, 6597, 2033, 4869, 5970, 8721, 8767, 9759, 3551, 8202, 3717, 10014, 4615, 28996, 7098, 7334, 8737, 6497, 3654	770	45	3656	2.00473	0.999921	0.0433922	4.99081
GOTERM_BP_FAT	GO:0032386~regulation of intracellular transport	15	1.82482	0.00307829	1410, 580, 4188, 2932, 939, 3717, 1020, 3172, 4601, 4088, 7046, 10657, 4792, 23411, 602	770	32	3656	2.22565	0.999969	0.0473359	5.46754
GOTERM_BP_FAT	GO:0048872~homeostasis of number of cells	18	2.18978	0.00314647	8517, 3059, 2149, 581, 10673, 3398, 3551, 5925, 23495, 207, 836, 6223, 4090, 6777, 6776, 578, 10018, 604	770	42	3656	2.03488	0.999975	0.0481408	5.58539
GOTERM_BP_FAT	GO:0048514~blood vessel morphogenesis	30	3.64964	0.00322835	3725, 6722, 841, 688, 1432, 7026, 6597, 4851, 8741, 10672, 8841, 1499, 3516, 5327, 7048, 578, 7046, 4092, 57142, 5747, 581, 5629, 90, 3091, 857, 6885, 10370, 93649, 2185, 4691	770	85	3656	1.67578	0.999981	0.0491414	5.72673
GOTERM_BP_FAT	GO:0002520~immune system development	41	4.98783	0.00325076	6146, 841, 5971, 1147, 5087, 23054, 5663, 641, 1499, 10014, 7189, 8792, 4090, 2956, 7048, 7046, 578, 10018, 604, 602, 3205, 3059, 4292, 581, 4436, 9759, 3398, 5925, 5468, 7157, 3717, 1880, 6223, 6777, 6776, 4791, 2547, 5591, 3932, 998, 9156	770	127	3656	1.53284	0.999983	0.0492522	5.76538
GOTERM_BP_FAT	GO:0000018~regulation of DNA recombination	9	1.09489	0.00329628	958, 3836, 4292, 8741, 4436, 2956, 6778, 604, 641	770	14	3656	3.05232	0.999985	0.0497022	5.84383
GOTERM_BP_FAT	GO:0042594~response to starvation	9	1.09489	0.00329628	3725, 659, 6720, 5663, 8678, 857, 3309, 23411, 7157	770	14	3656	3.05232	0.999985	0.0497022	5.84383
GOTERM_BP_FAT	GO:0009267~cellular response to starvation	9	1.09489	0.00329628	3725, 659, 6720, 5663, 8678, 857, 3309, 23411, 7157	770	14	3656	3.05232	0.999985	0.0497022	5.84383
GOTERM_BP_FAT	GO:0032535~regulation of cellular component size	35	4.25791	0.00331985	29950, 1601, 1410, 2033, 5916, 7249, 3621, 382, 1027, 1026, 3172, 5515, 5518, 8440, 8877, 7046, 604, 694, 57142, 55914, 4869, 1019, 5925, 1385, 5468, 207, 7157, 11007, 4088, 2185, 900, 54825, 5879, 4692, 4690	770	104	3656	1.5979	0.999986	0.0498264	5.88443
GOTERM_BP_FAT	GO:0006919~activation of caspase activity	14	1.70316	0.00332282	842, 2149, 6772, 581, 2935, 6188, 7157, 5366, 27113, 8795, 4088, 578, 3932, 4609	770	29	3656	2.29216	0.999986	0.049649	5.88954
GOTERM_BP_FAT	GO:0010952~positive regulation of peptidase activity	14	1.70316	0.00332282	842, 2149, 6772, 581, 2935, 6188, 7157, 5366, 27113, 8795, 4088, 578, 3932, 4609	770	29	3656	2.29216	0.999986	0.049649	5.88954
GOTERM_BP_FAT	GO:0043280~positive regulation of caspase activity	14	1.70316	0.00332282	842, 2149, 6772, 581, 2935, 6188, 7157, 5366, 27113, 8795, 4088, 578, 3932, 4609	770	29	3656	2.29216	0.999986	0.049649	5.88954
GOTERM_BP_FAT	GO:0016573~histone acetylation	13	1.58151	0.00353593	10524, 2033, 10856, 8607, 64769, 53615, 2648, 10933, 55929, 1387, 11143, 8295, 86	770	26	3656	2.37403	0.999993	0.0525208	6.25585
GOTERM_BP_FAT	GO:0045637~regulation of myeloid cell differentiation	13	1.58151	0.00353593	3725, 1432, 2309, 3091, 3398, 5925, 1499, 7098, 6777, 2113, 6776, 2101, 4792	770	26	3656	2.37403	0.999993	0.0525208	6.25585
GOTERM_BP_FAT	GO:0010565~regulation of cellular ketone metabolic process	13	1.58151	0.00353593	55437, 5629, 2908, 6794, 857, 5468, 207, 5465, 51085, 3172, 3667, 7376, 10062	770	26	3656	2.37403	0.999993	0.0525208	6.25585
GOTERM_BP_FAT	GO:0010741~negative regulation of protein kinase cascade	10	1.21655	0.00363611	9611, 3172, 5515, 5518, 7128, 51347, 7249, 857, 8841, 207	770	17	3656	2.79297	0.999995	0.0537342	6.42759
GOTERM_BP_FAT	GO:0048634~regulation of muscle development	12	1.45985	0.00368926	10014, 694, 6198, 3486, 93649, 4851, 4088, 3065, 90, 9759, 7048, 8841	770	23	3656	2.47724	0.999996	0.0542616	6.51857
GOTERM_BP_FAT	GO:0016202~regulation of striated muscle tissue development	12	1.45985	0.00368926	10014, 694, 6198, 3486, 93649, 4851, 4088, 3065, 90, 9759, 7048, 8841	770	23	3656	2.47724	0.999996	0.0542616	6.51857
GOTERM_BP_FAT	GO:0031669~cellular response to nutrient levels	11	1.3382	0.00374181	3725, 659, 7391, 6720, 5663, 8678, 857, 3309, 898, 23411, 7157	770	20	3656	2.61143	0.999997	0.0547755	6.60845
GOTERM_BP_FAT	GO:0007172~signal complex assembly	7	0.851582	0.00397267	1020, 5747, 8440, 23542, 2185, 1855, 4690	770	9	3656	3.69293	0.999998	0.0578111	7.00235
GOTERM_BP_FAT	GO:0048599~oocyte development	7	0.851582	0.00397267	9319, 994, 8312, 2309, 891, 2185, 26271	770	9	3656	3.69293	0.999998	0.0578111	7.00235
GOTERM_BP_FAT	GO:0009994~oocyte differentiation	7	0.851582	0.00397267	9319, 994, 8312, 2309, 891, 2185, 26271	770	9	3656	3.69293	0.999998	0.0578111	7.00235
GOTERM_BP_FAT	GO:0007169~transmembrane receptor protein tyrosine kinase signaling pathway	32	3.89294	0.00426799	6774, 5894, 1956, 6464, 7249, 26060, 867, 3480, 8440, 5327, 819, 659, 5747, 2065, 55914, 9252, 2308, 23542, 9564, 1855, 207, 3717, 1020, 10628, 5979, 7074, 3667, 6777, 6776, 2185, 4692, 4690	770	94	3656	1.61636	0.999999	0.061716	7.50395
GOTERM_BP_FAT	GO:0007254~JNK cascade	15	1.82482	0.00433282	4217, 5601, 55437, 5599, 11221, 4188, 4216, 4294, 23542, 11184, 6416, 1616, 8737, 51347, 5585	770	33	3656	2.15821	1	0.0623584	7.61372
GOTERM_BP_FAT	GO:0032880~regulation of protein localization	23	2.79805	0.00462023	958, 7529, 580, 4188, 2932, 26060, 5170, 834, 207, 939, 3717, 7189, 1020, 5590, 3172, 4601, 7341, 4088, 396, 7046, 4792, 23411, 602	770	61	3656	1.79025	1	0.0660826	8.09888
GOTERM_BP_FAT	GO:0052548~regulation of endopeptidase activity	17	2.06813	0.00474537	842, 2149, 6772, 581, 2935, 332, 3309, 6188, 7157, 5366, 27113, 8795, 4088, 572, 578, 3932, 4609	770	40	3656	2.01792	1	0.0675286	8.30936
GOTERM_BP_FAT	GO:0043627~response to estrogen stimulus	17	2.06813	0.00474537	595, 1410, 6774, 890, 857, 5468, 4982, 1499, 6790, 10628, 6777, 894, 7048, 2026, 7046, 898, 5594	770	40	3656	2.01792	1	0.0675286	8.30936
GOTERM_BP_FAT	GO:0007369~gastrulation	14	1.70316	0.00475702	659, 2131, 7709, 90, 7157, 55578, 1499, 6927, 6045, 5573, 8452, 4088, 4086, 4087	770	30	3656	2.21576	1	0.0674049	8.32894
GOTERM_BP_FAT	GO:0060173~limb development	14	1.70316	0.00475702	3205, 7026, 5087, 6597, 4851, 581, 5916, 2768, 5663, 8200, 1499, 6927, 6497, 578	770	30	3656	2.21576	1	0.0674049	8.32894
GOTERM_BP_FAT	GO:0046822~regulation of nucleocytoplasmic transport	14	1.70316	0.00475702	580, 4188, 2932, 939, 3717, 1020, 3172, 4601, 4088, 7046, 10657, 4792, 23411, 602	770	30	3656	2.21576	1	0.0674049	8.32894
GOTERM_BP_FAT	GO:0048736~appendage development	14	1.70316	0.00475702	3205, 7026, 5087, 6597, 4851, 581, 5916, 2768, 5663, 8200, 1499, 6927, 6497, 578	770	30	3656	2.21576	1	0.0674049	8.32894
GOTERM_BP_FAT	GO:0048608~reproductive structure development	19	2.31144	0.00487451	595, 7536, 599, 3148, 598, 2309, 581, 4436, 8204, 6927, 6777, 894, 2175, 6776, 578, 10018, 898, 23411, 6662	770	47	3656	1.91943	1	0.0687264	8.52609
GOTERM_BP_FAT	GO:0007389~pattern specification process	27	3.28467	0.00495761	3219, 7026, 5087, 2033, 4188, 4851, 10672, 5663, 1499, 2648, 6045, 28996, 3516, 4090, 7048, 7046, 659, 7528, 1856, 3205, 90, 10370, 8312, 8313, 5591, 4086, 4087	770	76	3656	1.68681	1	0.0695686	8.66531
GOTERM_BP_FAT	GO:0046661~male sex differentiation	13	1.58151	0.00516946	595, 7536, 3148, 599, 598, 581, 4436, 4090, 6777, 6776, 2175, 10018, 6662	770	27	3656	2.2861	1	0.0721392	9.0193
GOTERM_BP_FAT	GO:0006473~protein amino acid acetylation	13	1.58151	0.00516946	10524, 2033, 10856, 8607, 64769, 53615, 2648, 10933, 55929, 1387, 11143, 8295, 86	770	27	3656	2.2861	1	0.0721392	9.0193
GOTERM_BP_FAT	GO:0030521~androgen receptor signaling pathway	13	1.58151	0.00516946	10524, 8554, 9968, 5925, 8202, 8204, 1499, 7041, 1616, 8648, 1022, 2274, 898	770	27	3656	2.2861	1	0.0721392	9.0193
GOTERM_BP_FAT	GO:0030856~regulation of epithelial cell differentiation	8	0.973236	0.0051876	595, 694, 4851, 6777, 6776, 857, 7046, 1499	770	12	3656	3.16537	1	0.0720857	9.04955
GOTERM_BP_FAT	GO:0042592~homeostatic process	68	8.27251	0.00530518	3725, 6722, 6774, 7295, 2149, 6558, 641, 51085, 6927, 7391, 1387, 572, 578, 604, 7486, 580, 581, 3091, 3398, 3551, 5925, 207, 836, 3717, 5590, 6223, 6777, 6776, 5591, 10728, 5879, 4086, 6194, 4609, 6934, 8517, 4023, 2033, 19, 10673, 5663, 10672, 1499, 3172, 4090, 10018, 4092, 811, 3059, 598, 328, 4869, 2309, 7011, 857, 23495, 5468, 7157, 4170, 57048, 1020, 8805, 2494, 3667, 2547, 2185, 3932, 142	770	240	3656	1.34528	1	0.0733603	9.2454
GOTERM_BP_FAT	GO:0007051~spindle organization	12	1.45985	0.00553939	9611, 11065, 9126, 4292, 7283, 203068, 10403, 701, 8841, 26271, 55142, 6790	770	24	3656	2.37403	1	0.0761692	9.63432
GOTERM_BP_FAT	GO:0050864~regulation of B cell activation	12	1.45985	0.00553939	958, 10673, 8741, 6777, 6776, 572, 6778, 1026, 23495, 604, 836, 939	770	24	3656	2.37403	1	0.0761692	9.63432
GOTERM_BP_FAT	GO:0052547~regulation of peptidase activity	18	2.18978	0.00554612	842, 2149, 6772, 581, 2935, 332, 857, 3309, 6188, 7157, 5366, 27113, 8795, 4088, 572, 578, 3932, 4609	770	44	3656	1.94238	1	0.0759492	9.64549
GOTERM_BP_FAT	GO:0008630~DNA damage response, signal transduction resulting in induction of apoptosis	9	1.09489	0.00577631	8930, 11200, 28996, 27113, 4292, 2956, 25, 7157, 602	770	15	3656	2.84883	1	0.0786638	10.0261
GOTERM_BP_FAT	GO:0000186~activation of MAPKK activity	9	1.09489	0.00577631	4616, 2771, 2149, 10912, 1956, 4216, 5663, 7046, 3717	770	15	3656	2.84883	1	0.0786638	10.0261
GOTERM_BP_FAT	GO:0045667~regulation of osteoblast differentiation	11	1.3382	0.00581884	659, 10140, 8313, 4088, 4090, 90, 2101, 6497, 4086, 3727, 1499	770	21	3656	2.48707	1	0.0789031	10.0963
GOTERM_BP_FAT	GO:0051225~spindle assembly	6	0.729927	0.00584038	9611, 4292, 203068, 8841, 26271, 55142	770	7	3656	4.06976	1	0.0788676	10.1318
GOTERM_BP_FAT	GO:0045646~regulation of erythrocyte differentiation	6	0.729927	0.00584038	1432, 2309, 3091, 6777, 2113, 6776	770	7	3656	4.06976	1	0.0788676	10.1318
GOTERM_BP_FAT	GO:0043330~response to exogenous dsRNA	6	0.729927	0.00584038	3661, 7098, 6772, 8767, 4792, 5594	770	7	3656	4.06976	1	0.0788676	10.1318
GOTERM_BP_FAT	GO:0010745~negative regulation of foam cell differentiation	6	0.729927	0.00584038	5465, 19, 7376, 5468, 4792, 10062	770	7	3656	4.06976	1	0.0788676	10.1318
GOTERM_BP_FAT	GO:0040029~regulation of gene expression, epigenetic	17	2.06813	0.00629961	27044, 6597, 3159, 1786, 53615, 1788, 1789, 10014, 55929, 5987, 546, 4088, 3066, 2353, 4086, 23411, 4087	770	41	3656	1.9687	1	0.0844806	10.8859
GOTERM_BP_FAT	GO:0048534~hemopoietic or lymphoid organ development	37	4.50122	0.00665911	6146, 841, 1147, 5971, 5087, 23054, 5663, 641, 1499, 10014, 7189, 8792, 4090, 7048, 7046, 578, 10018, 604, 602, 3205, 3059, 581, 4436, 9759, 3398, 5925, 5468, 7157, 3717, 1880, 6223, 6777, 6776, 4791, 5591, 3932, 998	770	116	3656	1.51446	1	0.0887444	11.4721
GOTERM_BP_FAT	GO:0001775~cell activation	40	4.86618	0.00682724	6146, 5971, 2149, 1956, 8767, 3476, 10672, 5663, 7454, 641, 1499, 10014, 7189, 8440, 2956, 7048, 578, 604, 5580, 602, 958, 4292, 581, 7409, 4436, 9759, 7157, 1880, 5359, 7098, 4088, 7534, 6777, 6776, 2534, 4791, 5591, 3932, 9156, 4690	770	128	3656	1.48377	1	0.0905308	11.7449
GOTERM_BP_FAT	GO:0043543~protein amino acid acylation	13	1.58151	0.00735103	10524, 2033, 10856, 8607, 64769, 53615, 2648, 10933, 55929, 1387, 11143, 8295, 86	770	28	3656	2.20445	1	0.0967742	12.59
GOTERM_BP_FAT	GO:0033157~regulation of intracellular protein transport	13	1.58151	0.00735103	580, 4188, 2932, 939, 3717, 1020, 3172, 4601, 4088, 7046, 4792, 23411, 602	770	28	3656	2.20445	1	0.0967742	12.59
GOTERM_BP_FAT	GO:0000226~microtubule cytoskeleton organization	24	2.91971	0.00762919	1410, 9611, 5747, 11065, 4292, 7283, 4869, 10403, 857, 8841, 5531, 26271, 1499, 6790, 81565, 5979, 5590, 9126, 1647, 29911, 4751, 203068, 701, 55142	770	67	3656	1.70079	1	0.0998714	13.0356
GOTERM_BP_FAT	GO:0043623~cellular protein complex assembly	24	2.91971	0.00762919	811, 5747, 1434, 7514, 4292, 7283, 23542, 857, 26271, 7454, 1855, 10471, 1020, 3320, 7277, 51194, 4088, 203068, 8440, 2185, 5879, 4086, 4087, 4690	770	67	3656	1.70079	1	0.0998714	13.0356
GOTERM_BP_FAT	GO:0035295~tube development	24	2.91971	0.00762919	659, 6722, 841, 9618, 1856, 5087, 2033, 4851, 5629, 7249, 90, 5663, 10672, 6885, 960, 1499, 7189, 1523, 5979, 5499, 7048, 10018, 7046, 4087	770	67	3656	1.70079	1	0.0998714	13.0356
GOTERM_BP_FAT	GO:0045927~positive regulation of growth	12	1.45985	0.00804912	6198, 2033, 5629, 6777, 6776, 8877, 2185, 7048, 1385, 7046, 207, 4654	770	25	3656	2.27906	1	0.104686	13.7043
GOTERM_BP_FAT	GO:0010887~negative regulation of cholesterol storage	5	0.608273	0.00809679	5465, 19, 7376, 5468, 10062	770	5	3656	4.74805	1	0.104872	13.7799
GOTERM_BP_FAT	GO:0045885~positive regulation of survival gene product expression	5	0.608273	0.00809679	4208, 10673, 6777, 6776, 7046	770	5	3656	4.74805	1	0.104872	13.7799
GOTERM_BP_FAT	GO:0001783~B cell apoptosis	5	0.608273	0.00809679	10758, 581, 578, 10018, 4609	770	5	3656	4.74805	1	0.104872	13.7799
GOTERM_BP_FAT	GO:0045923~positive regulation of fatty acid metabolic process	7	0.851582	0.00817615	5465, 51085, 3172, 3667, 7376, 5468, 10062	770	10	3656	3.32364	1	0.105444	13.9056
GOTERM_BP_FAT	GO:0035239~tube morphogenesis	17	2.06813	0.00824001	6722, 841, 1856, 5087, 4851, 90, 7249, 5663, 10672, 6885, 960, 1499, 7189, 5979, 5499, 7048, 10018	770	42	3656	1.92183	1	0.105822	14.0066
GOTERM_BP_FAT	GO:0030163~protein catabolic process	78	9.48905	0.00863009	8881, 81631, 841, 8535, 10401, 5682, 331, 5685, 5683, 983, 9491, 10393, 64682, 25793, 10197, 6612, 8878, 701, 5886, 51465, 7251, 580, 5708, 79754, 5691, 5693, 5700, 5701, 207, 51366, 7347, 5688, 64326, 8454, 8312, 8452, 7341, 7128, 51434, 29882, 4790, 4085, 5717, 8554, 64750, 4738, 5970, 10273, 5663, 867, 9361, 6500, 7189, 6687, 7041, 6045, 51343, 7334, 23192, 54476, 1540, 9978, 26994, 84708, 787…	770	287	3656	1.29041	1	0.110148	14.6214
GOTERM_BP_FAT	GO:0043410~positive regulation of MAPKKK cascade	11	1.3382	0.00869469	28996, 7098, 10174, 2149, 8312, 51347, 8767, 23542, 6885, 1499, 939	770	22	3656	2.37403	1	0.110512	14.7228
GOTERM_BP_FAT	GO:0051249~regulation of lymphocyte activation	23	2.79805	0.00881363	958, 10673, 8741, 8767, 6885, 23495, 1026, 8764, 836, 939, 641, 7189, 26258, 8440, 6777, 6776, 572, 7048, 6778, 83737, 3932, 604, 4690	770	64	3656	1.70633	1	0.111523	14.9092
GOTERM_BP_FAT	GO:0045321~leukocyte activation	35	4.25791	0.00881437	6146, 5971, 8767, 3476, 5663, 7454, 1499, 641, 10014, 7189, 8440, 2956, 7048, 578, 604, 5580, 602, 958, 4292, 581, 7409, 4436, 9759, 7157, 1880, 7098, 4088, 7534, 6777, 6776, 2534, 5591, 3932, 4690, 9156	770	110	3656	1.51074	1	0.111117	14.9104
GOTERM_BP_FAT	GO:0048610~reproductive cellular process	20	2.43309	0.00883869	595, 7536, 9319, 599, 598, 2309, 581, 90, 4436, 26271, 207, 6198, 994, 8312, 4090, 2185, 891, 5591, 7046, 23139	770	53	3656	1.79172	1	0.110994	14.9485
GOTERM_BP_FAT	GO:0007548~sex differentiation	20	2.43309	0.00883869	595, 7536, 599, 3148, 598, 5087, 2309, 581, 4436, 8204, 4090, 6777, 894, 2175, 6776, 10018, 898, 23411, 6662, 6934	770	53	3656	1.79172	1	0.110994	14.9485
GOTERM_BP_FAT	GO:0051336~regulation of hydrolase activity	38	4.62287	0.00899864	842, 2149, 6772, 1956, 2935, 7249, 332, 10672, 6188, 81565, 27113, 8795, 11345, 2956, 572, 7376, 578, 10062, 604, 7486, 2081, 9779, 581, 7409, 4436, 10928, 28964, 857, 3309, 7157, 5366, 3717, 5590, 4088, 2185, 3932, 23411, 4609	770	122	3656	1.4789	1	0.112476	15.1984
GOTERM_BP_FAT	GO:0007179~transforming growth factor beta receptor signaling pathway	14	1.70316	0.00909209	3725, 5796, 90, 8200, 6885, 1385, 409, 4088, 4090, 7048, 2353, 7046, 4086, 4087	770	32	3656	2.07727	1	0.113163	15.3441
GOTERM_BP_FAT	GO:0031570~DNA integrity checkpoint	14	1.70316	0.00909209	595, 11200, 890, 1432, 5883, 4436, 1111, 51499, 3014, 7157, 641, 983, 990, 9656	770	32	3656	2.07727	1	0.113163	15.3441
GOTERM_BP_FAT	GO:0050871~positive regulation of B cell activation	10	1.21655	0.00920714	958, 10673, 8741, 6777, 6776, 572, 6778, 1026, 604, 939	770	19	3656	2.49897	1	0.114096	15.5232
GOTERM_BP_FAT	GO:0043967~histone H4 acetylation	8	0.973236	0.00922295	10933, 55929, 10856, 8607, 64769, 11143, 8295, 86	770	13	3656	2.92188	1	0.113865	15.5478
GOTERM_BP_FAT	GO:0048742~regulation of skeletal muscle fiber development	8	0.973236	0.00922295	10014, 694, 3486, 93649, 4851, 3065, 9759, 8841	770	13	3656	2.92188	1	0.113865	15.5478
GOTERM_BP_FAT	GO:0048477~oogenesis	8	0.973236	0.00922295	9319, 994, 4292, 8312, 2309, 891, 2185, 26271	770	13	3656	2.92188	1	0.113865	15.5478
GOTERM_BP_FAT	GO:0006333~chromatin assembly or disassembly	18	2.18978	0.00925738	10524, 6599, 3148, 5926, 4869, 1108, 8535, 6839, 10951, 4673, 3159, 3014, 23468, 92815, 6418, 6601, 6605, 11335	770	46	3656	1.85793	1	0.113851	15.6013
GOTERM_BP_FAT	GO:0019221~cytokine-mediated signaling pathway	16	1.94647	0.00940397	6774, 6775, 6772, 5970, 3875, 3716, 1439, 7132, 8737, 6777, 6776, 572, 6778, 3654, 51135, 8717	770	39	3656	1.94792	1	0.115136	15.8288
GOTERM_BP_FAT	GO:0048732~gland development	16	1.94647	0.00940397	3219, 2065, 3205, 5087, 1956, 2908, 857, 4192, 1385, 10370, 3480, 6777, 3667, 6776, 10018, 7046	770	39	3656	1.94792	1	0.115136	15.8288
GOTERM_BP_FAT	GO:0050852~T cell receptor signaling pathway	9	1.09489	0.00945445	7189, 8517, 7334, 8767, 5663, 9564, 2534, 6885, 5594	770	16	3656	2.67078	1	0.115303	15.9069
GOTERM_BP_FAT	GO:0051153~regulation of striated muscle cell differentiation	9	1.09489	0.00945445	10014, 694, 5629, 3486, 93649, 4851, 3065, 9759, 8841	770	16	3656	2.67078	1	0.115303	15.9069
GOTERM_BP_FAT	GO:0051130~positive regulation of cellular component organization	30	3.64964	0.00954305	6722, 10174, 2932, 867, 196, 1027, 6872, 382, 1786, 1789, 7041, 81565, 7334, 8440, 7046, 811, 4869, 5629, 5170, 857, 207, 7341, 7074, 4088, 396, 5879, 998, 4086, 4087, 4690	770	91	3656	1.56529	1	0.115906	16.044
GOTERM_BP_FAT	GO:0070201~regulation of establishment of protein localization	21	2.55474	0.00954728	958, 7529, 580, 4188, 2932, 26060, 5170, 834, 207, 939, 3717, 7189, 1020, 5590, 3172, 4601, 4088, 7046, 4792, 23411, 602	770	57	3656	1.74928	1	0.11554	16.0506
GOTERM_BP_FAT	GO:0000077~DNA damage checkpoint	13	1.58151	0.0101945	595, 11200, 890, 1432, 5883, 4436, 1111, 51499, 3014, 7157, 641, 983, 9656	770	29	3656	2.12844	1	0.122472	17.0454
GOTERM_BP_FAT	GO:0035107~appendage morphogenesis	13	1.58151	0.0101945	3205, 5087, 6597, 4851, 581, 5916, 2768, 5663, 8200, 1499, 6927, 6497, 578	770	29	3656	2.12844	1	0.122472	17.0454
GOTERM_BP_FAT	GO:0035108~limb morphogenesis	13	1.58151	0.0101945	3205, 5087, 6597, 4851, 581, 5916, 2768, 5663, 8200, 1499, 6927, 6497, 578	770	29	3656	2.12844	1	0.122472	17.0454
GOTERM_BP_FAT	GO:0007498~mesoderm development	12	1.45985	0.0113588	659, 6927, 695, 2131, 5573, 5515, 4088, 90, 4086, 3055, 3717, 4087	770	26	3656	2.19141	1	0.135067	18.8071
GOTERM_BP_FAT	GO:0046649~lymphocyte activation	31	3.77129	0.0114061	6146, 5971, 8767, 3476, 5663, 7454, 1499, 641, 10014, 8440, 2956, 578, 604, 5580, 602, 958, 4292, 581, 7409, 4436, 9759, 7157, 1880, 4088, 6777, 2534, 6776, 5591, 3932, 4690, 9156	770	96	3656	1.53323	1	0.13512	18.8779
GOTERM_BP_FAT	GO:0021700~developmental maturation	16	1.94647	0.0121991	1003, 9319, 695, 2309, 4851, 5663, 26271, 960, 5468, 207, 1499, 5979, 994, 8312, 2185, 891	770	40	3656	1.89922	1	0.14336	20.0565
GOTERM_BP_FAT	GO:0030099~myeloid cell differentiation	16	1.94647	0.0121991	841, 5971, 1147, 3059, 23054, 3398, 5663, 5925, 5468, 3717, 7189, 6223, 4090, 7048, 604, 998	770	40	3656	1.89922	1	0.14336	20.0565
GOTERM_BP_FAT	GO:0019217~regulation of fatty acid metabolic process	11	1.3382	0.012545	5465, 51085, 55437, 3172, 3667, 7376, 857, 6794, 5468, 207, 10062	770	23	3656	2.27081	1	0.146627	20.5655
GOTERM_BP_FAT	GO:0051251~positive regulation of lymphocyte activation	19	2.31144	0.0127378	958, 10673, 8741, 8767, 6885, 1026, 939, 641, 7189, 26258, 6777, 8440, 6776, 572, 7048, 6778, 3932, 604, 4690	770	51	3656	1.76888	1	0.148208	20.8479
GOTERM_BP_FAT	GO:0007005~mitochondrion organization	19	2.31144	0.0127378	3725, 840, 598, 51100, 581, 9361, 207, 27429, 7157, 836, 5366, 6687, 27113, 3320, 4088, 50484, 7534, 578, 4609	770	51	3656	1.76888	1	0.148208	20.8479
GOTERM_BP_FAT	GO:0070227~lymphocyte apoptosis	6	0.729927	0.0128907	10758, 581, 578, 10018, 207, 4609	770	8	3656	3.56104	1	0.149345	21.0711
GOTERM_BP_FAT	GO:0007250~activation of NF-kappaB-inducing kinase activity	6	0.729927	0.0128907	7189, 8517, 7098, 8795, 6885, 3654	770	8	3656	3.56104	1	0.149345	21.0711
GOTERM_BP_FAT	GO:0010888~negative regulation of lipid storage	6	0.729927	0.0128907	5465, 19, 7376, 5468, 4792, 10062	770	8	3656	3.56104	1	0.149345	21.0711
GOTERM_BP_FAT	GO:0001556~oocyte maturation	6	0.729927	0.0128907	9319, 994, 2309, 891, 2185, 26271	770	8	3656	3.56104	1	0.149345	21.0711
GOTERM_BP_FAT	GO:0070555~response to interleukin-1	6	0.729927	0.0128907	4615, 5970, 8767, 9759, 3654, 166	770	8	3656	3.56104	1	0.149345	21.0711
GOTERM_BP_FAT	GO:0032504~multicellular organism reproduction	43	5.23114	0.0131483	6721, 9319, 3148, 1956, 4851, 330, 1788, 8204, 5987, 6908, 4090, 7046, 10018, 23139, 604, 9043, 599, 598, 2309, 4292, 581, 1111, 90, 4436, 8607, 1385, 857, 26271, 3014, 207, 10370, 6198, 994, 8312, 6777, 894, 6776, 891, 2185, 5591, 898, 23411, 4086	770	145	3656	1.40804	1	0.151593	21.446
GOTERM_BP_FAT	GO:0048609~reproductive process in a multicellular organism	43	5.23114	0.0131483	6721, 9319, 3148, 1956, 4851, 330, 1788, 8204, 5987, 6908, 4090, 7046, 10018, 23139, 604, 9043, 599, 598, 2309, 4292, 581, 1111, 90, 4436, 8607, 1385, 857, 26271, 3014, 207, 10370, 6198, 994, 8312, 6777, 894, 6776, 891, 2185, 5591, 898, 23411, 4086	770	145	3656	1.40804	1	0.151593	21.446
GOTERM_BP_FAT	GO:0060429~epithelium development	24	2.91971	0.013541	3725, 841, 1856, 1147, 5087, 7026, 6597, 8721, 5629, 7249, 6885, 960, 5468, 768, 836, 1499, 7189, 7430, 7041, 1832, 5979, 10628, 9139, 7251	770	70	3656	1.6279	1	0.15525	22.0141
GOTERM_BP_FAT	GO:0051147~regulation of muscle cell differentiation	10	1.21655	0.0136788	10014, 6722, 694, 5629, 3486, 93649, 4851, 3065, 9759, 8841	770	20	3656	2.37403	1	0.156182	22.2125
GOTERM_BP_FAT	GO:0050851~antigen receptor-mediated signaling pathway	10	1.21655	0.0136788	7189, 8517, 7334, 8767, 5663, 9564, 2534, 6885, 5594, 51324	770	20	3656	2.37403	1	0.156182	22.2125
GOTERM_BP_FAT	GO:0001764~neuron migration	10	1.21655	0.0136788	1020, 81565, 5747, 7026, 581, 7155, 5663, 2534, 7531, 4692	770	20	3656	2.37403	1	0.156182	22.2125
GOTERM_BP_FAT	GO:0045787~positive regulation of cell cycle	13	1.58151	0.0138194	595, 811, 1956, 5629, 332, 3398, 207, 8061, 10370, 6777, 8877, 6776, 894	770	30	3656	2.05749	1	0.157137	22.4146
GOTERM_BP_FAT	GO:0010212~response to ionizing radiation	13	1.58151	0.0138194	595, 11073, 581, 4436, 857, 3014, 25788, 7157, 1789, 641, 2547, 578, 5591	770	30	3656	2.05749	1	0.157137	22.4146
GOTERM_BP_FAT	GO:0031667~response to nutrient levels	25	3.04136	0.0139824	3725, 6772, 5970, 5916, 5663, 8678, 960, 5465, 7391, 2771, 7048, 659, 595, 857, 6256, 5468, 3309, 207, 4982, 7157, 2, 6198, 6720, 898, 23411	770	74	3656	1.60407	1	0.158317	22.648
GOTERM_BP_FAT	GO:0032844~regulation of homeostatic process	15	1.82482	0.0139914	1432, 2149, 2309, 581, 3091, 857, 960, 4982, 6777, 2113, 6776, 578, 3932, 4609, 4092	770	37	3656	1.92489	1	0.157885	22.6609
GOTERM_BP_FAT	GO:0032496~response to lipopolysaccharide	15	1.82482	0.0139914	3725, 3661, 2149, 1432, 6772, 5970, 8767, 7132, 4615, 6198, 6777, 2353, 3654, 4792, 5594	770	37	3656	1.92489	1	0.157885	22.6609
GOTERM_BP_FAT	GO:0010035~response to inorganic substance	26	3.16302	0.0143592	3725, 6721, 1410, 4331, 5599, 6772, 1956, 2033, 5970, 1026, 311, 1499, 60, 5601, 595, 7837, 5796, 598, 6256, 857, 8061, 4982, 2, 10628, 2185, 2353	770	78	3656	1.58268	1	0.161174	23.1853
GOTERM_BP_FAT	GO:0000086~G2/M transition of mitotic cell cycle	9	1.09489	0.0146263	10393, 1647, 332, 1111, 1017, 891, 6872, 1026, 10657	770	17	3656	2.51367	1	0.163394	23.5641
GOTERM_BP_FAT	GO:0018105~peptidyl-serine phosphorylation	9	1.09489	0.0146263	1020, 5590, 2932, 7048, 6872, 5591, 7046, 207, 11184	770	17	3656	2.51367	1	0.163394	23.5641
GOTERM_BP_FAT	GO:0006970~response to osmotic stress	9	1.09489	0.0146263	7098, 6558, 1956, 581, 5170, 2185, 5585, 5879, 7157	770	17	3656	2.51367	1	0.163394	23.5641
GOTERM_BP_FAT	GO:0009952~anterior/posterior pattern formation	18	2.18978	0.0147219	659, 3219, 7528, 3205, 7026, 5087, 2033, 4851, 5663, 2648, 1499, 6045, 28996, 3516, 8313, 5591, 7046, 4087	770	48	3656	1.78052	1	0.163838	23.6992
GOTERM_BP_FAT	GO:0043968~histone H2A acetylation	7	0.851582	0.0148238	10933, 55929, 10856, 8607, 64769, 8295, 86	770	11	3656	3.02149	1	0.164343	23.843
GOTERM_BP_FAT	GO:0045814~negative regulation of gene expression, epigenetic	8	0.973236	0.0151496	10014, 5987, 6597, 3066, 53615, 1788, 23411, 1789	770	14	3656	2.71317	1	0.167116	24.3011
GOTERM_BP_FAT	GO:0016575~histone deacetylation	8	0.973236	0.0151496	10014, 10933, 5245, 3065, 9759, 3066, 8841, 23411	770	14	3656	2.71317	1	0.167116	24.3011
GOTERM_BP_FAT	GO:0070304~positive regulation of stress-activated protein kinase signaling pathway	8	0.973236	0.0151496	28996, 7098, 8312, 51347, 8767, 23542, 6885, 939	770	14	3656	2.71317	1	0.167116	24.3011
GOTERM_BP_FAT	GO:0051240~positive regulation of multicellular organismal process	29	3.52798	0.0151526	6722, 2149, 1956, 8767, 5663, 7189, 4615, 7391, 8877, 8717, 602, 659, 958, 581, 3091, 90, 1385, 857, 6885, 834, 207, 3717, 5590, 7098, 93649, 4088, 6777, 3066, 6776	770	90	3656	1.52993	1	0.166605	24.3052
GOTERM_BP_FAT	GO:0042113~B cell activation	16	1.94647	0.0156027	958, 4292, 581, 4436, 9759, 3476, 7157, 10014, 1880, 2956, 5591, 578, 604, 5580, 602, 9156	770	41	3656	1.8529	1	0.170591	24.9337
GOTERM_BP_FAT	GO:0045471~response to ethanol	12	1.45985	0.0156139	595, 6198, 6774, 329, 2033, 6777, 894, 2534, 2185, 898, 7132, 939	770	27	3656	2.11025	1	0.170157	24.9493
GOTERM_BP_FAT	GO:0051603~proteolysis involved in cellular protein catabolic process	75	9.12409	0.0157347	8881, 81631, 841, 8535, 10401, 5682, 331, 5685, 5683, 983, 9491, 10393, 64682, 25793, 10197, 6612, 8878, 701, 5886, 51465, 7251, 580, 5708, 79754, 5691, 5693, 5700, 5701, 51366, 7347, 5688, 64326, 8454, 8452, 7341, 7128, 51434, 29882, 4790, 4085, 5717, 8554, 64750, 4738, 5970, 10273, 5663, 867, 9361, 6500, 7189, 7041, 6045, 51343, 7334, 23192, 54476, 1540, 9978, 26994, 84708, 7874, 80028, 57646, …	770	281	3656	1.26727	1	0.170815	25.117
GOTERM_BP_FAT	GO:0044257~cellular protein catabolic process	75	9.12409	0.0157347	8881, 81631, 841, 8535, 10401, 5682, 331, 5685, 5683, 983, 9491, 10393, 64682, 25793, 10197, 6612, 8878, 701, 5886, 51465, 7251, 580, 5708, 79754, 5691, 5693, 5700, 5701, 51366, 7347, 5688, 64326, 8454, 8452, 7341, 7128, 51434, 29882, 4790, 4085, 5717, 8554, 64750, 4738, 5970, 10273, 5663, 867, 9361, 6500, 7189, 7041, 6045, 51343, 7334, 23192, 54476, 1540, 9978, 26994, 84708, 7874, 80028, 57646, …	770	281	3656	1.26727	1	0.170815	25.117
GOTERM_BP_FAT	GO:0051272~positive regulation of cell motion	19	2.31144	0.0157677	2149, 1956, 3091, 9564, 3717, 3480, 6198, 5337, 6223, 4088, 6777, 3667, 2113, 8877, 2185, 7046, 604, 9043, 5594	770	52	3656	1.73487	1	0.1706	25.1628
GOTERM_BP_FAT	GO:0043632~modification-dependent macromolecule catabolic process	71	8.63747	0.0158964	8881, 81631, 8535, 10401, 5682, 331, 5685, 5683, 983, 9491, 10393, 64682, 25793, 10197, 6612, 8878, 701, 5886, 51465, 7251, 580, 5708, 79754, 5691, 5693, 5700, 5701, 51366, 7347, 5688, 64326, 8454, 8452, 7341, 7128, 51434, 29882, 4085, 5717, 8554, 64750, 4738, 10273, 867, 9361, 6500, 7189, 7041, 6045, 51343, 7334, 23192, 54476, 1540, 9978, 26994, 84708, 7874, 80028, 57646, 11065, 112950, 8507, 51…	770	264	3656	1.27694	1	0.17133	25.341
GOTERM_BP_FAT	GO:0019941~modification-dependent protein catabolic process	71	8.63747	0.0158964	8881, 81631, 8535, 10401, 5682, 331, 5685, 5683, 983, 9491, 10393, 64682, 25793, 10197, 6612, 8878, 701, 5886, 51465, 7251, 580, 5708, 79754, 5691, 5693, 5700, 5701, 51366, 7347, 5688, 64326, 8454, 8452, 7341, 7128, 51434, 29882, 4085, 5717, 8554, 64750, 4738, 10273, 867, 9361, 6500, 7189, 7041, 6045, 51343, 7334, 23192, 54476, 1540, 9978, 26994, 84708, 7874, 80028, 57646, 11065, 112950, 8507, 51…	770	264	3656	1.27694	1	0.17133	25.341
GOTERM_BP_FAT	GO:0006338~chromatin remodeling	14	1.70316	0.0160325	6599, 6598, 6597, 9759, 5925, 2648, 10014, 6927, 3065, 3066, 6601, 86, 23411, 11335	770	34	3656	1.95508	1	0.172129	25.5292
GOTERM_BP_FAT	GO:0002521~leukocyte differentiation	24	2.91971	0.0161726	6146, 841, 5971, 1147, 581, 4436, 9759, 5663, 5468, 7157, 1499, 641, 7189, 10014, 1880, 6777, 6776, 7048, 5591, 578, 3932, 604, 998, 602	770	71	3656	1.60498	1	0.172961	25.7224
GOTERM_BP_FAT	GO:0010564~regulation of cell cycle process	20	2.43309	0.0166802	811, 8881, 5300, 11065, 7514, 6597, 4869, 5629, 332, 10419, 5925, 51499, 26271, 10393, 51343, 9587, 4751, 604, 4085, 998	770	56	3656	1.69573	1	0.177361	26.4181
GOTERM_BP_FAT	GO:0045137~development of primary sexual characteristics	17	2.06813	0.0170228	595, 7536, 599, 3148, 598, 2309, 581, 4436, 8204, 6777, 894, 2175, 6776, 10018, 898, 23411, 6662	770	45	3656	1.79371	1	0.18012	26.8842
GOTERM_BP_FAT	GO:0008406~gonad development	17	2.06813	0.0170228	595, 7536, 599, 3148, 598, 2309, 581, 4436, 8204, 6777, 894, 2175, 6776, 10018, 898, 23411, 6662	770	45	3656	1.79371	1	0.18012	26.8842
GOTERM_BP_FAT	GO:0007259~JAK-STAT cascade	11	1.3382	0.017549	8554, 1020, 6774, 2149, 6775, 6772, 9111, 6777, 6776, 2185, 3717	770	24	3656	2.17619	1	0.184612	27.5949
GOTERM_BP_FAT	GO:0002768~immune response-regulating cell surface receptor signaling pathway	11	1.3382	0.017549	7189, 958, 8517, 7334, 8767, 5663, 9564, 2534, 6885, 5594, 51324	770	24	3656	2.17619	1	0.184612	27.5949
GOTERM_BP_FAT	GO:0045767~regulation of anti-apoptosis	11	1.3382	0.017549	57142, 598, 8737, 581, 23542, 2185, 857, 1026, 4086, 23411, 4092	770	24	3656	2.17619	1	0.184612	27.5949
GOTERM_BP_FAT	GO:0007093~mitotic cell cycle checkpoint	11	1.3382	0.017549	595, 8379, 890, 9184, 9587, 701, 51499, 8295, 4085, 7157, 983	770	24	3656	2.17619	1	0.184612	27.5949
GOTERM_BP_FAT	GO:0030097~hemopoiesis	33	4.0146	0.0179137	6146, 841, 1147, 5971, 5087, 23054, 5663, 1499, 641, 10014, 7189, 4090, 7048, 578, 604, 602, 3205, 3059, 581, 4436, 9759, 3398, 5925, 5468, 7157, 3717, 1880, 6223, 6777, 6776, 5591, 3932, 998	770	107	3656	1.46435	1	0.187516	28.0834
GOTERM_BP_FAT	GO:0006275~regulation of DNA replication	13	1.58151	0.0183482	811, 3725, 3265, 6464, 5883, 1017, 7157, 641, 6282, 3480, 5515, 5518, 990	770	31	3656	1.99112	1	0.19105	28.6614
GOTERM_BP_FAT	GO:0009612~response to mechanical stimulus	13	1.58151	0.0183482	3725, 6558, 6772, 5970, 857, 8061, 10628, 6198, 2534, 2185, 7048, 2353, 4609	770	31	3656	1.99112	1	0.19105	28.6614
GOTERM_BP_FAT	GO:0002694~regulation of leukocyte activation	23	2.79805	0.0187153	958, 10673, 8741, 8767, 6885, 23495, 1026, 8764, 836, 939, 641, 7189, 26258, 8440, 6777, 6776, 572, 7048, 6778, 83737, 3932, 604, 4690	770	68	3656	1.60596	1	0.193917	29.1464
GOTERM_BP_FAT	GO:0009057~macromolecule catabolic process	92	11.1922	0.0190522	8881, 81631, 841, 8535, 10401, 5682, 331, 5685, 5683, 983, 8930, 9491, 10393, 64682, 25793, 10197, 6612, 8878, 701, 5886, 51465, 7251, 580, 5708, 79754, 4292, 581, 5691, 5693, 5700, 5701, 207, 51366, 836, 5688, 7347, 64326, 8454, 8312, 8452, 7341, 7128, 51434, 29882, 4790, 4085, 4609, 5717, 8554, 64750, 4331, 4738, 5970, 2935, 10273, 2071, 5663, 867, 9361, 6500, 7189, 6687, 5511, 7041, 6045, 5134…	770	357	3656	1.22359	1	0.196473	29.5888
GOTERM_BP_FAT	GO:0050865~regulation of cell activation	24	2.91971	0.0191924	958, 10673, 8741, 8767, 6885, 23495, 1026, 8764, 836, 3717, 939, 641, 7189, 26258, 8440, 6777, 6776, 572, 7048, 6778, 83737, 3932, 604, 4690	770	72	3656	1.58268	1	0.197182	29.7721
GOTERM_BP_FAT	GO:0046546~development of primary male sexual characteristics	10	1.21655	0.0195737	595, 7536, 599, 3148, 598, 581, 4436, 2175, 10018, 6662	770	21	3656	2.26098	1	0.200112	30.2684
GOTERM_BP_FAT	GO:0042306~regulation of protein import into nucleus	10	1.21655	0.0195737	3172, 4188, 4601, 4088, 7046, 4792, 23411, 939, 3717, 602	770	21	3656	2.26098	1	0.200112	30.2684
GOTERM_BP_FAT	GO:0008584~male gonad development	10	1.21655	0.0195737	595, 7536, 599, 3148, 598, 581, 4436, 2175, 10018, 6662	770	21	3656	2.26098	1	0.200112	30.2684
GOTERM_BP_FAT	GO:0009611~response to wounding	53	6.44769	0.0196117	6722, 6774, 59307, 2149, 4851, 8767, 7249, 7454, 4615, 1051, 5327, 30008, 2065, 5606, 581, 3091, 6256, 4192, 7133, 207, 836, 7132, 3717, 26258, 2, 5359, 6198, 9111, 4088, 6777, 4790, 5879, 4086, 5970, 2768, 10672, 960, 5465, 10014, 3172, 7048, 958, 90, 9759, 1020, 1832, 7098, 57088, 7534, 891, 2353, 83737, 3665	770	190	3656	1.32446	1	0.199863	30.3176
GOTERM_BP_FAT	GO:0007276~gamete generation	36	4.37956	0.0201906	6721, 9319, 3148, 4851, 330, 1788, 8204, 5987, 6908, 4090, 10018, 7046, 23139, 604, 9043, 599, 598, 2309, 4292, 581, 1111, 90, 4436, 8607, 26271, 3014, 207, 994, 6198, 8312, 894, 891, 2185, 5591, 23411, 4086	770	120	3656	1.42442	1	0.204558	31.0643
GOTERM_BP_FAT	GO:0050767~regulation of neurogenesis	20	2.43309	0.0202466	811, 5747, 57142, 5087, 4851, 5970, 55755, 5663, 5468, 7157, 1789, 81565, 60436, 5978, 7074, 396, 894, 7532, 2547, 4086	770	57	3656	1.66598	1	0.204461	31.1361
GOTERM_BP_FAT	GO:0032330~regulation of chondrocyte differentiation	5	0.608273	0.0202531	5970, 7068, 8200, 6662, 1499	770	6	3656	3.95671	1	0.203917	31.1443
GOTERM_BP_FAT	GO:0045910~negative regulation of DNA recombination	5	0.608273	0.0202531	4292, 4436, 2956, 604, 641	770	6	3656	3.95671	1	0.203917	31.1443
GOTERM_BP_FAT	GO:0006972~hyperosmotic response	5	0.608273	0.0202531	7098, 6558, 5170, 5585, 5879	770	6	3656	3.95671	1	0.203917	31.1443
GOTERM_BP_FAT	GO:0048584~positive regulation of response to stimulus	31	3.77129	0.0205613	8517, 5970, 10673, 8767, 5663, 8678, 7189, 81565, 4615, 28996, 7334, 51347, 3654, 51324, 23542, 9564, 6885, 3014, 3717, 939, 7132, 7098, 8312, 4088, 6777, 3667, 2534, 6776, 4792, 3665, 5594	770	100	3656	1.4719	1	0.206098	31.5384
GOTERM_BP_FAT	GO:0070663~regulation of leukocyte proliferation	14	1.70316	0.0207368	958, 10673, 8767, 23495, 1026, 8764, 836, 641, 6777, 8440, 6776, 83737, 604, 4690	770	35	3656	1.89922	1	0.207069	31.7617
GOTERM_BP_FAT	GO:0032944~regulation of mononuclear cell proliferation	14	1.70316	0.0207368	958, 10673, 8767, 23495, 1026, 8764, 836, 641, 6777, 8440, 6776, 83737, 604, 4690	770	35	3656	1.89922	1	0.207069	31.7617
GOTERM_BP_FAT	GO:0050670~regulation of lymphocyte proliferation	14	1.70316	0.0207368	958, 10673, 8767, 23495, 1026, 8764, 836, 641, 6777, 8440, 6776, 83737, 604, 4690	770	35	3656	1.89922	1	0.207069	31.7617
GOTERM_BP_FAT	GO:0045768~positive regulation of anti-apoptosis	9	1.09489	0.0215798	598, 8737, 23542, 2185, 857, 1026, 4086, 23411, 4092	770	18	3656	2.37403	1	0.213973	32.8252
GOTERM_BP_FAT	GO:0007173~epidermal growth factor receptor signaling pathway	9	1.09489	0.0215798	55914, 9252, 1956, 6464, 8440, 9564, 867, 2185, 819	770	18	3656	2.37403	1	0.213973	32.8252
GOTERM_BP_FAT	GO:0021915~neural tube development	9	1.09489	0.0215798	7189, 841, 1856, 5629, 7249, 5663, 6885, 1855, 6934	770	18	3656	2.37403	1	0.213973	32.8252
GOTERM_BP_FAT	GO:0046890~regulation of lipid biosynthetic process	9	1.09489	0.0215798	51085, 7536, 3172, 5629, 2908, 7376, 4790, 207, 10062	770	18	3656	2.37403	1	0.213973	32.8252
GOTERM_BP_FAT	GO:0051223~regulation of protein transport	18	2.18978	0.0224211	958, 7529, 580, 4188, 2932, 834, 939, 3717, 7189, 1020, 5590, 3172, 4601, 4088, 7046, 4792, 23411, 602	770	50	3656	1.7093	1	0.220762	33.8708
GOTERM_BP_FAT	GO:0001817~regulation of cytokine production	24	2.91971	0.0226357	958, 10524, 59307, 2149, 5606, 5970, 8767, 3091, 1385, 6885, 5468, 834, 3717, 7189, 4615, 1051, 7098, 4088, 6777, 6776, 4790, 23139, 604, 602	770	73	3656	1.561	1	0.222003	34.135
GOTERM_BP_FAT	GO:0043393~regulation of protein binding	8	0.973236	0.0233513	10014, 581, 9759, 5663, 5092, 578, 166, 5580	770	15	3656	2.53229	1	0.227577	35.009
GOTERM_BP_FAT	GO:0016331~morphogenesis of embryonic epithelium	8	0.973236	0.0233513	7189, 7041, 5979, 841, 1856, 7249, 6885, 1499	770	15	3656	2.53229	1	0.227577	35.009
GOTERM_BP_FAT	GO:0002684~positive regulation of immune system process	32	3.89294	0.0235007	8517, 5970, 10673, 8741, 8767, 5663, 1026, 641, 7189, 4615, 7334, 8440, 572, 7048, 3654, 604, 51324, 958, 9564, 6885, 939, 26258, 7098, 6777, 6776, 2534, 83737, 6778, 4792, 3932, 5594, 4690	770	105	3656	1.44703	1	0.228218	35.1901
GOTERM_BP_FAT	GO:0030326~embryonic limb morphogenesis	11	1.3382	0.0238823	6927, 3205, 5087, 6597, 5916, 4851, 2768, 5663, 8200, 6497, 1499	770	25	3656	2.08914	1	0.230845	35.6505
GOTERM_BP_FAT	GO:0035113~embryonic appendage morphogenesis	11	1.3382	0.0238823	6927, 3205, 5087, 6597, 5916, 4851, 2768, 5663, 8200, 6497, 1499	770	25	3656	2.08914	1	0.230845	35.6505
GOTERM_BP_FAT	GO:0043029~T cell homeostasis	6	0.729927	0.0240383	581, 6777, 6776, 10018, 207, 836	770	9	3656	3.16537	1	0.231525	35.8377
GOTERM_BP_FAT	GO:0001756~somitogenesis	6	0.729927	0.0240383	3516, 2033, 8313, 5663, 5591, 2648	770	9	3656	3.16537	1	0.231525	35.8377
GOTERM_BP_FAT	GO:0033993~response to lipid	6	0.729927	0.0240383	6721, 1956, 7048, 5468, 7046, 4087	770	9	3656	3.16537	1	0.231525	35.8377
GOTERM_BP_FAT	GO:0050867~positive regulation of cell activation	20	2.43309	0.0243729	958, 10673, 8741, 8767, 6885, 1026, 3717, 939, 641, 7189, 26258, 6777, 8440, 6776, 572, 7048, 6778, 3932, 604, 4690	770	58	3656	1.63726	1	0.233716	36.2377
GOTERM_BP_FAT	GO:0003002~regionalization	20	2.43309	0.0243729	659, 3219, 7528, 1856, 3205, 7026, 5087, 4188, 2033, 4851, 5663, 1499, 2648, 6045, 28996, 3516, 8313, 5591, 7046, 4087	770	58	3656	1.63726	1	0.233716	36.2377
GOTERM_BP_FAT	GO:0006342~chromatin silencing	7	0.851582	0.02446	10014, 6597, 3066, 53615, 1788, 23411, 1789	770	12	3656	2.7697	1	0.233801	36.3414
GOTERM_BP_FAT	GO:0035148~tube lumen formation	7	0.851582	0.02446	7189, 5979, 841, 1856, 7249, 6885, 10018	770	12	3656	2.7697	1	0.233801	36.3414
GOTERM_BP_FAT	GO:0032387~negative regulation of intracellular transport	7	0.851582	0.02446	1020, 1410, 3172, 580, 4188, 4601, 4792	770	12	3656	2.7697	1	0.233801	36.3414
GOTERM_BP_FAT	GO:0046330~positive regulation of JNK cascade	7	0.851582	0.02446	28996, 7098, 8312, 51347, 8767, 6885, 939	770	12	3656	2.7697	1	0.233801	36.3414
GOTERM_BP_FAT	GO:0051321~meiotic cell cycle	14	1.70316	0.0264008	9319, 4292, 7283, 1111, 26271, 3014, 25788, 994, 9126, 4751, 5347, 2956, 2175, 9156	770	36	3656	1.84646	1	0.249348	38.612
GOTERM_BP_FAT	GO:0045834~positive regulation of lipid metabolic process	10	1.21655	0.0271054	5465, 51085, 3172, 3667, 7376, 5468, 207, 10062, 5879, 998	770	22	3656	2.15821	1	0.254454	39.4172
GOTERM_BP_FAT	GO:0030879~mammary gland development	10	1.21655	0.0271054	3480, 3219, 2065, 3205, 6777, 3667, 6776, 857, 1385, 10018	770	22	3656	2.15821	1	0.254454	39.4172
GOTERM_BP_FAT	GO:0002429~immune response-activating cell surface receptor signaling pathway	10	1.21655	0.0271054	7189, 8517, 7334, 8767, 5663, 9564, 2534, 6885, 5594, 51324	770	22	3656	2.15821	1	0.254454	39.4172
GOTERM_BP_FAT	GO:0007292~female gamete generation	10	1.21655	0.0271054	9319, 994, 4292, 8312, 2309, 891, 2185, 26271, 23411, 8204	770	22	3656	2.15821	1	0.254454	39.4172
GOTERM_BP_FAT	GO:0043414~biopolymer methylation	12	1.45985	0.0275398	10498, 694, 55929, 546, 6839, 2935, 10419, 2353, 1786, 96764, 1788, 1789	770	29	3656	1.96471	1	0.257302	39.9086
GOTERM_BP_FAT	GO:0032259~methylation	12	1.45985	0.0275398	10498, 694, 55929, 546, 6839, 2935, 10419, 2353, 1786, 96764, 1788, 1789	770	29	3656	1.96471	1	0.257302	39.9086
GOTERM_BP_FAT	GO:0002696~positive regulation of leukocyte activation	19	2.31144	0.0282811	958, 10673, 8741, 8767, 6885, 1026, 939, 641, 7189, 26258, 6777, 8440, 6776, 572, 7048, 6778, 3932, 604, 4690	770	55	3656	1.64024	1	0.2626	40.7386
GOTERM_BP_FAT	GO:0007568~aging	19	2.31144	0.0282811	7486, 3725, 6721, 811, 6722, 1410, 3265, 4869, 5970, 4436, 6256, 7157, 6198, 2956, 2353, 7046, 4335, 23411, 5580	770	55	3656	1.64024	1	0.2626	40.7386
GOTERM_BP_FAT	GO:0002253~activation of immune response	15	1.82482	0.0285002	8517, 5970, 8767, 9564, 5663, 6885, 7189, 4615, 7098, 7334, 2534, 3654, 4792, 51324, 5594	770	40	3656	1.78052	1	0.263653	40.9818
GOTERM_BP_FAT	GO:0045664~regulation of neuron differentiation	16	1.94647	0.0302456	811, 5747, 57142, 5087, 4851, 55755, 5663, 1789, 60436, 5978, 81565, 7074, 396, 894, 7532, 4086	770	44	3656	1.72656	1	0.2768	42.8859
GOTERM_BP_FAT	GO:0044265~cellular macromolecule catabolic process	88	10.7056	0.0302763	8881, 81631, 841, 8535, 10401, 5682, 331, 5685, 5683, 983, 8930, 9491, 10393, 64682, 25793, 10197, 6612, 8878, 701, 5886, 51465, 7251, 580, 5708, 79754, 4292, 581, 5691, 5693, 5700, 5701, 51366, 836, 5688, 7347, 64326, 8454, 8452, 7341, 7128, 51434, 29882, 4790, 4085, 4609, 5717, 8554, 64750, 4331, 4738, 5970, 2935, 10273, 2071, 5663, 867, 9361, 6500, 7189, 5511, 7041, 6045, 51343, 7334, 23192, 5…	770	346	3656	1.2076	1	0.276308	42.9189
GOTERM_BP_FAT	GO:0017015~regulation of transforming growth factor beta receptor signaling pathway	9	1.09489	0.0305781	7041, 10370, 64750, 5300, 28996, 58533, 4088, 6497, 4087	770	19	3656	2.24908	1	0.27794	43.242
GOTERM_BP_FAT	GO:0018209~peptidyl-serine modification	9	1.09489	0.0305781	1020, 5590, 2932, 7048, 6872, 5591, 7046, 207, 11184	770	19	3656	2.24908	1	0.27794	43.242
GOTERM_BP_FAT	GO:0030334~regulation of cell migration	24	2.91971	0.030935	57142, 5796, 2149, 1956, 3091, 9564, 10672, 207, 3717, 10014, 1020, 10370, 3480, 6198, 5337, 3486, 4088, 3667, 8877, 2185, 5879, 4092, 9043, 5594	770	75	3656	1.51938	1	0.279986	43.6219
GOTERM_BP_FAT	GO:0033137~negative regulation of peptidyl-serine phosphorylation	4	0.486618	0.0312731	581, 857, 578, 4092	770	4	3656	4.74805	1	0.281869	43.9795
GOTERM_BP_FAT	GO:0042532~negative regulation of tyrosine phosphorylation of STAT protein	4	0.486618	0.0312731	3172, 5515, 5518, 857	770	4	3656	4.74805	1	0.281869	43.9795
GOTERM_BP_FAT	GO:0070303~negative regulation of stress-activated protein kinase signaling pathway	4	0.486618	0.0312731	9611, 51347, 8841, 207	770	4	3656	4.74805	1	0.281869	43.9795
GOTERM_BP_FAT	GO:0060397~JAK-STAT cascade involved in growth hormone signaling pathway	4	0.486618	0.0312731	6774, 6777, 6776, 3717	770	4	3656	4.74805	1	0.281869	43.9795
GOTERM_BP_FAT	GO:0045668~negative regulation of osteoblast differentiation	4	0.486618	0.0312731	10140, 8313, 4088, 6497	770	4	3656	4.74805	1	0.281869	43.9795
GOTERM_BP_FAT	GO:0032436~positive regulation of proteasomal ubiquitin-dependent protein catabolic process	4	0.486618	0.0312731	10273, 6872, 207, 4092	770	4	3656	4.74805	1	0.281869	43.9795
GOTERM_BP_FAT	GO:0006346~methylation-dependent chromatin silencing	4	0.486618	0.0312731	6597, 53615, 1788, 1789	770	4	3656	4.74805	1	0.281869	43.9795
GOTERM_BP_FAT	GO:0000320~re-entry into mitotic cell cycle	4	0.486618	0.0312731	595, 899, 4194, 2932	770	4	3656	4.74805	1	0.281869	43.9795
GOTERM_BP_FAT	GO:0046329~negative regulation of JNK cascade	4	0.486618	0.0312731	9611, 51347, 8841, 207	770	4	3656	4.74805	1	0.281869	43.9795
GOTERM_BP_FAT	GO:0010832~negative regulation of myotube differentiation	4	0.486618	0.0312731	10014, 3065, 9759, 8841	770	4	3656	4.74805	1	0.281869	43.9795
GOTERM_BP_FAT	GO:0010830~regulation of myotube differentiation	4	0.486618	0.0312731	10014, 3065, 9759, 8841	770	4	3656	4.74805	1	0.281869	43.9795
GOTERM_BP_FAT	GO:0033235~positive regulation of protein sumoylation	4	0.486618	0.0312731	8554, 10401, 9759, 51588	770	4	3656	4.74805	1	0.281869	43.9795
GOTERM_BP_FAT	GO:0050872~white fat cell differentiation	4	0.486618	0.0312731	1488, 1487, 5468, 23411	770	4	3656	4.74805	1	0.281869	43.9795
GOTERM_BP_FAT	GO:0016925~protein sumoylation	4	0.486618	0.0312731	7341, 10401, 6612, 51588	770	4	3656	4.74805	1	0.281869	43.9795
GOTERM_BP_FAT	GO:0033233~regulation of protein sumoylation	4	0.486618	0.0312731	8554, 10401, 9759, 51588	770	4	3656	4.74805	1	0.281869	43.9795
GOTERM_BP_FAT	GO:0051154~negative regulation of striated muscle cell differentiation	4	0.486618	0.0312731	10014, 3065, 9759, 8841	770	4	3656	4.74805	1	0.281869	43.9795
GOTERM_BP_FAT	GO:0045639~positive regulation of myeloid cell differentiation	8	0.973236	0.0341599	3725, 1432, 2309, 3091, 3398, 2113, 6776, 5925	770	16	3656	2.37403	1	0.303081	46.9472
GOTERM_BP_FAT	GO:0006979~response to oxidative stress	22	2.6764	0.0354492	7486, 3725, 7837, 1410, 5796, 598, 1956, 2033, 6772, 5970, 3091, 5663, 2071, 5693, 9361, 8061, 3717, 6927, 10628, 50484, 2185, 2353	770	68	3656	1.53613	1	0.311893	48.224
GOTERM_BP_FAT	GO:0031334~positive regulation of protein complex assembly	10	1.21655	0.0364656	6722, 7341, 2932, 8440, 1027, 857, 382, 6872, 5879, 4690	770	23	3656	2.06437	1	0.318561	49.21
GOTERM_BP_FAT	GO:0050730~regulation of peptidyl-tyrosine phosphorylation	10	1.21655	0.0364656	3172, 5590, 3059, 5515, 1956, 5518, 857, 8764, 5580, 3717	770	23	3656	2.06437	1	0.318561	49.21
GOTERM_BP_FAT	GO:0006470~protein amino acid dephosphorylation	16	1.94647	0.0368571	11266, 5796, 11221, 5536, 5801, 994, 5495, 80824, 5515, 9150, 993, 5518, 5499, 1847, 1845, 1846	770	45	3656	1.6882	1	0.32061	49.5851
GOTERM_BP_FAT	GO:0060070~Wnt receptor signaling pathway through beta-catenin	7	0.851582	0.0375203	595, 8312, 5916, 2932, 1855, 1499, 6934	770	13	3656	2.55664	1	0.3246	50.2145
GOTERM_BP_FAT	GO:0009894~regulation of catabolic process	17	2.06813	0.0381874	580, 5708, 4194, 7514, 5970, 3091, 10273, 9759, 8678, 6872, 3326, 207, 5465, 51085, 3667, 83737, 4092	770	49	3656	1.64728	1	0.328574	50.84
GOTERM_BP_FAT	GO:0032101~regulation of response to external stimulus	18	2.18978	0.039228	2149, 8678, 857, 5468, 7133, 7132, 3717, 5465, 2, 81565, 7391, 8805, 4088, 6777, 6776, 7048, 604, 4654	770	53	3656	1.61255	1	0.335144	51.801
GOTERM_BP_FAT	GO:0032434~regulation of proteasomal ubiquitin-dependent protein catabolic process	5	0.608273	0.03947	10273, 6872, 3326, 207, 4092	770	7	3656	3.39147	1	0.336027	52.0219
GOTERM_BP_FAT	GO:0019233~sensory perception of pain	5	0.608273	0.03947	1020, 2063, 2534, 4692, 5594	770	7	3656	3.39147	1	0.336027	52.0219
GOTERM_BP_FAT	GO:0045598~regulation of fat cell differentiation	5	0.608273	0.03947	11007, 7041, 5468, 207, 23411	770	7	3656	3.39147	1	0.336027	52.0219
GOTERM_BP_FAT	GO:0045931~positive regulation of mitotic cell cycle	5	0.608273	0.03947	5629, 332, 6777, 6776, 8877	770	7	3656	3.39147	1	0.336027	52.0219
GOTERM_BP_FAT	GO:0030514~negative regulation of BMP signaling pathway	5	0.608273	0.03947	10140, 28996, 857, 6497, 4092	770	7	3656	3.39147	1	0.336027	52.0219
GOTERM_BP_FAT	GO:0043409~negative regulation of MAPKKK cascade	5	0.608273	0.03947	9611, 51347, 857, 8841, 207	770	7	3656	3.39147	1	0.336027	52.0219
GOTERM_BP_FAT	GO:0045930~negative regulation of mitotic cell cycle	6	0.729927	0.0399004	3172, 1956, 6597, 4088, 5925, 604	770	10	3656	2.84883	1	0.338221	52.4125
GOTERM_BP_FAT	GO:0002221~pattern recognition receptor signaling pathway	6	0.729927	0.0399004	4615, 7098, 5970, 8767, 3654, 4792	770	10	3656	2.84883	1	0.338221	52.4125
GOTERM_BP_FAT	GO:0006298~mismatch repair	6	0.729927	0.0399004	4292, 4436, 2956, 25, 6996, 9156	770	10	3656	2.84883	1	0.338221	52.4125
GOTERM_BP_FAT	GO:0009617~response to bacterium	20	2.43309	0.0406015	3725, 3661, 1432, 2149, 6772, 5970, 8767, 2268, 7132, 4615, 6198, 7098, 5337, 6777, 2353, 3654, 4792, 5594, 602, 3055	770	61	3656	1.55674	1	0.342275	53.0423
GOTERM_BP_FAT	GO:0043523~regulation of neuron apoptosis	14	1.70316	0.0409927	3725, 842, 3265, 2065, 598, 2149, 581, 2908, 4436, 5663, 7157, 3717, 1020, 28996	770	38	3656	1.74928	1	0.34415	53.3903
GOTERM_BP_FAT	GO:0009896~positive regulation of catabolic process	11	1.3382	0.0411776	5465, 51085, 580, 3091, 3667, 10273, 8678, 83737, 6872, 207, 4092	770	27	3656	1.93439	1	0.344595	53.5539
GOTERM_BP_FAT	GO:0031331~positive regulation of cellular catabolic process	9	1.09489	0.0418444	5465, 51085, 3091, 3667, 10273, 8678, 6872, 207, 4092	770	20	3656	2.13662	1	0.348328	54.1395
GOTERM_BP_FAT	GO:0030111~regulation of Wnt receptor signaling pathway	9	1.09489	0.0418444	595, 6927, 5515, 4188, 8312, 5518, 8313, 7249, 1855	770	20	3656	2.13662	1	0.348328	54.1395
GOTERM_BP_FAT	GO:0002237~response to molecule of bacterial origin	15	1.82482	0.0429352	3725, 3661, 2149, 1432, 6772, 5970, 8767, 7132, 4615, 6198, 6777, 2353, 3654, 4792, 5594	770	42	3656	1.69573	1	0.354881	55.0823
GOTERM_BP_FAT	GO:0019953~sexual reproduction	37	4.50122	0.0444616	6721, 9319, 3148, 6774, 4851, 330, 1788, 8204, 5987, 6908, 4090, 10018, 7046, 23139, 604, 9043, 599, 598, 2309, 4292, 581, 1111, 90, 4436, 8607, 26271, 3014, 207, 6198, 994, 8312, 894, 891, 2185, 5591, 23411, 4086	770	131	3656	1.34105	1	0.36423	56.371
GOTERM_BP_FAT	GO:0051051~negative regulation of transport	17	2.06813	0.0456069	1410, 7529, 2065, 580, 4188, 382, 207, 8682, 2771, 1020, 3172, 4601, 7376, 4790, 4792, 10062, 5879	770	50	3656	1.61434	1	0.370916	57.3149
GOTERM_BP_FAT	GO:0051960~regulation of nervous system development	20	2.43309	0.0474482	811, 5747, 57142, 5087, 4851, 5970, 55755, 5663, 5468, 7157, 1789, 81565, 60436, 5978, 7074, 396, 894, 7532, 2547, 4086	770	62	3656	1.53163	1	0.381987	58.7921
GOTERM_BP_FAT	GO:0002009~morphogenesis of an epithelium	13	1.58151	0.04783	841, 1856, 1147, 5087, 5629, 7249, 6885, 960, 768, 1499, 7189, 7041, 5979	770	35	3656	1.76356	1	0.383559	59.0923
GOTERM_BP_FAT	GO:0007126~meiosis	13	1.58151	0.04783	9319, 4292, 1111, 26271, 3014, 25788, 994, 9126, 4751, 5347, 2956, 2175, 9156	770	35	3656	1.76356	1	0.383559	59.0923
GOTERM_BP_FAT	GO:0051327~M phase of meiotic cell cycle	13	1.58151	0.04783	9319, 4292, 1111, 26271, 3014, 25788, 994, 9126, 4751, 5347, 2956, 2175, 9156	770	35	3656	1.76356	1	0.383559	59.0923
GOTERM_BP_FAT	GO:0043507~positive regulation of JUN kinase activity	8	0.973236	0.0478335	4217, 1616, 4188, 8737, 4294, 2185, 5585, 11184	770	17	3656	2.23438	1	0.382709	59.095
GOTERM_BP_FAT	GO:0006476~protein amino acid deacetylation	8	0.973236	0.0478335	10014, 10933, 5245, 3065, 9759, 3066, 8841, 23411	770	17	3656	2.23438	1	0.382709	59.095
GOTERM_BP_FAT	GO:0002573~myeloid leukocyte differentiation	8	0.973236	0.0478335	7189, 841, 1147, 5971, 5663, 7048, 5468, 998	770	17	3656	2.23438	1	0.382709	59.095
GOTERM_BP_FAT	GO:0007281~germ cell development	14	1.70316	0.0500916	9319, 598, 2309, 581, 4436, 90, 26271, 207, 994, 6198, 8312, 4090, 2185, 891	770	39	3656	1.70443	1	0.396077	60.8285
GOTERM_BP_FAT	GO:0016311~dephosphorylation	17	2.06813	0.0539927	11266, 5796, 11221, 5536, 1033, 5801, 994, 5495, 80824, 993, 5515, 9150, 5518, 5499, 1847, 1845, 1846	770	51	3656	1.58268	1	0.419061	63.6609
GOTERM_BP_FAT	GO:0032392~DNA geometric change	7	0.851582	0.0542983	4175, 3148, 4176, 3146, 7150, 2071, 3159	770	14	3656	2.37403	1	0.419977	63.8743
GOTERM_BP_FAT	GO:0051258~protein polymerization	7	0.851582	0.0542983	7277, 7283, 203068, 857, 7454, 26271, 5879	770	14	3656	2.37403	1	0.419977	63.8743
GOTERM_BP_FAT	GO:0046425~regulation of JAK-STAT cascade	7	0.851582	0.0542983	3172, 3059, 2149, 5515, 5518, 857, 3717	770	14	3656	2.37403	1	0.419977	63.8743
GOTERM_BP_FAT	GO:0032508~DNA duplex unwinding	7	0.851582	0.0542983	4175, 3148, 4176, 3146, 7150, 2071, 3159	770	14	3656	2.37403	1	0.419977	63.8743
GOTERM_BP_FAT	GO:0019218~regulation of steroid metabolic process	7	0.851582	0.0542983	7536, 5629, 2908, 6777, 10273, 6776, 4790	770	14	3656	2.37403	1	0.419977	63.8743
GOTERM_BP_FAT	GO:0007257~activation of JUN kinase activity	7	0.851582	0.0542983	4217, 1616, 4188, 8737, 4294, 5585, 11184	770	14	3656	2.37403	1	0.419977	63.8743
GOTERM_BP_FAT	GO:0051591~response to cAMP	9	1.09489	0.0555494	3725, 133522, 329, 6772, 5970, 894, 2185, 2353, 8061	770	21	3656	2.03488	1	0.426497	64.7361
GOTERM_BP_FAT	GO:0034976~response to endoplasmic reticulum stress	9	1.09489	0.0555494	595, 2081, 468, 2932, 23645, 4780, 3309, 5610, 7157	770	21	3656	2.03488	1	0.426497	64.7361
GOTERM_BP_FAT	GO:0048771~tissue remodeling	9	1.09489	0.0555494	6927, 2065, 2149, 581, 3091, 857, 578, 5879, 1499	770	21	3656	2.03488	1	0.426497	64.7361
GOTERM_BP_FAT	GO:0006730~one-carbon metabolic process	13	1.58151	0.0585446	694, 6839, 2935, 10419, 96764, 1786, 768, 1788, 1789, 10498, 55929, 546, 2353	770	36	3656	1.71457	1	0.443006	66.7209
GOTERM_BP_FAT	GO:0001503~ossification	14	1.70316	0.0604874	2131, 5599, 5764, 1956, 3727, 7189, 8792, 2274, 3486, 8313, 4090, 4088, 7067, 4086	770	40	3656	1.66182	1	0.453107	67.9513
GOTERM_BP_FAT	GO:0002758~innate immune response-activating signal transduction	6	0.729927	0.0607975	4615, 7098, 5970, 8767, 3654, 4792	770	11	3656	2.58985	1	0.453901	68.1437
GOTERM_BP_FAT	GO:0042509~regulation of tyrosine phosphorylation of STAT protein	6	0.729927	0.0607975	3172, 3059, 5515, 5518, 857, 3717	770	11	3656	2.58985	1	0.453901	68.1437
GOTERM_BP_FAT	GO:0006305~DNA alkylation	6	0.729927	0.0607975	55929, 546, 2353, 1786, 1788, 1789	770	11	3656	2.58985	1	0.453901	68.1437
GOTERM_BP_FAT	GO:0007006~mitochondrial membrane organization	6	0.729927	0.0607975	598, 3320, 581, 51100, 578, 7157	770	11	3656	2.58985	1	0.453901	68.1437
GOTERM_BP_FAT	GO:0006268~DNA unwinding during replication	6	0.729927	0.0607975	4175, 3148, 4176, 3146, 7150, 3159	770	11	3656	2.58985	1	0.453901	68.1437
GOTERM_BP_FAT	GO:0006306~DNA methylation	6	0.729927	0.0607975	55929, 546, 2353, 1786, 1788, 1789	770	11	3656	2.58985	1	0.453901	68.1437
GOTERM_BP_FAT	GO:0043525~positive regulation of neuron apoptosis	6	0.729927	0.0607975	3725, 842, 1020, 2908, 581, 7157	770	11	3656	2.58985	1	0.453901	68.1437
GOTERM_BP_FAT	GO:0001838~embryonic epithelial tube formation	6	0.729927	0.0607975	7189, 5979, 841, 1856, 7249, 6885	770	11	3656	2.58985	1	0.453901	68.1437
GOTERM_BP_FAT	GO:0002218~activation of innate immune response	6	0.729927	0.0607975	4615, 7098, 5970, 8767, 3654, 4792	770	11	3656	2.58985	1	0.453901	68.1437
GOTERM_BP_FAT	GO:0031100~organ regeneration	6	0.729927	0.0607975	595, 890, 1026, 5468, 7046, 898	770	11	3656	2.58985	1	0.453901	68.1437
GOTERM_BP_FAT	GO:0032570~response to progesterone stimulus	6	0.729927	0.0607975	10628, 5970, 857, 2353, 898, 8061	770	11	3656	2.58985	1	0.453901	68.1437
GOTERM_BP_FAT	GO:0032663~regulation of interleukin-2 production	6	0.729927	0.0607975	7189, 10524, 6777, 8767, 6776, 6885	770	11	3656	2.58985	1	0.453901	68.1437
GOTERM_BP_FAT	GO:0051054~positive regulation of DNA metabolic process	10	1.21655	0.0612779	3725, 811, 3480, 958, 3265, 7334, 6464, 8741, 6778, 3014	770	25	3656	1.89922	1	0.455642	68.4396
GOTERM_BP_FAT	GO:0008585~female gonad development	10	1.21655	0.0612779	598, 2309, 581, 6777, 894, 2175, 6776, 898, 23411, 8204	770	25	3656	1.89922	1	0.455642	68.4396
GOTERM_BP_FAT	GO:0018212~peptidyl-tyrosine modification	10	1.21655	0.0612779	695, 2065, 2149, 6772, 6776, 2534, 2185, 25, 3716, 3717	770	25	3656	1.89922	1	0.455642	68.4396
GOTERM_BP_FAT	GO:0031099~regeneration	10	1.21655	0.0612779	595, 890, 4851, 891, 6256, 1026, 5468, 7046, 898, 3717	770	25	3656	1.89922	1	0.455642	68.4396
GOTERM_BP_FAT	GO:0018108~peptidyl-tyrosine phosphorylation	10	1.21655	0.0612779	695, 2065, 2149, 6772, 6776, 2534, 2185, 25, 3716, 3717	770	25	3656	1.89922	1	0.455642	68.4396
GOTERM_BP_FAT	GO:0042698~ovulation cycle	10	1.21655	0.0612779	598, 1956, 2309, 581, 6777, 894, 6776, 898, 23411, 8204	770	25	3656	1.89922	1	0.455642	68.4396
GOTERM_BP_FAT	GO:0040012~regulation of locomotion	24	2.91971	0.0614903	57142, 5796, 2149, 1956, 3091, 9564, 10672, 207, 3717, 10014, 1020, 10370, 3480, 6198, 5337, 3486, 4088, 3667, 8877, 2185, 5879, 4092, 9043, 5594	770	80	3656	1.42442	1	0.45588	68.5696
GOTERM_BP_FAT	GO:0060348~bone development	15	1.82482	0.0618755	2131, 5599, 5764, 1956, 3727, 7189, 8792, 2274, 8313, 3486, 4090, 4088, 7067, 4086, 6662	770	44	3656	1.61865	1	0.457074	68.8039
GOTERM_BP_FAT	GO:0006284~base-excision repair	8	0.973236	0.0645403	7486, 8930, 3148, 328, 3146, 6996, 142, 7157	770	18	3656	2.11025	1	0.470687	70.3811
GOTERM_BP_FAT	GO:0006109~regulation of carbohydrate metabolic process	8	0.973236	0.0645403	51085, 11266, 3172, 2908, 3091, 3667, 9759, 207	770	18	3656	2.11025	1	0.470687	70.3811
GOTERM_BP_FAT	GO:0006304~DNA modification	8	0.973236	0.0645403	8930, 55929, 546, 2353, 1786, 6996, 1788, 1789	770	18	3656	2.11025	1	0.470687	70.3811
GOTERM_BP_FAT	GO:0010906~regulation of glucose metabolic process	8	0.973236	0.0645403	51085, 11266, 3172, 2908, 3091, 3667, 9759, 207	770	18	3656	2.11025	1	0.470687	70.3811
GOTERM_BP_FAT	GO:0001704~formation of primary germ layer	8	0.973236	0.0645403	659, 6927, 5573, 4088, 90, 4086, 1499, 4087	770	18	3656	2.11025	1	0.470687	70.3811
GOTERM_BP_FAT	GO:0010675~regulation of cellular carbohydrate metabolic process	8	0.973236	0.0645403	51085, 11266, 3172, 2908, 3091, 3667, 9759, 207	770	18	3656	2.11025	1	0.470687	70.3811
GOTERM_BP_FAT	GO:0048469~cell maturation	11	1.3382	0.0654984	9319, 695, 994, 5979, 8312, 2309, 891, 2185, 5468, 26271, 1499	770	29	3656	1.80099	1	0.474877	70.9295
GOTERM_BP_FAT	GO:0030325~adrenal gland development	4	0.486618	0.0660375	10370, 5087, 2908, 4192	770	5	3656	3.79844	1	0.476793	71.2338
GOTERM_BP_FAT	GO:0045648~positive regulation of erythrocyte differentiation	4	0.486618	0.0660375	1432, 2309, 3091, 2113	770	5	3656	3.79844	1	0.476793	71.2338
GOTERM_BP_FAT	GO:0006265~DNA topological change	4	0.486618	0.0660375	7150, 7155, 2071, 7153	770	5	3656	3.79844	1	0.476793	71.2338
GOTERM_BP_FAT	GO:0045191~regulation of isotype switching	4	0.486618	0.0660375	958, 8741, 6778, 604	770	5	3656	3.79844	1	0.476793	71.2338
GOTERM_BP_FAT	GO:0046902~regulation of mitochondrial membrane permeability	4	0.486618	0.0660375	598, 581, 578, 7157	770	5	3656	3.79844	1	0.476793	71.2338
GOTERM_BP_FAT	GO:0031056~regulation of histone modification	4	0.486618	0.0660375	7334, 6418, 1786, 1789	770	5	3656	3.79844	1	0.476793	71.2338
GOTERM_BP_FAT	GO:0046426~negative regulation of JAK-STAT cascade	4	0.486618	0.0660375	3172, 5515, 5518, 857	770	5	3656	3.79844	1	0.476793	71.2338
GOTERM_BP_FAT	GO:0060395~SMAD protein signal transduction	4	0.486618	0.0660375	3725, 28996, 6497, 2353	770	5	3656	3.79844	1	0.476793	71.2338
GOTERM_BP_FAT	GO:0032350~regulation of hormone metabolic process	4	0.486618	0.0660375	2908, 3091, 10273, 6934	770	5	3656	3.79844	1	0.476793	71.2338
GOTERM_BP_FAT	GO:0051668~localization within membrane	4	0.486618	0.0660375	1956, 581, 51100, 5879	770	5	3656	3.79844	1	0.476793	71.2338
GOTERM_BP_FAT	GO:0030512~negative regulation of transforming growth factor beta receptor signaling pathway	4	0.486618	0.0660375	7041, 5300, 58533, 6497	770	5	3656	3.79844	1	0.476793	71.2338
GOTERM_BP_FAT	GO:0009886~post-embryonic morphogenesis	4	0.486618	0.0660375	581, 8200, 578, 10018	770	5	3656	3.79844	1	0.476793	71.2338
GOTERM_BP_FAT	GO:0043491~protein kinase B signaling cascade	4	0.486618	0.0660375	6198, 7249, 3667, 207	770	5	3656	3.79844	1	0.476793	71.2338
GOTERM_BP_FAT	GO:0045723~positive regulation of fatty acid biosynthetic process	4	0.486618	0.0660375	51085, 3172, 7376, 10062	770	5	3656	3.79844	1	0.476793	71.2338
GOTERM_BP_FAT	GO:0060260~regulation of transcription initiation from RNA polymerase II promoter	4	0.486618	0.0660375	6722, 3146, 196, 6872	770	5	3656	3.79844	1	0.476793	71.2338
GOTERM_BP_FAT	GO:0046889~positive regulation of lipid biosynthetic process	5	0.608273	0.0660492	51085, 3172, 7376, 207, 10062	770	8	3656	2.96753	1	0.475903	71.2404
GOTERM_BP_FAT	GO:0043550~regulation of lipid kinase activity	5	0.608273	0.0660492	5934, 3667, 5925, 5879, 998	770	8	3656	2.96753	1	0.475903	71.2404
GOTERM_BP_FAT	GO:0033135~regulation of peptidyl-serine phosphorylation	5	0.608273	0.0660492	8312, 581, 857, 578, 4092	770	8	3656	2.96753	1	0.475903	71.2404
GOTERM_BP_FAT	GO:0051412~response to corticosterone stimulus	5	0.608273	0.0660492	595, 2353, 1026, 898, 8061	770	8	3656	2.96753	1	0.475903	71.2404
GOTERM_BP_FAT	GO:0051050~positive regulation of transport	22	2.6764	0.0713793	811, 2065, 2149, 581, 2932, 867, 857, 1385, 834, 207, 939, 3717, 1020, 5590, 4088, 3667, 7376, 578, 7046, 4792, 10062, 6934	770	73	3656	1.43092	1	0.502536	74.091
GOTERM_BP_FAT	GO:0032355~response to estradiol stimulus	9	1.09489	0.0718032	1410, 10628, 6774, 890, 6777, 894, 2026, 898, 6790	770	22	3656	1.94238	1	0.5037	74.3058
GOTERM_BP_FAT	GO:0006302~double-strand break repair	14	1.70316	0.0722337	10524, 9319, 10519, 4292, 4436, 3014, 25788, 51567, 7157, 641, 2237, 7334, 2547, 5591	770	41	3656	1.62129	1	0.504889	74.5223
GOTERM_BP_FAT	GO:0001525~angiogenesis	19	2.31144	0.0733762	3725, 6722, 5747, 57142, 841, 688, 1432, 4851, 8741, 3091, 90, 10672, 6885, 8841, 1499, 3516, 2185, 7048, 4691	770	61	3656	1.4789	1	0.509604	75.0885
GOTERM_BP_FAT	GO:0043279~response to alkaloid	7	0.851582	0.0749296	1020, 5970, 3066, 2185, 5468, 5536, 4609	770	15	3656	2.21576	1	0.516262	75.8392
GOTERM_BP_FAT	GO:0035282~segmentation	7	0.851582	0.0749296	1856, 3516, 2033, 8313, 5663, 5591, 2648	770	15	3656	2.21576	1	0.516262	75.8392
GOTERM_BP_FAT	GO:0048145~regulation of fibroblast proliferation	7	0.851582	0.0749296	890, 2355, 581, 8877, 1019, 1026, 7157	770	15	3656	2.21576	1	0.516262	75.8392
GOTERM_BP_FAT	GO:0070665~positive regulation of leukocyte proliferation	10	1.21655	0.0769317	958, 10673, 6777, 8767, 8440, 6776, 1026, 604, 641, 4690	770	26	3656	1.82617	1	0.524958	76.7753
GOTERM_BP_FAT	GO:0010243~response to organic nitrogen	10	1.21655	0.0769317	595, 6198, 598, 329, 5970, 4436, 2185, 1026, 898, 4086	770	26	3656	1.82617	1	0.524958	76.7753
GOTERM_BP_FAT	GO:0046660~female sex differentiation	10	1.21655	0.0769317	598, 2309, 581, 6777, 894, 2175, 6776, 898, 23411, 8204	770	26	3656	1.82617	1	0.524958	76.7753
GOTERM_BP_FAT	GO:0042035~regulation of cytokine biosynthetic process	10	1.21655	0.0769317	7189, 1051, 7098, 59307, 5606, 5970, 6777, 6776, 23139, 602	770	26	3656	1.82617	1	0.524958	76.7753
GOTERM_BP_FAT	GO:0032946~positive regulation of mononuclear cell proliferation	10	1.21655	0.0769317	958, 10673, 6777, 8767, 8440, 6776, 1026, 604, 641, 4690	770	26	3656	1.82617	1	0.524958	76.7753
GOTERM_BP_FAT	GO:0051053~negative regulation of DNA metabolic process	10	1.21655	0.0769317	4292, 990, 5883, 4436, 2956, 604, 6188, 7157, 6282, 641	770	26	3656	1.82617	1	0.524958	76.7753
GOTERM_BP_FAT	GO:0046545~development of primary female sexual characteristics	10	1.21655	0.0769317	598, 2309, 581, 6777, 894, 2175, 6776, 898, 23411, 8204	770	26	3656	1.82617	1	0.524958	76.7753
GOTERM_BP_FAT	GO:0050671~positive regulation of lymphocyte proliferation	10	1.21655	0.0769317	958, 10673, 6777, 8767, 8440, 6776, 1026, 604, 641, 4690	770	26	3656	1.82617	1	0.524958	76.7753
GOTERM_BP_FAT	GO:0030183~B cell differentiation	10	1.21655	0.0769317	10014, 1880, 581, 4436, 9759, 5591, 578, 604, 7157, 602	770	26	3656	1.82617	1	0.524958	76.7753
GOTERM_BP_FAT	GO:0016458~gene silencing	11	1.3382	0.080506	10014, 27044, 6597, 4088, 3066, 53615, 1788, 4086, 23411, 4087, 1789	770	30	3656	1.74095	1	0.540803	78.3618
GOTERM_BP_FAT	GO:0042060~wound healing	22	2.6764	0.0807926	6722, 958, 2065, 30008, 2149, 4851, 2768, 3091, 10672, 960, 7454, 5465, 26258, 1832, 5359, 3172, 57088, 5327, 4088, 891, 7048, 4086	770	74	3656	1.41158	1	0.541145	78.4844
GOTERM_BP_FAT	GO:0043405~regulation of MAP kinase activity	20	2.43309	0.0830349	4217, 5606, 1956, 4188, 6464, 4294, 7249, 5663, 857, 5608, 11184, 1616, 80824, 5515, 8737, 5518, 2185, 5585, 9043, 57761	770	66	3656	1.4388	1	0.550406	79.4218
GOTERM_BP_FAT	GO:0070482~response to oxygen levels	19	2.31144	0.0839831	598, 2033, 329, 3091, 2071, 857, 834, 1026, 9361, 768, 5465, 7391, 10370, 1387, 5327, 4088, 6777, 2185, 7046	770	62	3656	1.45505	1	0.55369	79.8064
GOTERM_BP_FAT	GO:0048592~eye morphogenesis	8	0.973236	0.0843516	7528, 6774, 5629, 5916, 581, 5451, 578, 1499	770	19	3656	1.99918	1	0.554355	79.9541
GOTERM_BP_FAT	GO:0030509~BMP signaling pathway	8	0.973236	0.0843516	659, 64750, 4090, 90, 6497, 4086, 7554, 4092	770	19	3656	1.99918	1	0.554355	79.9541
GOTERM_BP_FAT	GO:0043506~regulation of JUN kinase activity	8	0.973236	0.0843516	4217, 1616, 4188, 8737, 4294, 2185, 5585, 11184	770	19	3656	1.99918	1	0.554355	79.9541
GOTERM_BP_FAT	GO:0007612~learning	8	0.973236	0.0843516	3725, 1020, 3265, 5764, 60626, 2534, 2353, 8061	770	19	3656	1.99918	1	0.554355	79.9541
GOTERM_BP_FAT	GO:0010038~response to metal ion	16	1.94647	0.0857123	595, 5601, 6721, 4331, 5599, 598, 1956, 2033, 857, 6256, 311, 4982, 1499, 10628, 2185, 60	770	50	3656	1.51938	1	0.55941	80.4905
GOTERM_BP_FAT	GO:0043112~receptor metabolic process	6	0.729927	0.0867529	409, 1020, 5338, 819, 1855, 5468	770	12	3656	2.37403	1	0.562993	80.8914
GOTERM_BP_FAT	GO:0030330~DNA damage response, signal transduction by p53 class mediator	6	0.729927	0.0867529	10524, 28996, 27113, 51499, 7157, 602	770	12	3656	2.37403	1	0.562993	80.8914
GOTERM_BP_FAT	GO:0007017~microtubule-based process	28	3.40633	0.0895112	1410, 140735, 10403, 8841, 1499, 6790, 6687, 81565, 1647, 9126, 7277, 29911, 701, 22920, 9611, 5747, 11065, 4292, 7283, 4869, 857, 5531, 26271, 5979, 5590, 4751, 203068, 55142	770	100	3656	1.32945	1	0.573902	81.917
GOTERM_BP_FAT	GO:0045088~regulation of innate immune response	9	1.09489	0.0906499	2, 4615, 7098, 5970, 6777, 8767, 6776, 3654, 4792	770	23	3656	1.85793	1	0.577743	82.3251
GOTERM_BP_FAT	GO:0022602~ovulation cycle process	9	1.09489	0.0906499	598, 2309, 581, 6777, 894, 6776, 898, 23411, 8204	770	23	3656	1.85793	1	0.577743	82.3251
GOTERM_BP_FAT	GO:0030100~regulation of endocytosis	9	1.09489	0.0906499	811, 7249, 7376, 867, 857, 382, 10062, 5879, 274	770	23	3656	1.85793	1	0.577743	82.3251
GOTERM_BP_FAT	GO:0042542~response to hydrogen peroxide	10	1.21655	0.0948088	3725, 7837, 1410, 10628, 598, 2033, 6772, 5970, 2185, 8061	770	27	3656	1.75854	1	0.593959	83.7427
GOTERM_BP_FAT	GO:0007519~skeletal muscle tissue development	10	1.21655	0.0948088	6840, 1020, 2065, 1432, 2149, 7026, 2033, 857, 1855, 4654	770	27	3656	1.75854	1	0.593959	83.7427
GOTERM_BP_FAT	GO:0042129~regulation of T cell proliferation	10	1.21655	0.0948088	10673, 6777, 8767, 8440, 6776, 83737, 8764, 836, 641, 4690	770	27	3656	1.75854	1	0.593959	83.7427
GOTERM_BP_FAT	GO:0060538~skeletal muscle organ development	10	1.21655	0.0948088	6840, 1020, 2065, 1432, 2149, 7026, 2033, 857, 1855, 4654	770	27	3656	1.75854	1	0.593959	83.7427
GOTERM_BP_FAT	GO:0042110~T cell activation	19	2.31144	0.0955433	6146, 5971, 581, 8767, 7409, 5663, 7454, 7157, 1499, 641, 4088, 6777, 8440, 2534, 6776, 5591, 3932, 602, 4690	770	63	3656	1.43195	1	0.595948	83.9816
GOTERM_BP_FAT	GO:0010769~regulation of cell morphogenesis involved in differentiation	11	1.3382	0.0974578	7041, 81565, 57142, 5747, 7074, 4088, 396, 5663, 4086, 4092, 4087	770	31	3656	1.68479	1	0.602618	84.5888
GOTERM_BP_FAT	GO:0042176~regulation of protein catabolic process	11	1.3382	0.0974578	580, 5708, 7514, 4194, 5970, 10273, 83737, 6872, 3326, 207, 4092	770	31	3656	1.68479	1	0.602618	84.5888
GOTERM_BP_FAT	GO:0051384~response to glucocorticoid stimulus	11	1.3382	0.0974578	595, 133522, 2, 6198, 2033, 857, 2353, 6256, 1026, 898, 8061	770	31	3656	1.68479	1	0.602618	84.5888
GOTERM_BP_FAT	GO:0000302~response to reactive oxygen species	12	1.45985	0.099014	3725, 7837, 1410, 5796, 10628, 598, 2033, 6772, 5970, 2185, 2353, 8061	770	35	3656	1.6279	1	0.607763	85.0663
GOTERM_BP_FAT	GO:0002761~regulation of myeloid leukocyte differentiation	7	0.851582	0.0993914	3725, 7098, 3398, 6776, 2101, 5925, 1499	770	16	3656	2.07727	1	0.608257	85.18
GOTERM_BP_FAT	GO:0006839~mitochondrial transport	7	0.851582	0.0993914	598, 3320, 581, 7534, 5663, 578, 7157	770	16	3656	2.07727	1	0.608257	85.18
GOTERM_BP_FAT	GO:0048332~mesoderm morphogenesis	7	0.851582	0.0993914	659, 6927, 5573, 4088, 90, 4086, 4087	770	16	3656	2.07727	1	0.608257	85.18
GOTERM_BP_FAT	GO:0001707~mesoderm formation	7	0.851582	0.0993914	659, 6927, 5573, 4088, 90, 4086, 4087	770	16	3656	2.07727	1	0.608257	85.18
GOTERM_BP_FAT	GO:0060249~anatomical structure homeostasis	15	1.82482	0.0995943	7486, 6722, 580, 2149, 581, 7011, 3091, 641, 1499, 6927, 2547, 5591, 5879, 10728, 142	770	47	3656	1.51534	1	0.608071	85.2407
GOTERM_BP_FAT	GO:0030900~forebrain development	15	1.82482	0.0995943	1869, 7026, 6597, 4851, 581, 7155, 5663, 1385, 27429, 1499, 1020, 546, 2534, 7531, 5879	770	47	3656	1.51534	1	0.608071	85.2407
GOTERM_BP_FAT	GO:0051385~response to mineralocorticoid stimulus	5	0.608273	0.099658	595, 2353, 1026, 898, 8061	770	9	3656	2.63781	1	0.607346	85.2597
GOTERM_BP_FAT	GO:0018107~peptidyl-threonine phosphorylation	5	0.608273	0.099658	5599, 5170, 7048, 6872, 7046	770	9	3656	2.63781	1	0.607346	85.2597
GOTERM_BP_FAT	GO:0001959~regulation of cytokine-mediated signaling pathway	5	0.608273	0.099658	59307, 11140, 857, 3654, 3326	770	9	3656	2.63781	1	0.607346	85.2597
GOTERM_BP_FAT	GO:0018210~peptidyl-threonine modification	5	0.608273	0.099658	5599, 5170, 7048, 6872, 7046	770	9	3656	2.63781	1	0.607346	85.2597
GOTERM_BP_FAT	GO:0046823~negative regulation of nucleocytoplasmic transport	5	0.608273	0.099658	1020, 580, 4188, 4601, 4792	770	9	3656	2.63781	1	0.607346	85.2597
GOTERM_BP_FAT	GO:0002224~toll-like receptor signaling pathway	5	0.608273	0.099658	4615, 7098, 8767, 3654, 4792	770	9	3656	2.63781	1	0.607346	85.2597
GOTERM_BP_FAT	GO:0045766~positive regulation of angiogenesis	5	0.608273	0.099658	694, 3091, 8741, 8877, 7132	770	9	3656	2.63781	1	0.607346	85.2597
GOTERM_BP_FAT	GO:0045913~positive regulation of carbohydrate metabolic process	5	0.608273	0.099658	51085, 3172, 3091, 3667, 207	770	9	3656	2.63781	1	0.607346	85.2597
GOTERM_BP_FAT	GO:0010676~positive regulation of cellular carbohydrate metabolic process	5	0.608273	0.099658	51085, 3172, 3091, 3667, 207	770	9	3656	2.63781	1	0.607346	85.2597
GOTERM_BP_FAT	GO:0009798~axis specification	5	0.608273	0.099658	6045, 4188, 8312, 1499, 4087	770	9	3656	2.63781	1	0.607346	85.2597
GOTERM_BP_FAT	GO:0051148~negative regulation of muscle cell differentiation	5	0.608273	0.099658	10014, 4851, 3065, 9759, 8841	770	9	3656	2.63781	1	0.607346	85.2597
GOTERM_BP_FAT	GO:0010907~positive regulation of glucose metabolic process	5	0.608273	0.099658	51085, 3172, 3091, 3667, 207	770	9	3656	2.63781	1	0.607346	85.2597
GOTERM_BP_FAT	GO:0030855~epithelial cell differentiation	13	1.58151	0.0997637	3725, 7026, 6597, 5629, 8721, 5468, 836, 7041, 7430, 10628, 1832, 9139, 7251	770	39	3656	1.58268	1	0.606787	85.2913
GOTERM_BP_FAT	GO:0048511~rhythmic process	14	1.70316	0.0999085	3725, 4862, 2065, 598, 1956, 2309, 581, 1019, 8204, 6777, 6776, 894, 898, 23411	770	43	3656	1.54588	1	0.606381	85.3343

## Sheet: Function_KEGG
Category	Term	Count	%	PValue	Genes	List Total	Pop Hits	Pop Total	Fold Enrichment	Bonferroni	Benjamini	FDR
KEGG_PATHWAY	hsa05200:Pathways in cancer	99	12.0438	1.12461e-19	3725, 6774, 6772, 10401, 332, 330, 331, 3728, 3480, 1387, 2956, 1488, 1487, 5747, 4292, 3091, 3551, 25, 3716, 207, 8312, 8313, 6777, 6776, 4791, 4790, 4792, 1495, 4609, 8554, 5970, 26060, 7189, 7188, 7187, 3320, 9978, 7048, 7046, 595, 9618, 2308, 598, 329, 4436, 51588, 10928, 3326, 5337, 898, 998, 4149, 842, 841, 1869, 1147, 5894, 8772, 572, 5601, 1857, 1856, 5605, 581, 6257, 5925, 6256, 1855, 11…	428	176	1670	2.1948	1.39452e-17	1.39452e-17	1.29864e-16
KEGG_PATHWAY	hsa04110:Cell cycle	60	7.29927	1.8427e-16	8881, 1869, 7027, 7709, 983, 4616, 10393, 64682, 1387, 701, 5925, 25, 8454, 10912, 4088, 51434, 5934, 29882, 5591, 4085, 4609, 4087, 10971, 11200, 2033, 2932, 1027, 1026, 6500, 51343, 9126, 1647, 5347, 9978, 595, 8379, 4175, 7529, 890, 4176, 1111, 1017, 1875, 1019, 7157, 996, 994, 1022, 993, 990, 991, 9184, 7534, 3065, 894, 3066, 7532, 891, 7531, 898	428	90	1670	2.60125	2.75335e-14	1.37668e-14	2.55351e-13
KEGG_PATHWAY	hsa04010:MAPK signaling pathway	72	8.75912	1.64551e-15	4208, 3725, 6722, 4149, 1147, 5894, 11221, 2002, 5536, 3727, 4616, 6416, 4217, 5601, 5605, 9252, 5606, 4215, 4216, 23542, 3551, 1326, 6885, 5608, 207, 11184, 836, 7132, 409, 1616, 6197, 408, 5495, 80824, 10912, 2258, 5595, 4791, 4790, 5598, 5879, 4609, 5594, 6195, 7867, 8517, 3265, 5599, 5971, 1432, 1956, 5970, 9261, 2768, 3315, 7189, 2872, 5801, 1647, 51347, 23118, 9020, 7048, 1847, 7046, 1845, …	428	122	1670	2.30274	2.06501e-13	6.88338e-14	1.92069e-12
KEGG_PATHWAY	hsa05210:Colorectal cancer	37	4.50122	9.02588e-12	3725, 842, 5599, 5894, 1956, 2932, 332, 26060, 1499, 3480, 369, 2956, 572, 7048, 7046, 5601, 595, 1857, 1856, 4292, 581, 4436, 5900, 1855, 207, 836, 7157, 8312, 8313, 4088, 5595, 2353, 5879, 4609, 5594, 6934, 4087	428	51	1670	2.83077	1.11921e-09	2.79803e-10	1.04226e-08
KEGG_PATHWAY	hsa05215:Prostate cancer	36	4.37956	7.41585e-10	842, 3265, 8517, 1869, 1147, 5894, 1956, 2033, 5970, 2932, 1027, 1026, 1499, 3480, 369, 3320, 1387, 572, 595, 5605, 2308, 1017, 5170, 3551, 5925, 1385, 3326, 207, 7157, 468, 5595, 4790, 4792, 898, 5594, 6934	428	54	1670	2.60125	9.19565e-08	1.83913e-08	8.5634e-07
KEGG_PATHWAY	hsa04722:Neurotrophin signaling pathway	45	5.47445	9.0349e-10	3725, 10971, 3265, 5599, 1432, 5894, 6464, 5970, 9261, 2932, 8767, 5663, 7189, 572, 3654, 51135, 5580, 4217, 5601, 1445, 7529, 5605, 9252, 4215, 2309, 581, 3551, 25, 207, 7157, 6197, 468, 5595, 3667, 7534, 396, 7532, 4790, 5598, 7531, 4792, 5879, 998, 5594, 6195	428	76	1670	2.31032	1.12033e-07	1.86721e-08	1.0433e-06
KEGG_PATHWAY	hsa05212:Pancreatic cancer	33	4.0146	3.16588e-09	842, 8517, 1869, 5599, 1147, 6774, 5894, 1956, 6772, 5970, 369, 7048, 572, 7046, 5601, 595, 598, 1019, 3551, 5925, 10928, 5900, 3716, 207, 7157, 5337, 4088, 5595, 4790, 5879, 998, 4087, 5594	428	49	1670	2.62779	3.92569e-07	5.60813e-08	3.65578e-06
KEGG_PATHWAY	hsa04620:Toll-like receptor signaling pathway	36	4.37956	3.18665e-09	3725, 3661, 841, 8517, 5599, 1147, 1432, 6772, 5970, 7189, 4615, 6416, 7187, 8772, 8737, 23118, 51135, 3654, 5601, 958, 5605, 5606, 3551, 1326, 5608, 6885, 207, 29110, 7098, 5595, 2353, 4790, 4792, 5879, 3665, 5594	428	56	1670	2.50834	3.95144e-07	4.9393e-08	3.67976e-06
KEGG_PATHWAY	hsa05220:Chronic myeloid leukemia	35	4.25791	4.11163e-09	3265, 8517, 1869, 1147, 5894, 6464, 5970, 867, 1027, 1026, 369, 572, 7048, 7046, 1488, 595, 1487, 5605, 598, 1019, 3551, 5925, 25, 207, 7157, 4088, 3065, 6777, 5595, 6776, 3066, 4790, 4792, 4609, 5594	428	54	1670	2.52899	5.09842e-07	5.66491e-08	4.74788e-06
KEGG_PATHWAY	hsa04115:p53 signaling pathway	29	3.52798	7.60037e-08	842, 841, 11200, 7249, 6241, 1026, 983, 4616, 27113, 1647, 8795, 3486, 50484, 595, 4194, 581, 1111, 1017, 1019, 836, 7157, 5366, 55367, 64326, 10912, 894, 891, 900, 898	428	44	1670	2.57169	9.42441e-06	9.42445e-07	8.77648e-05
KEGG_PATHWAY	hsa05222:Small cell lung cancer	33	4.0146	9.96425e-08	4149, 8554, 842, 8517, 1869, 1147, 5970, 10401, 330, 1027, 331, 7189, 7188, 7187, 595, 5747, 9618, 598, 329, 1017, 6257, 1019, 51588, 3551, 5925, 6256, 207, 7157, 4790, 4792, 898, 1163, 4609	428	54	1670	2.38448	1.23556e-05	1.12324e-06	0.000115061
KEGG_PATHWAY	hsa04210:Apoptosis	31	3.77129	3.23813e-07	843, 842, 841, 8517, 840, 1147, 5970, 330, 331, 1439, 4615, 8772, 8837, 8795, 8737, 9020, 572, 51135, 3654, 8717, 598, 329, 581, 3551, 207, 836, 7157, 7132, 5573, 4790, 4792	428	51	1670	2.37172	4.0152e-05	3.34606e-06	0.00037392
KEGG_PATHWAY	hsa05213:Endometrial cancer	23	2.79805	6.28098e-07	595, 842, 3265, 5605, 5894, 4292, 1956, 2002, 2309, 2932, 5170, 207, 7157, 1499, 369, 8312, 8313, 5595, 572, 1495, 4609, 5594, 6934	428	33	1670	2.71948	7.78812e-05	5.99108e-06	0.00072529
KEGG_PATHWAY	hsa04114:Oocyte meiosis	33	4.0146	9.67849e-07	10971, 8881, 983, 6790, 6500, 3480, 10393, 64682, 9126, 5515, 5518, 5347, 5519, 9978, 7529, 1017, 26271, 996, 6197, 8454, 5499, 991, 51434, 7534, 5595, 29882, 891, 7532, 7531, 898, 4085, 5594, 6195	428	58	1670	2.22003	0.000120006	8.57234e-06	0.00111761
KEGG_PATHWAY	hsa04914:Progesterone-mediated oocyte maturation	29	3.52798	1.86355e-06	8881, 5599, 1432, 5894, 983, 10393, 3480, 2771, 64682, 51343, 369, 3320, 5347, 5601, 890, 1017, 3326, 207, 996, 6197, 994, 993, 51434, 5595, 29882, 891, 4085, 6195, 5594	428	49	1670	2.30927	0.000231054	1.54053e-05	0.00215191
KEGG_PATHWAY	hsa04622:RIG-I-like receptor signaling pathway	24	2.91971	2.1788e-06	843, 5601, 3661, 5300, 8517, 841, 5599, 1147, 1432, 5970, 3551, 6885, 29110, 7189, 7187, 8772, 10010, 8737, 1540, 64343, 4790, 4792, 8717, 3665	428	37	1670	2.53094	0.000270134	1.68855e-05	0.00251592
KEGG_PATHWAY	hsa04350:TGF-beta signaling pathway	27	3.28467	3.34069e-06	64750, 7027, 2033, 8200, 6500, 5515, 5518, 1387, 4090, 5519, 9978, 7048, 7046, 4092, 659, 90, 3398, 1875, 6198, 8454, 4088, 5934, 5595, 4609, 4086, 5594, 4087	428	45	1670	2.34112	0.00041416	2.43671e-05	0.00385757
KEGG_PATHWAY	hsa04621:NOD-like receptor signaling pathway	24	2.91971	1.4182e-05	5601, 841, 8517, 5599, 1147, 55914, 1432, 329, 5970, 8767, 330, 3551, 331, 6885, 3326, 834, 7189, 3320, 7128, 23118, 5595, 4790, 4792, 5594	428	40	1670	2.34112	0.00175704	9.76942e-05	0.0163754
KEGG_PATHWAY	hsa05221:Acute myeloid leukemia	21	2.55474	1.8038e-05	595, 3265, 8517, 1147, 5605, 6774, 5894, 5970, 3551, 3728, 207, 6198, 369, 6777, 5595, 6776, 572, 4790, 4609, 5594, 6934	428	33	1670	2.48301	0.00223424	0.000117716	0.0208273
KEGG_PATHWAY	hsa04012:ErbB signaling pathway	28	3.40633	3.19788e-05	3725, 3265, 5599, 5894, 6464, 1956, 2002, 2932, 867, 1027, 1026, 6416, 369, 8440, 572, 5601, 5747, 2065, 5605, 25, 207, 6198, 6777, 5595, 6776, 4609, 4690, 5594	428	52	1670	2.10101	0.00395759	0.000198252	0.0369211
KEGG_PATHWAY	hsa04310:Wnt signaling pathway	34	4.13625	3.84207e-05	3725, 1459, 5599, 2033, 2932, 5663, 1499, 6500, 5515, 5518, 1387, 5519, 9978, 5601, 595, 1488, 1487, 1857, 1856, 8607, 6885, 1855, 8061, 7157, 8454, 8312, 8313, 4088, 894, 4772, 5879, 4609, 6934, 4087	428	69	1670	1.92266	0.00475293	0.000226844	0.0443571
KEGG_PATHWAY	hsa04920:Adipocytokine signaling pathway	19	2.31144	5.8651e-05	5601, 8517, 5599, 1147, 6774, 5970, 6257, 3551, 6256, 6794, 7133, 207, 3717, 7132, 5465, 3667, 4790, 4792, 8717	428	30	1670	2.47118	0.00724655	0.000330533	0.0677059
KEGG_PATHWAY	hsa05014:Amyotrophic lateral sclerosis (ALS)	16	1.94647	6.37976e-05	4217, 842, 1432, 598, 5606, 581, 5608, 834, 7133, 7157, 836, 7132, 1616, 572, 5868, 5879	428	23	1670	2.71434	0.00787995	0.000343904	0.0736451
KEGG_PATHWAY	hsa05223:Non-small cell lung cancer	20	2.43309	0.000139468	595, 842, 3265, 1869, 5605, 5894, 1956, 2309, 6257, 5170, 1019, 5925, 6256, 11186, 207, 7157, 369, 5595, 572, 5594	428	34	1670	2.29522	0.0171465	0.000720374	0.160931
KEGG_PATHWAY	hsa04912:GnRH signaling pathway	23	2.79805	0.000150363	3725, 5601, 3265, 5599, 5605, 1432, 5606, 5894, 1956, 2002, 4215, 4216, 5608, 6416, 5337, 468, 5338, 5595, 2185, 5598, 998, 5580, 5594	428	42	1670	2.13674	0.0184737	0.000745581	0.173494
KEGG_PATHWAY	hsa04660:T cell receptor signaling pathway	29	3.52798	0.000180814	3725, 8517, 3265, 1147, 1432, 5894, 5970, 2932, 867, 8440, 9020, 5601, 5605, 7409, 3551, 1019, 1326, 6885, 207, 5595, 2534, 4772, 2353, 4790, 4792, 3932, 998, 4690, 5594	428	59	1670	1.91787	0.0221734	0.000862049	0.208595
KEGG_PATHWAY	hsa05216:Thyroid cancer	13	1.58151	0.000268342	595, 3265, 5605, 6257, 6256, 5468, 7157, 1499, 5979, 5595, 4609, 6934, 5594	428	18	1670	2.81802	0.0327312	0.00123179	0.309428
KEGG_PATHWAY	hsa05219:Bladder cancer	16	1.94647	0.000455982	595, 3265, 1869, 5605, 5894, 9252, 1956, 1019, 5925, 11186, 1026, 7157, 369, 5595, 4609, 5594	428	26	1670	2.40115	0.0549851	0.00201777	0.525278
KEGG_PATHWAY	hsa04520:Adherens junction	23	2.79805	0.000541327	1459, 1956, 2033, 6885, 7454, 1499, 3480, 1500, 1387, 8826, 4088, 5595, 2534, 7048, 7046, 60, 1495, 87, 5879, 998, 5594, 4087, 6934	428	45	1670	1.99429	0.0649383	0.00231259	0.623313
KEGG_PATHWAY	hsa05218:Melanoma	17	2.06813	0.00095915	595, 3265, 1869, 5605, 5894, 1956, 1019, 5925, 1026, 207, 7157, 3480, 369, 2258, 5595, 572, 5594	428	30	1670	2.21106	0.112185	0.00395853	1.10199
KEGG_PATHWAY	hsa05120:Epithelial cell signaling in Helicobacter pylori infection	18	2.18978	0.00256065	5601, 3725, 1445, 8517, 5599, 1147, 1432, 1956, 5970, 3551, 28964, 836, 6416, 9020, 4790, 4792, 5879, 998	428	35	1670	2.00668	0.272345	0.0102033	2.91729
KEGG_PATHWAY	hsa05130:Pathogenic Escherichia coli infection	16	1.94647	0.00693671	10971, 3059, 3875, 25, 7454, 1499, 7430, 7277, 203068, 7534, 8440, 2534, 60, 4691, 998, 4690	428	32	1670	1.95093	0.578168	0.0266129	7.72347
KEGG_PATHWAY	hsa04664:Fc epsilon RI signaling pathway	17	2.06813	0.00721063	5601, 695, 3265, 5599, 5605, 1432, 5606, 5894, 7409, 5608, 207, 6416, 5595, 2534, 5879, 5580, 5594	428	35	1670	1.89519	0.592354	0.0268262	8.01696
KEGG_PATHWAY	hsa04662:B cell receptor signaling pathway	19	2.31144	0.0100618	3725, 695, 3265, 8517, 1147, 5605, 5894, 5970, 2932, 7409, 3551, 207, 5595, 2353, 4790, 4772, 4792, 5879, 5594	428	42	1670	1.76513	0.714634	0.03621	11.0216
KEGG_PATHWAY	hsa04062:Chemokine signaling pathway	34	4.13625	0.010987	3265, 8517, 1147, 6774, 5894, 6772, 6464, 5970, 2932, 2268, 7454, 2771, 5580, 3055, 1445, 5747, 2309, 7409, 9564, 3551, 207, 3717, 409, 408, 5590, 7074, 6777, 5595, 2185, 4790, 4792, 5879, 998, 5594	428	90	1670	1.47404	0.745875	0.0383847	11.9772
KEGG_PATHWAY	hsa05214:Glioma	16	1.94647	0.0135258	595, 3265, 1869, 5605, 5894, 6464, 1956, 1019, 5925, 1026, 207, 7157, 3480, 369, 5595, 5594	428	34	1670	1.83617	0.815231	0.0458238	14.5513
KEGG_PATHWAY	hsa04370:VEGF signaling pathway	17	2.06813	0.0135687	7867, 842, 3265, 5747, 5605, 1432, 5894, 9261, 207, 3315, 5595, 8877, 572, 4772, 5879, 998, 5594	428	37	1670	1.79275	0.816225	0.0447526	14.5943
KEGG_PATHWAY	hsa04330:Notch signaling pathway	14	1.70316	0.0430761	1488, 1487, 1857, 1856, 2033, 4851, 5663, 1855, 22938, 2648, 3516, 1387, 3065, 3066	428	32	1670	1.70707	0.995746	0.133836	39.8573
KEGG_PATHWAY	hsa05217:Basal cell carcinoma	9	1.09489	0.0446912	1857, 1856, 8312, 8313, 2932, 1855, 7157, 1499, 6934	428	17	1670	2.0657	0.99655	0.135296	41.0191
KEGG_PATHWAY	hsa04720:Long-term potentiation	12	1.45985	0.0452936	6197, 3265, 5605, 369, 5894, 1387, 468, 2033, 5499, 5595, 6195, 5594	428	26	1670	1.80086	0.996809	0.133843	41.4471
KEGG_PATHWAY	hsa04730:Long-term depression	13	1.58151	0.0573747	3265, 5605, 5894, 2768, 10672, 3480, 2771, 5515, 369, 5518, 5595, 5519, 5594	428	30	1670	1.69081	0.999342	0.163644	49.4545
KEGG_PATHWAY	hsa04930:Type II diabetes mellitus	8	0.973236	0.0622616	5601, 5599, 5590, 5595, 3667, 3551, 5580, 5594	428	15	1670	2.081	0.999655	0.172868	52.3991
KEGG_PATHWAY	hsa04910:Insulin signaling pathway	27	3.28467	0.0724668	3265, 5599, 5894, 6464, 2002, 7249, 2932, 867, 2872, 2194, 369, 572, 5601, 5605, 2308, 5170, 3551, 207, 6198, 5590, 5573, 5499, 3667, 5595, 6720, 6194, 5594	428	78	1670	1.35065	0.999911	0.195016	58.0493
KEGG_PATHWAY	hsa04120:Ubiquitin mediated proteolysis	29	3.52798	0.0730633	64750, 8881, 8554, 10401, 10273, 867, 330, 331, 6500, 7189, 10393, 64682, 51343, 7334, 9978, 51465, 11065, 329, 51588, 51366, 996, 64326, 4591, 8454, 8452, 991, 51434, 29882, 83737	428	85	1670	1.33123	0.999918	0.192503	58.3598
KEGG_PATHWAY	hsa04623:Cytosolic DNA-sensing pathway	12	1.45985	0.0762725	3661, 8517, 11035, 1147, 8737, 5970, 3551, 4790, 834, 4792, 3665, 29110	428	28	1670	1.67223	0.999947	0.196374	59.9945
KEGG_PATHWAY	hsa04916:Melanogenesis	15	1.82482	0.0807377	3265, 1857, 1856, 5605, 5894, 2033, 2932, 1385, 1855, 1499, 2771, 1387, 5595, 6934, 5594	428	38	1670	1.54021	0.999971	0.203024	62.1715

## Sheet: All_Gene
2
12
19
22
23
25
27
31
47
52
54
60
70
71
81
86
87
90
92
93
94
95
100
103
112
118
128
135
136
142
143
151
152
156
157
160
161
162
163
164
166
176
182
196
203
207
212
215
217
226
240
267
274
283
293
301
302
306
308
309
310
311
321
327
328
329
330
331
332
333
334
335
339
348
351
358
360
362
369
372
375
377
378
381
382
387
389
390
391
392
394
396
397
399
403
406
407
408
409
415
421
427
433
435
445
467
468
475
476
481
488
493
498
506
509
518
527
529
537
538
540
546
550
558
567
572
573
578
580
581
583
585
595
597
598
599
602
604
605
608
613
617
633
634
636
638
639
641
642
648
650
652
657
659
661
662
663
664
665
666
682
688
694
695
701
705
708
710
712
716
717
718
721
728
754
760
768
771
780
811
817
819
821
823
824
826
832
833
834
836
837
838
839
840
841
842
843
847
857
858
859
864
865
867
868
871
874
875
889
890
891
892
894
896
898
899
900
901
902
904
905
912
914
915
916
919
921
925
928
929
939
947
950
958
960
961
962
965
972
975
977
983
988
990
991
993
994
996
997
998
1003
1017
1018
1019
1020
1022
1024
1026
1027
1028
1030
1031
1033
1039
1045
1048
1050
1051
1054
1058
1059
1060
1062
1063
1066
1069
1070
1072
1073
1102
1105
1107
1108
1111
1114
1123
1124
1131
1147
1152
1153
1154
1163
1164
1173
1174
1176
1191
1192
1195
1196
1198
1207
1211
1230
1234
1236
1263
1271
1277
1281
1282
1284
1289
1294
1298
1308
1312
1315
1316
1326
1345
1363
1364
1365
1366
1382
1385
1387
1390
1398
1399
1400
1407
1408
1410
1415
1420
1431
1432
1434
1436
1439
1441
1445
1452
1453
1454
1455
1459
1462
1466
1471
1475
1476
1477
1478
1479
1487
1488
1490
1495
1499
1500
1508
1510
1511
1512
1513
1514
1523
1525
1535
1540
1601
1602
1603
1605
1609
1615
1616
1627
1633
1634
1635
1639
1642
1643
1647
1649
1653
1654
1655
1660
1663
1665
1674
1676
1677
1687
1719
1725
1728
1729
1730
1736
1737
1738
1759
1760
1781
1783
1785
1786
1788
1789
1796
1797
1800
1803
1805
1808
1810
1813
1819
1820
1822
1827
1829
1831
1832
1838
1839
1840
1845
1846
1847
1848
1854
1855
1856
1857
1859
1861
1869
1871
1874
1875
1876
1877
1880
1891
1894
1906
1910
1911
1912
1915
1933
1936
1937
1938
1942
1944
1947
1948
1956
1958
1959
1964
1965
1967
1969
1973
1975
1977
1978
1979
1981
1982
1983
1984
1999
2002
2006
2010
2011
2017
2023
2026
2029
2030
2033
2037
2039
2040
2043
2048
2049
2054
2058
2060
2063
2065
2067
2068
2069
2071
2073
2079
2081
2091
2101
2107
2113
2114
2120
2122
2125
2130
2131
2132
2149
2157
2162
2168
2175
2178
2185
2186
2188
2189
2192
2194
2197
2199
2200
2202
2203
2207
2217
2222
2224
2235
2237
2239
2241
2258
2260
2261
2268
2271
2274
2275
2280
2286
2287
2288
2289
2295
2305
2308
2309
2314
2317
2318
2319
2331
2332
2335
2339
2353
2355
2494
2495
2512
2532
2533
2534
2547
2551
2580
2597
2617
2621
2623
2624
2627
2634
2635
2647
2648
2664
2665
2669
2671
2697
2703
2720
2733
2734
2735
2745
2752
2760
2764
2767
2768
2769
2770
2771
2773
2776
2778
2781
2782
2783
2784
2787
2790
2791
2800
2801
2802
2803
2804
2806
2812
2817
2831
2869
2870
2872
2873
2876
2882
2886
2887
2889
2896
2908
2919
2923
2931
2932
2935
2936
2944
2946
2948
2950
2956
2957
2958
2959
2960
2961
2962
2963
2965
2966
2967
2968
2975
2976
2982
2983
2984
2990
2992
2995
2997
3001
3002
3014
3028
3035
3054
3055
3059
3065
3066
3069
3073
3075
3077
3091
3104
3105
3106
3107
3108
3109
3122
3123
3133
3135
3146
3148
3150
3151
3155
3156
3159
3161
3163
3170
3172
3174
3178
3181
3183
3184
3185
3187
3189
3190
3191
3192
3198
3202
3205
3206
3211
3212
3213
3214
3216
3217
3219
3221
3224
3241
3251
3265
3267
3268
3275
3281
3297
3300
3301
3304
3306
3308
3309
3312
3313
3315
3316
3320
3326
3329
3336
3337
3339
3364
3371
3376
3383
3385
3394
3397
3398
3399
3416
3417
3426
3428
3430
3431
3433
3434
3437
3454
3455
3459
3460
3476
3479
3480
3482
3483
3485
3486
3487
3490
3491
3508
3516
3550
3551
3553
3554
3561
3563
3566
3569
3570
3572
3575
3577
3587
3588
3597
3601
3606
3608
3609
3611
3615
3620
3621
3625
3627
3632
3636
3638
3646
3654
3659
3660
3661
3663
3665
3667
3673
3675
3678
3679
3681
3682
3684
3685
3689
3692
3693
3695
3702
3703
3705
3710
3714
3716
3717
3725
3726
3727
3728
3732
3735
3757
3759
3784
3791
3792
3799
3815
3816
3831
3832
3835
3836
3837
3838
3839
3840
3842
3843
3845
3854
3856
3858
3872
3875
3880
3903
3908
3911
3914
3915
3918
3925
3927
3930
3932
3949
3956
3958
3959
3960
3964
3980
3981
3983
3985
3996
3998
4000
4001
4016
4023
4026
4034
4041
4043
4048
4050
4055
4057
4059
4060
4064
4066
4069
4071
4077
4082
4084
4085
4086
4087
4088
4090
4092
4093
4097
4116
4122
4123
4131
4134
4140
4144
4145
4147
4149
4150
4152
4162
4170
4172
4173
4174
4175
4176
4179
4188
4189
4191
4192
4194
4201
4204
4208
4209
4214
4215
4216
4217
4218
4224
4234
4236
4237
4255
4256
4267
4286
4288
4292
4294
4296
4300
4302
4303
4312
4314
4316
4318
4319
4323
4331
4335
4338
4355
4435
4436
4437
4478
4486
4524
4542
4582
4591
4595
4597
4598
4599
4601
4602
4605
4609
4610
4615
4616
4627
4628
4643
4645
4646
4649
4650
4653
4654
4665
4666
4673
4676
4677
4678
4681
4682
4686
4688
4689
4690
4691
4692
4698
4700
4701
4707
4709
4714
4715
4723
4726
4729
4734
4738
4739
4751
4756
4758
4772
4776
4779
4780
4781
4782
4783
4784
4790
4791
4792
4793
4794
4800
4801
4802
4809
4811
4817
4831
4832
4833
4835
4836
4839
4841
4848
4851
4853
4854
4862
4863
4869
4878
4893
4898
4899
4904
4905
4913
4921
4924
4925
4928
4931
4935
4942
4952
4957
4967
4968
4982
4983
4999
5000
5001
5007
5025
5034
5036
5037
5045
5048
5050
5052
5054
5062
5068
5073
5074
5082
5087
5089
5090
5092
5093
5094
5108
5110
5116
5119
5127
5128
5129
5134
5147
5148
5152
5159
5160
5162
5164
5165
5170
5175
5189
5190
5191
5192
5193
5194
5195
5196
5201
5202
5204
5208
5211
5213
5216
5217
5228
5230
5236
5245
5252
5257
5264
5267
5271
5272
5277
5279
5283
5287
5291
5293
5295
5296
5298
5300
5303
5307
5310
5316
5318
5320
5321
5325
5326
5327
5328
5330
5333
5335
5336
5337
5338
5339
5347
5348
5349
5350
5355
5356
5359
5360
5361
5364
5366
5372
5394
5411
5420
5422
5423
5425
5426
5427
5431
5432
5433
5434
5435
5436
5437
5439
5440
5441
5450
5451
5452
5464
5465
5468
5476
5478
5481
5493
5495
5499
5500
5501
5504
5509
5511
5514
5515
5518
5519
5520
5523
5524
5525
5526
5527
5528
5529
5530
5531
5536
5537
5549
5551
5552
5562
5564
5565
5566
5571
5573
5575
5576
5577
5580
5582
5583
5584
5585
5586
5588
5589
5590
5591
5594
5595
5597
5598
5599
5601
5604
5605
5606
5608
5610
5611
5612
5613
5619
5621
5627
5629
5631
5634
5635
5644
5663
5664
5681
5682
5683
5685
5686
5688
5689
5691
5692
5693
5694
5695
5696
5699
5700
5701
5702
5704
5705
5706
5707
5708
5710
5711
5714
5715
5716
5717
5718
5719
5720
5721
5724
5725
5728
5738
5742
5743
5747
5753
5757
5763
5764
5775
5777
5781
5789
5790
5792
5794
5796
5797
5799
5801
5810
5813
5817
5819
5822
5824
5825
5826
5828
5830
5833
5834
5859
5861
5862
5863
5864
5866
5867
5868
5869
5870
5872
5873
5876
5877
5879
5880
5883
5884
5885
5886
5887
5888
5889
5894
5898
5899
5900
5901
5903
5905
5909
5910
5911
5912
5916
5917
5921
5925
5926
5927
5928
5929
5930
5931
5932
5934
5937
5947
5950
5955
5965
5968
5970
5971
5976
5977
5978
5979
5980
5981
5982
5983
5984
5985
5987
5989
5993
5996
5997
5998
6001
6004
6009
6010
6015
6016
6018
6039
6041
6045
6046
6047
6048
6050
6059
6091
6093
6100
6103
6119
6120
6125
6128
6129
6130
6132
6133
6134
6135
6136
6138
6146
6147
6156
6160
6168
6175
6176
6181
6183
6188
6189
6191
6194
6195
6196
6197
6198
6204
6207
6209
6210
6222
6223
6230
6232
6234
6237
6240
6241
6256
6257
6259
6271
6272
6275
6277
6279
6280
6281
6282
6286
6294
6297
6300
6304
6305
6310
6311
6314
6347
6352
6355
6362
6363
6364
6366
6367
6382
6383
6385
6386
6387
6390
6396
6402
6403
6416
6418
6421
6426
6427
6428
6431
6432
6434
6446
6447
6449
6452
6453
6455
6461
6464
6477
6478
6483
6494
6497
6499
6500
6505
6513
6531
6548
6558
6566
6590
6595
6597
6598
6599
6601
6602
6603
6605
6607
6612
6613
6617
6618
6619
6620
6621
6625
6626
6627
6628
6629
6631
6633
6634
6635
6636
6637
6640
6642
6643
6647
6648
6651
6653
6654
6659
6662
6671
6678
6687
6689
6692
6710
6712
6717
6720
6721
6722
6728
6731
6732
6733
6734
6737
6741
6744
6745
6746
6747
6749
6760
6764
6768
6772
6773
6774
6775
6776
6777
6778
6780
6782
6786
6790
6794
6804
6809
6810
6811
6812
6814
6827
6829
6837
6839
6840
6845
6850
6855
6866
6867
6868
6872
6873
6874
6877
6878
6879
6880
6882
6883
6885
6888
6890
6892
6904
6907
6908
6921
6923
6924
6927
6928
6934
6944
6945
6949
6950
6990
6996
7001
7003
7004
7005
7011
7013
7016
7019
7024
7025
7026
7027
7029
7031
7037
7038
7039
7040
7041
7045
7046
7048
7049
7052
7057
7058
7067
7068
7070
7072
7074
7076
7077
7078
7082
7083
7088
7089
7097
7098
7099
7105
7110
7112
7122
7123
7126
7128
7130
7132
7133
7140
7150
7153
7155
7156
7157
7159
7162
7163
7165
7167
7171
7182
7184
7187
7188
7189
7203
7204
7205
7247
7249
7251
7257
7265
7266
7270
7276
7277
7283
7286
7295
7296
7297
7305
7307
7311
7316
7317
7318
7319
7320
7322
7323
7324
7325
7326
7327
7332
7334
7336
7337
7341
7343
7347
7351
7353
7355
7357
7360
7372
7374
7375
7376
7378
7384
7385
7391
7392
7402
7403
7405
7407
7408
7409
7411
7412
7414
7415
7416
7417
7422
7430
7431
7433
7436
7443
7447
7450
7453
7454
7456
7458
7465
7466
7469
7474
7486
7504
7508
7511
7514
7515
7518
7520
7525
7528
7529
7531
7532
7534
7536
7538
7542
7554
7572
7593
7625
7629
7695
7703
7706
7707
7709
7718
7727
7746
7750
7753
7755
7775
7781
7786
7791
7799
7803
7804
7812
7832
7837
7841
7846
7851
7867
7874
7884
7913
7916
7917
7918
7919
7920
7936
7965
7975
7979
8021
8027
8030
8031
8036
8050
8061
8065
8073
8085
8089
8099
8100
8106
8115
8125
8131
8148
8161
8165
8174
8175
8189
8190
8192
8195
8200
8202
8204
8208
8209
8218
8227
8237
8239
8241
8260
8289
8291
8295
8301
8312
8313
8317
8318
8321
8322
8324
8349
8357
8379
8396
8405
8408
8409
8412
8417
8428
8431
8440
8443
8445
8446
8450
8451
8452
8453
8454
8463
8464
8467
8473
8480
8481
8490
8495
8498
8500
8502
8504
8505
8507
8508
8517
8518
8519
8525
8527
8531
8533
8535
8540
8541
8542
8544
8546
8550
8553
8554
8557
8558
8562
8567
8569
8570
8573
[truncated: 2,181 more rows]
