# Supplementary material for: Gene module based regulator inference identifying miR-139 as a tumor suppressor in colorectal cancer
Source: Royal Society of Chemistry journal article supplement (doi:10.1039/c4mb00329b), 2014-09-30
Supplement: c4mb00329b2.xlsx [file c4mb00329b2.xlsx]

## Sheet: target_in_module
382
546
894
998
1523
1855
2113
2308
2332
2353
2494
3192
3205
3480
3725
4335
4851
5451
5515
5926
6597
7150
7532
8452
8507
9139
10471
10951
10971
27113
28996
51434
79720
93649
133522

## Sheet: bgnet
2
12
19
22
23
25
27
31
47
52
54
60
70
71
81
86
87
90
92
93
94
95
100
103
112
118
128
135
136
142
143
151
152
156
157
160
161
162
163
164
166
176
182
196
203
207
212
215
217
226
240
267
274
283
293
301
302
306
308
309
310
311
321
327
328
329
330
331
332
333
334
335
339
348
351
358
360
362
369
372
375
377
378
381
382
387
389
390
391
392
394
396
397
399
403
406
407
408
409
415
421
427
433
435
445
467
468
475
476
481
488
493
498
506
509
518
527
529
537
538
540
546
550
558
567
572
573
578
580
581
583
585
595
597
598
599
602
604
605
608
613
617
633
634
636
638
639
641
642
648
650
652
657
659
661
662
663
664
665
666
682
688
694
695
701
705
708
710
712
716
717
718
721
728
754
760
768
771
780
811
817
819
821
823
824
826
832
833
834
836
837
838
839
840
841
842
843
847
857
858
859
864
865
867
868
871
874
875
889
890
891
892
894
896
898
899
900
901
902
904
905
912
914
915
916
919
921
925
928
929
939
947
950
958
960
961
962
965
972
975
977
983
988
990
991
993
994
996
997
998
1003
1017
1018
1019
1020
1022
1024
1026
1027
1028
1030
1031
1033
1039
1045
1048
1050
1051
1054
1058
1059
1060
1062
1063
1066
1069
1070
1072
1073
1102
1105
1107
1108
1111
1114
1123
1124
1131
1147
1152
1153
1154
1163
1164
1173
1174
1176
1191
1192
1195
1196
1198
1207
1211
1230
1234
1236
1263
1271
1277
1281
1282
1284
1289
1294
1298
1308
1312
1315
1316
1326
1345
1363
1364
1365
1366
1382
1385
1387
1390
1398
1399
1400
1407
1408
1410
1415
1420
1431
1432
1434
1436
1439
1441
1445
1452
1453
1454
1455
1459
1462
1466
1471
1475
1476
1477
1478
1479
1487
1488
1490
1495
1499
1500
1508
1510
1511
1512
1513
1514
1523
1525
1535
1540
1601
1602
1603
1605
1609
1615
1616
1627
1633
1634
1635
1639
1642
1643
1647
1649
1653
1654
1655
1660
1663
1665
1674
1676
1677
1687
1719
1725
1728
1729
1730
1736
1737
1738
1759
1760
1781
1783
1785
1786
1788
1789
1796
1797
1800
1803
1805
1808
1810
1813
1819
1820
1822
1827
1829
1831
1832
1838
1839
1840
1845
1846
1847
1848
1854
1855
1856
1857
1859
1861
1869
1871
1874
1875
1876
1877
1880
1891
1894
1906
1910
1911
1912
1915
1933
1936
1937
1938
1942
1944
1947
1948
1956
1958
1959
1964
1965
1967
1969
1973
1975
1977
1978
1979
1981
1982
1983
1984
1999
2002
2006
2010
2011
2017
2023
2026
2029
2030
2033
2037
2039
2040
2043
2048
2049
2054
2058
2060
2063
2065
2067
2068
2069
2071
2073
2079
2081
2091
2101
2107
2113
2114
2120
2122
2125
2130
2131
2132
2149
2157
2162
2168
2175
2178
2185
2186
2188
2189
2192
2194
2197
2199
2200
2202
2203
2207
2217
2222
2224
2235
2237
2239
2241
2258
2260
2261
2268
2271
2274
2275
2280
2286
2287
2288
2289
2295
2305
2308
2309
2314
2317
2318
2319
2331
2332
2335
2339
2353
2355
2494
2495
2512
2532
2533
2534
2547
2551
2580
2597
2617
2621
2623
2624
2627
2634
2635
2647
2648
2664
2665
2669
2671
2697
2703
2720
2733
2734
2735
2745
2752
2760
2764
2767
2768
2769
2770
2771
2773
2776
2778
2781
2782
2783
2784
2787
2790
2791
2800
2801
2802
2803
2804
2806
2812
2817
2831
2869
2870
2872
2873
2876
2882
2886
2887
2889
2896
2908
2919
2923
2931
2932
2935
2936
2944
2946
2948
2950
2956
2957
2958
2959
2960
2961
2962
2963
2965
2966
2967
2968
2975
2976
2982
2983
2984
2990
2992
2995
2997
3001
3002
3014
3028
3035
3054
3055
3059
3065
3066
3069
3073
3075
3077
3091
3104
3105
3106
3107
3108
3109
3122
3123
3133
3135
3146
3148
3150
3151
3155
3156
3159
3161
3163
3170
3172
3174
3178
3181
3183
3184
3185
3187
3189
3190
3191
3192
3198
3202
3205
3206
3211
3212
3213
3214
3216
3217
3219
3221
3224
3241
3251
3265
3267
3268
3275
3281
3297
3300
3301
3304
3306
3308
3309
3312
3313
3315
3316
3320
3326
3329
3336
3337
3339
3364
3371
3376
3383
3385
3394
3397
3398
3399
3416
3417
3426
3428
3430
3431
3433
3434
3437
3454
3455
3459
3460
3476
3479
3480
3482
3483
3485
3486
3487
3490
3491
3508
3516
3550
3551
3553
3554
3561
3563
3566
3569
3570
3572
3575
3577
3587
3588
3597
3601
3606
3608
3609
3611
3615
3620
3621
3625
3627
3632
3636
3638
3646
3654
3659
3660
3661
3663
3665
3667
3673
3675
3678
3679
3681
3682
3684
3685
3689
3692
3693
3695
3702
3703
3705
3710
3714
3716
3717
3725
3726
3727
3728
3732
3735
3757
3759
3784
3791
3792
3799
3815
3816
3831
3832
3835
3836
3837
3838
3839
3840
3842
3843
3845
3854
3856
3858
3872
3875
3880
3903
3908
3911
3914
3915
3918
3925
3927
3930
3932
3949
3956
3958
3959
3960
3964
3980
3981
3983
3985
3996
3998
4000
4001
4016
4023
4026
4034
4041
4043
4048
4050
4055
4057
4059
4060
4064
4066
4069
4071
4077
4082
4084
4085
4086
4087
4088
4090
4092
4093
4097
4116
4122
4123
4131
4134
4140
4144
4145
4147
4149
4150
4152
4162
4170
4172
4173
4174
4175
4176
4179
4188
4189
4191
4192
4194
4201
4204
4208
4209
4214
4215
4216
4217
4218
4224
4234
4236
4237
4255
4256
4267
4286
4288
4292
4294
4296
4300
4302
4303
4312
4314
4316
4318
4319
4323
4331
4335
4338
4355
4435
4436
4437
4478
4486
4524
4542
4582
4591
4595
4597
4598
4599
4601
4602
4605
4609
4610
4615
4616
4627
4628
4643
4645
4646
4649
4650
4653
4654
4665
4666
4673
4676
4677
4678
4681
4682
4686
4688
4689
4690
4691
4692
4698
4700
4701
4707
4709
4714
4715
4723
4726
4729
4734
4738
4739
4751
4756
4758
4772
4776
4779
4780
4781
4782
4783
4784
4790
4791
4792
4793
4794
4800
4801
4802
4809
4811
4817
4831
4832
4833
4835
4836
4839
4841
4848
4851
4853
4854
4862
4863
4869
4878
4893
4898
4899
4904
4905
4913
4921
4924
4925
4928
4931
4935
4942
4952
4957
4967
4968
4982
4983
4999
5000
5001
5007
5025
5034
5036
5037
5045
5048
5050
5052
5054
5062
5068
5073
5074
5082
5087
5089
5090
5092
5093
5094
5108
5110
5116
5119
5127
5128
5129
5134
5147
5148
5152
5159
5160
5162
5164
5165
5170
5175
5189
5190
5191
5192
5193
5194
5195
5196
5201
5202
5204
5208
5211
5213
5216
5217
5228
5230
5236
5245
5252
5257
5264
5267
5271
5272
5277
5279
5283
5287
5291
5293
5295
5296
5298
5300
5303
5307
5310
5316
5318
5320
5321
5325
5326
5327
5328
5330
5333
5335
5336
5337
5338
5339
5347
5348
5349
5350
5355
5356
5359
5360
5361
5364
5366
5372
5394
5411
5420
5422
5423
5425
5426
5427
5431
5432
5433
5434
5435
5436
5437
5439
5440
5441
5450
5451
5452
5464
5465
5468
5476
5478
5481
5493
5495
5499
5500
5501
5504
5509
5511
5514
5515
5518
5519
5520
5523
5524
5525
5526
5527
5528
5529
5530
5531
5536
5537
5549
5551
5552
5562
5564
5565
5566
5571
5573
5575
5576
5577
5580
5582
5583
5584
5585
5586
5588
5589
5590
5591
5594
5595
5597
5598
5599
5601
5604
5605
5606
5608
5610
5611
5612
5613
5619
5621
5627
5629
5631
5634
5635
5644
5663
5664
5681
5682
5683
5685
5686
5688
5689
5691
5692
5693
5694
5695
5696
5699
5700
5701
5702
5704
5705
5706
5707
5708
5710
5711
5714
5715
5716
5717
5718
5719
5720
5721
5724
5725
5728
5738
5742
5743
5747
5753
5757
5763
5764
5775
5777
5781
5789
5790
5792
5794
5796
5797
5799
5801
5810
5813
5817
5819
5822
5824
5825
5826
5828
5830
5833
5834
5859
5861
5862
5863
5864
5866
5867
5868
5869
5870
5872
5873
5876
5877
5879
5880
5883
5884
5885
5886
5887
5888
5889
5894
5898
5899
5900
5901
5903
5905
5909
5910
5911
5912
5916
5917
5921
5925
5926
5927
5928
5929
5930
5931
5932
5934
5937
5947
5950
5955
5965
5968
5970
5971
5976
5977
5978
5979
5980
5981
5982
5983
5984
5985
5987
5989
5993
5996
5997
5998
6001
6004
6009
6010
6015
6016
6018
6039
6041
6045
6046
6047
6048
6050
6059
6091
6093
6100
6103
6119
6120
6125
6128
6129
6130
6132
6133
6134
6135
6136
6138
6146
6147
6156
6160
6168
6175
6176
6181
6183
6188
6189
6191
6194
6195
6196
6197
6198
6204
6207
6209
6210
6222
6223
6230
6232
6234
6237
6240
6241
6256
6257
6259
6271
6272
6275
6277
6279
6280
6281
6282
6286
6294
6297
6300
6304
6305
6310
6311
6314
6347
6352
6355
6362
6363
6364
6366
6367
6382
6383
6385
6386
6387
6390
6396
6402
6403
6416
6418
6421
6426
6427
6428
6431
6432
6434
6446
6447
6449
6452
6453
6455
6461
6464
6477
6478
6483
6494
6497
6499
6500
6505
6513
6531
6548
6558
6566
6590
6595
6597
6598
6599
6601
6602
6603
6605
6607
6612
6613
6617
6618
6619
6620
6621
6625
6626
6627
6628
6629
6631
6633
6634
6635
6636
6637
6640
6642
6643
6647
6648
6651
6653
6654
6659
6662
6671
6678
6687
6689
6692
6710
6712
6717
6720
6721
6722
6728
6731
6732
6733
6734
6737
6741
6744
6745
6746
6747
6749
6760
6764
6768
6772
6773
6774
6775
6776
6777
6778
6780
6782
6786
6790
6794
6804
6809
6810
6811
6812
6814
6827
6829
6837
6839
6840
6845
6850
6855
6866
6867
6868
6872
6873
6874
6877
6878
6879
6880
6882
6883
6885
6888
6890
6892
6904
6907
6908
6921
6923
6924
6927
6928
6934
6944
6945
6949
6950
6990
6996
7001
7003
7004
7005
7011
7013
7016
7019
7024
7025
7026
7027
7029
7031
7037
7038
7039
7040
7041
7045
7046
7048
7049
7052
7057
7058
7067
7068
7070
7072
7074
7076
7077
7078
7082
7083
7088
7089
7097
7098
7099
7105
7110
7112
7122
7123
7126
7128
7130
7132
7133
7140
7150
7153
7155
7156
7157
7159
7162
7163
7165
7167
7171
7182
7184
7187
7188
7189
7203
7204
7205
7247
7249
7251
7257
7265
7266
7270
7276
7277
7283
7286
7295
7296
7297
7305
7307
7311
7316
7317
7318
7319
7320
7322
7323
7324
7325
7326
7327
7332
7334
7336
7337
7341
7343
7347
7351
7353
7355
7357
7360
7372
7374
7375
7376
7378
7384
7385
7391
7392
7402
7403
7405
7407
7408
7409
7411
7412
7414
7415
7416
7417
7422
7430
7431
7433
7436
7443
7447
7450
7453
7454
7456
7458
7465
7466
7469
7474
7486
7504
7508
7511
7514
7515
7518
7520
7525
7528
7529
7531
7532
7534
7536
7538
7542
7554
7572
7593
7625
7629
7695
7703
7706
7707
7709
7718
7727
7746
7750
7753
7755
7775
7781
7786
7791
7799
7803
7804
7812
7832
7837
7841
7846
7851
7867
7874
7884
7913
7916
7917
7918
7919
7920
7936
7965
7975
7979
8021
8027
8030
8031
8036
8050
8061
8065
8073
8085
8089
8099
8100
8106
8115
8125
8131
8148
8161
8165
8174
8175
8189
8190
8192
8195
8200
8202
8204
8208
8209
8218
8227
8237
8239
8241
8260
8289
8291
8295
8301
8312
8313
8317
8318
8321
8322
8324
8349
8357
8379
8396
8405
8408
8409
8412
8417
8428
8431
8440
8443
8445
8446
8450
8451
8452
8453
8454
8463
8464
8467
8473
8480
8481
8490
8495
8498
8500
8502
8504
8505
8507
8508
8517
8518
8519
8525
8527
8531
8533
8535
8540
8541
8542
8544
8546
8550
8553
8554
8557
8558
8562
8567
8569
8570
8573
[truncated: 2,181 more rows]

## Sheet: GO_BP
Category	Term	Count	%	PValue	Genes	List Total	Pop Hits	Pop Total	Fold Enrichment	Bonferroni	Benjamini	FDR
GOTERM_BP_FAT	GO:0051252~regulation of RNA metabolic process	19	54.2857	5.40559e-07	3725, 10971, 3205, 5926, 2308, 6597, 4851, 1523, 133522, 28996, 2494, 9139, 546, 93649, 2113, 3192, 5451, 2353, 4335	35	578	3656	3.43371	0.000396691	0.000396691	0.000820367
GOTERM_BP_FAT	GO:0006355~regulation of transcription, DNA-dependent	18	51.4286	1.87735e-06	3725, 10971, 3205, 5926, 2308, 6597, 4851, 133522, 1523, 28996, 2494, 9139, 546, 93649, 2113, 5451, 2353, 4335	35	557	3656	3.37563	0.00137703	0.000688752	0.0028491
GOTERM_BP_FAT	GO:0045944~positive regulation of transcription from RNA polymerase II promoter	11	31.4286	2.23622e-06	3725, 133522, 28996, 2494, 2308, 6597, 93649, 4851, 2113, 5451, 2353	35	174	3656	6.60361	0.00164004	0.000546979	0.00339371
GOTERM_BP_FAT	GO:0045893~positive regulation of transcription, DNA-dependent	11	31.4286	1.45123e-05	3725, 133522, 28996, 2494, 2308, 6597, 93649, 4851, 2113, 5451, 2353	35	214	3656	5.36929	0.0105956	0.00265949	0.0220221
GOTERM_BP_FAT	GO:0051254~positive regulation of RNA metabolic process	11	31.4286	1.57608e-05	3725, 133522, 28996, 2494, 2308, 6597, 93649, 4851, 2113, 5451, 2353	35	216	3656	5.31958	0.0115019	0.00231103	0.0239165
GOTERM_BP_FAT	GO:0045935~positive regulation of nucleobase, nucleoside, nucleotide and nucleic acid metabolic process	12	34.2857	2.62835e-05	3725, 133522, 3480, 28996, 2494, 2308, 6597, 93649, 4851, 2113, 5451, 2353	35	281	3656	4.4608	0.0191074	0.00321022	0.0398813
GOTERM_BP_FAT	GO:0010557~positive regulation of macromolecule biosynthetic process	12	34.2857	3.31641e-05	3725, 133522, 3480, 28996, 2494, 2308, 6597, 93649, 4851, 2113, 5451, 2353	35	288	3656	4.35238	0.024049	0.00347151	0.0503191
GOTERM_BP_FAT	GO:0010604~positive regulation of macromolecule metabolic process	14	40	3.53541e-05	3725, 2308, 6597, 4851, 133522, 3480, 28996, 2494, 93649, 51434, 2113, 894, 5451, 2353	35	408	3656	3.58431	0.0256166	0.00323854	0.0536412
GOTERM_BP_FAT	GO:0051173~positive regulation of nitrogen compound metabolic process	12	34.2857	4.29016e-05	3725, 133522, 3480, 28996, 2494, 2308, 6597, 93649, 4851, 2113, 5451, 2353	35	296	3656	4.23475	0.0309998	0.00349282	0.0650891
GOTERM_BP_FAT	GO:0031328~positive regulation of cellular biosynthetic process	12	34.2857	5.17514e-05	3725, 133522, 3480, 28996, 2494, 2308, 6597, 93649, 4851, 2113, 5451, 2353	35	302	3656	4.15061	0.0372741	0.00379145	0.078511
GOTERM_BP_FAT	GO:0009891~positive regulation of biosynthetic process	12	34.2857	5.67418e-05	3725, 133522, 3480, 28996, 2494, 2308, 6597, 93649, 4851, 2113, 5451, 2353	35	305	3656	4.10979	0.0407942	0.00377917	0.0860787
GOTERM_BP_FAT	GO:0045941~positive regulation of transcription	11	31.4286	6.48258e-05	3725, 133522, 28996, 2494, 2308, 6597, 93649, 4851, 2113, 5451, 2353	35	254	3656	4.52373	0.0464693	0.00395746	0.0983367
GOTERM_BP_FAT	GO:0010628~positive regulation of gene expression	11	31.4286	8.18041e-05	3725, 133522, 28996, 2494, 2308, 6597, 93649, 4851, 2113, 5451, 2353	35	261	3656	4.40241	0.0582794	0.00460833	0.124077
GOTERM_BP_FAT	GO:0006357~regulation of transcription from RNA polymerase II promoter	12	34.2857	0.000162186	1523, 3725, 133522, 28996, 2494, 2308, 6597, 93649, 4851, 2113, 5451, 2353	35	342	3656	3.66516	0.11224	0.00846781	0.245856
GOTERM_BP_FAT	GO:0045449~regulation of transcription	19	54.2857	0.000209602	3725, 10971, 3205, 5926, 2308, 6597, 4851, 1523, 133522, 28996, 2494, 5515, 9139, 546, 93649, 2113, 5451, 2353, 4335	35	869	3656	2.28387	0.142611	0.0102052	0.317627
GOTERM_BP_FAT	GO:0042127~regulation of cell proliferation	11	31.4286	0.000676573	3725, 3480, 28996, 2494, 2308, 8452, 93649, 4851, 2113, 894, 4335	35	337	3656	3.40958	0.391509	0.0305712	1.02188
GOTERM_BP_FAT	GO:0060395~SMAD protein signal transduction	3	8.57143	0.000825039	3725, 28996, 2353	35	5	3656	62.6743	0.454378	0.0350094	1.24481
GOTERM_BP_FAT	GO:0051591~response to cAMP	4	11.4286	0.000871987	3725, 133522, 894, 2353	35	21	3656	19.8966	0.472875	0.0349479	1.31521
GOTERM_BP_FAT	GO:0043193~positive regulation of gene-specific transcription	5	14.2857	0.00114433	2494, 6597, 93649, 4851, 2113	35	51	3656	10.2409	0.568471	0.0432687	1.72266
GOTERM_BP_FAT	GO:0008284~positive regulation of cell proliferation	7	20	0.00407806	3725, 3480, 28996, 8452, 93649, 4851, 894	35	169	3656	4.32663	0.950184	0.139267	6.01326
GOTERM_BP_FAT	GO:0045892~negative regulation of transcription, DNA-dependent	7	20	0.0041991	1523, 10971, 28996, 5926, 9139, 6597, 5451	35	170	3656	4.30118	0.954436	0.136773	6.18647
GOTERM_BP_FAT	GO:0051253~negative regulation of RNA metabolic process	7	20	0.00471028	1523, 10971, 28996, 5926, 9139, 6597, 5451	35	174	3656	4.2023	0.968743	0.145743	6.91469
GOTERM_BP_FAT	GO:0032583~regulation of gene-specific transcription	5	14.2857	0.00498539	2494, 6597, 93649, 4851, 2113	35	76	3656	6.87218	0.974483	0.147427	7.3044
GOTERM_BP_FAT	GO:0045165~cell fate commitment	4	11.4286	0.00534488	6597, 4851, 5451, 998	35	39	3656	10.7136	0.980428	0.151175	7.81136
GOTERM_BP_FAT	GO:0010552~positive regulation of specific transcription from RNA polymerase II promoter	4	11.4286	0.00534488	6597, 93649, 4851, 2113	35	39	3656	10.7136	0.980428	0.151175	7.81136
GOTERM_BP_FAT	GO:0006350~transcription	14	40	0.00680082	3725, 5926, 3205, 2308, 6597, 4851, 133522, 1523, 28996, 2494, 93649, 2113, 5451, 4335	35	695	3656	2.10417	0.993321	0.181559	9.83818
GOTERM_BP_FAT	GO:0010605~negative regulation of macromolecule metabolic process	10	28.5714	0.00765908	1523, 3725, 10971, 28996, 5926, 5515, 9139, 6597, 51434, 5451	35	391	3656	2.67154	0.996459	0.195113	11.0134
GOTERM_BP_FAT	GO:0042981~regulation of apoptosis	10	28.5714	0.00887582	3725, 3480, 28996, 27113, 2308, 5515, 8452, 4851, 2113, 4335	35	400	3656	2.61143	0.998561	0.215233	12.655
GOTERM_BP_FAT	GO:0043067~regulation of programmed cell death	10	28.5714	0.00946244	3725, 3480, 28996, 27113, 2308, 5515, 8452, 4851, 2113, 4335	35	404	3656	2.58557	0.999068	0.220601	13.4362
GOTERM_BP_FAT	GO:0010941~regulation of cell death	10	28.5714	0.00976676	3725, 3480, 28996, 27113, 2308, 5515, 8452, 4851, 2113, 4335	35	406	3656	2.57284	0.999256	0.219964	13.839
GOTERM_BP_FAT	GO:0048598~embryonic morphogenesis	5	14.2857	0.00977648	3205, 6597, 8452, 4851, 5451	35	92	3656	5.67702	0.999262	0.213667	13.8518
GOTERM_BP_FAT	GO:0007167~enzyme linked receptor protein signaling pathway	6	17.1429	0.0115575	3725, 3480, 28996, 2308, 2353, 1855	35	150	3656	4.17829	0.999803	0.240613	16.1735
GOTERM_BP_FAT	GO:0001568~blood vessel development	5	14.2857	0.0125812	3725, 2308, 6597, 93649, 4851	35	99	3656	5.27561	0.999908	0.252044	17.4815
GOTERM_BP_FAT	GO:0001944~vasculature development	5	14.2857	0.0130199	3725, 2308, 6597, 93649, 4851	35	100	3656	5.22286	0.999934	0.252855	18.0362
GOTERM_BP_FAT	GO:0043065~positive regulation of apoptosis	7	20	0.0156474	3725, 28996, 27113, 5515, 8452, 4851, 2113	35	224	3656	3.26429	0.999991	0.288564	21.2858
GOTERM_BP_FAT	GO:0043068~positive regulation of programmed cell death	7	20	0.0159687	3725, 28996, 27113, 5515, 8452, 4851, 2113	35	225	3656	3.24978	0.999993	0.286512	21.6749
GOTERM_BP_FAT	GO:0010942~positive regulation of cell death	7	20	0.0166254	3725, 28996, 27113, 5515, 8452, 4851, 2113	35	227	3656	3.22115	0.999995	0.289525	22.4644
GOTERM_BP_FAT	GO:0010551~regulation of specific transcription from RNA polymerase II promoter	4	11.4286	0.017527	6597, 93649, 4851, 2113	35	60	3656	6.96381	0.999998	0.295863	23.5364
GOTERM_BP_FAT	GO:0016481~negative regulation of transcription	7	20	0.0176455	1523, 10971, 28996, 5926, 9139, 6597, 5451	35	230	3656	3.17913	0.999998	0.290986	23.6762
GOTERM_BP_FAT	GO:0030030~cell projection organization	5	14.2857	0.0196368	3480, 4851, 382, 1855, 998	35	113	3656	4.622	1	0.311508	25.9907
GOTERM_BP_FAT	GO:0030326~embryonic limb morphogenesis	3	8.57143	0.0220333	3205, 6597, 4851	35	25	3656	12.5349	1	0.335574	28.6893
GOTERM_BP_FAT	GO:0035113~embryonic appendage morphogenesis	3	8.57143	0.0220333	3205, 6597, 4851	35	25	3656	12.5349	1	0.335574	28.6893
GOTERM_BP_FAT	GO:0032870~cellular response to hormone stimulus	4	11.4286	0.022569	3480, 2308, 894, 2353	35	66	3656	6.33074	1	0.335467	29.2799
GOTERM_BP_FAT	GO:0000902~cell morphogenesis	5	14.2857	0.0245903	3480, 8452, 4851, 1855, 998	35	121	3656	4.31641	1	0.352811	31.4671
GOTERM_BP_FAT	GO:0001889~liver development	3	8.57143	0.0254827	4851, 894, 382	35	27	3656	11.6063	1	0.356364	32.4125
GOTERM_BP_FAT	GO:0030182~neuron differentiation	5	14.2857	0.0259377	1523, 3480, 4851, 1855, 998	35	123	3656	4.24623	1	0.354932	32.8899
GOTERM_BP_FAT	GO:0010629~negative regulation of gene expression	7	20	0.0269566	1523, 10971, 28996, 5926, 9139, 6597, 5451	35	253	3656	2.89012	1	0.359641	33.9473
GOTERM_BP_FAT	GO:0031668~cellular response to extracellular stimulus	3	8.57143	0.0272849	3725, 93649, 2353	35	28	3656	11.1918	1	0.356878	34.2847
GOTERM_BP_FAT	GO:0051726~regulation of cell cycle	6	17.1429	0.0275792	3725, 6597, 2113, 894, 4335, 998	35	187	3656	3.35157	1	0.35387	34.5858
GOTERM_BP_FAT	GO:0035107~appendage morphogenesis	3	8.57143	0.0291373	3205, 6597, 4851	35	29	3656	10.8059	1	0.363759	36.1586
GOTERM_BP_FAT	GO:0035108~limb morphogenesis	3	8.57143	0.0291373	3205, 6597, 4851	35	29	3656	10.8059	1	0.363759	36.1586
GOTERM_BP_FAT	GO:0045934~negative regulation of nucleobase, nucleoside, nucleotide and nucleic acid metabolic process	7	20	0.0308527	1523, 10971, 28996, 5926, 9139, 6597, 5451	35	261	3656	2.80153	1	0.374648	37.8492
GOTERM_BP_FAT	GO:0060173~limb development	3	8.57143	0.031039	3205, 6597, 4851	35	30	3656	10.4457	1	0.370528	38.0302
GOTERM_BP_FAT	GO:0048736~appendage development	3	8.57143	0.031039	3205, 6597, 4851	35	30	3656	10.4457	1	0.370528	38.0302
GOTERM_BP_FAT	GO:0051172~negative regulation of nitrogen compound metabolic process	7	20	0.0318826	1523, 10971, 28996, 5926, 9139, 6597, 5451	35	263	3656	2.78023	1	0.372702	38.8441
GOTERM_BP_FAT	GO:0006275~regulation of DNA replication	3	8.57143	0.0329889	3725, 3480, 5515	35	31	3656	10.1088	1	0.377184	39.896
GOTERM_BP_FAT	GO:0000904~cell morphogenesis involved in differentiation	4	11.4286	0.03367	3480, 8452, 4851, 1855	35	77	3656	5.42635	1	0.377697	40.5353
GOTERM_BP_FAT	GO:0060284~regulation of cell development	4	11.4286	0.03367	93649, 4851, 894, 7532	35	77	3656	5.42635	1	0.377697	40.5353
GOTERM_BP_FAT	GO:0008629~induction of apoptosis by intracellular signals	3	8.57143	0.034986	28996, 27113, 8452	35	32	3656	9.79286	1	0.383729	41.7525
GOTERM_BP_FAT	GO:0032989~cellular component morphogenesis	5	14.2857	0.0357866	3480, 8452, 4851, 1855, 998	35	136	3656	3.84034	1	0.385129	42.4816
GOTERM_BP_FAT	GO:0031327~negative regulation of cellular biosynthetic process	7	20	0.0362311	1523, 10971, 28996, 5926, 9139, 6597, 5451	35	271	3656	2.69815	1	0.383504	42.8828
GOTERM_BP_FAT	GO:0010558~negative regulation of macromolecule biosynthetic process	7	20	0.0362311	1523, 10971, 28996, 5926, 9139, 6597, 5451	35	271	3656	2.69815	1	0.383504	42.8828
GOTERM_BP_FAT	GO:0009890~negative regulation of biosynthetic process	7	20	0.0403426	1523, 10971, 28996, 5926, 9139, 6597, 5451	35	278	3656	2.63022	1	0.411553	46.4709
GOTERM_BP_FAT	GO:0048514~blood vessel morphogenesis	4	11.4286	0.0432411	3725, 6597, 93649, 4851	35	85	3656	4.91563	1	0.428452	48.8727
GOTERM_BP_FAT	GO:0007507~heart development	4	11.4286	0.0432411	6597, 93649, 4851, 1855	35	85	3656	4.91563	1	0.428452	48.8727
GOTERM_BP_FAT	GO:0032869~cellular response to insulin stimulus	3	8.57143	0.0434268	3480, 2308, 894	35	36	3656	8.70476	1	0.424399	49.0232
GOTERM_BP_FAT	GO:0009725~response to hormone stimulus	5	14.2857	0.0485493	133522, 3480, 2308, 894, 2353	35	150	3656	3.4819	1	0.456008	53.0125
GOTERM_BP_FAT	GO:0030855~epithelial cell differentiation	3	8.57143	0.050206	3725, 9139, 6597	35	39	3656	8.03516	1	0.461954	54.2389
GOTERM_BP_FAT	GO:0060541~respiratory system development	3	8.57143	0.050206	1523, 4851, 5451	35	39	3656	8.03516	1	0.461954	54.2389
GOTERM_BP_FAT	GO:0042325~regulation of phosphorylation	6	17.1429	0.0519899	3725, 5515, 894, 7532, 1855, 998	35	222	3656	2.82317	1	0.46851	55.5261
GOTERM_BP_FAT	GO:0051301~cell division	5	14.2857	0.0526103	4851, 7150, 51434, 894, 998	35	154	3656	3.39147	1	0.467229	55.9657
GOTERM_BP_FAT	GO:0048730~epidermis morphogenesis	2	5.71429	0.0545538	6597, 4851	35	6	3656	34.819	1	0.474486	57.3169
GOTERM_BP_FAT	GO:0040029~regulation of gene expression, epigenetic	3	8.57143	0.0549252	6597, 546, 2353	35	41	3656	7.64321	1	0.471607	57.5706
GOTERM_BP_FAT	GO:0051174~regulation of phosphorus metabolic process	6	17.1429	0.0580464	3725, 5515, 894, 7532, 1855, 998	35	229	3656	2.73687	1	0.485747	59.6482
GOTERM_BP_FAT	GO:0019220~regulation of phosphate metabolic process	6	17.1429	0.0580464	3725, 5515, 894, 7532, 1855, 998	35	229	3656	2.73687	1	0.485747	59.6482
GOTERM_BP_FAT	GO:0006469~negative regulation of protein kinase activity	3	8.57143	0.059796	5515, 7532, 1855	35	43	3656	7.28771	1	0.491088	60.7708
GOTERM_BP_FAT	GO:0009719~response to endogenous stimulus	5	14.2857	0.0612829	133522, 3480, 2308, 894, 2353	35	162	3656	3.22399	1	0.494715	61.7019
GOTERM_BP_FAT	GO:0045664~regulation of neuron differentiation	3	8.57143	0.062286	4851, 894, 7532	35	44	3656	7.12208	1	0.495462	62.3183
GOTERM_BP_FAT	GO:0032868~response to insulin stimulus	3	8.57143	0.062286	3480, 2308, 894	35	44	3656	7.12208	1	0.495462	62.3183
GOTERM_BP_FAT	GO:0033673~negative regulation of kinase activity	3	8.57143	0.062286	5515, 7532, 1855	35	44	3656	7.12208	1	0.495462	62.3183
GOTERM_BP_FAT	GO:0045661~regulation of myoblast differentiation	2	5.71429	0.0633607	93649, 4851	35	7	3656	29.8449	1	0.496597	62.9684
GOTERM_BP_FAT	GO:0048663~neuron fate commitment	2	5.71429	0.0633607	4851, 998	35	7	3656	29.8449	1	0.496597	62.9684
GOTERM_BP_FAT	GO:0035116~embryonic hindlimb morphogenesis	2	5.71429	0.0633607	6597, 4851	35	7	3656	29.8449	1	0.496597	62.9684
GOTERM_BP_FAT	GO:0010033~response to organic substance	7	20	0.0670491	3725, 133522, 3480, 2308, 5515, 894, 2353	35	315	3656	2.32127	1	0.512023	65.1208
GOTERM_BP_FAT	GO:0030900~forebrain development	3	8.57143	0.069965	6597, 546, 4851	35	47	3656	6.66748	1	0.522616	66.739
GOTERM_BP_FAT	GO:0042771~DNA damage response, signal transduction by p53 class mediator resulting in induction of apoptosis	2	5.71429	0.072088	28996, 27113	35	8	3656	26.1143	1	0.528711	67.8729
GOTERM_BP_FAT	GO:0009952~anterior/posterior pattern formation	3	8.57143	0.0725915	28996, 3205, 4851	35	48	3656	6.52857	1	0.526451	68.1364
GOTERM_BP_FAT	GO:0051348~negative regulation of transferase activity	3	8.57143	0.0725915	5515, 7532, 1855	35	48	3656	6.52857	1	0.526451	68.1364
GOTERM_BP_FAT	GO:0012502~induction of programmed cell death	5	14.2857	0.0743934	28996, 27113, 5515, 8452, 2113	35	173	3656	3.01899	1	0.530726	69.0632
GOTERM_BP_FAT	GO:0006917~induction of apoptosis	5	14.2857	0.0743934	28996, 27113, 5515, 8452, 2113	35	173	3656	3.01899	1	0.530726	69.0632
GOTERM_BP_FAT	GO:0007178~transmembrane receptor protein serine/threonine kinase signaling pathway	3	8.57143	0.0752501	3725, 28996, 2353	35	49	3656	6.39534	1	0.53025	69.4948
GOTERM_BP_FAT	GO:0043549~regulation of kinase activity	5	14.2857	0.0807984	5515, 894, 7532, 1855, 998	35	178	3656	2.93419	1	0.552066	72.1574
GOTERM_BP_FAT	GO:0014070~response to organic cyclic substance	3	8.57143	0.0861898	3725, 894, 2353	35	53	3656	5.91267	1	0.571802	74.5354
GOTERM_BP_FAT	GO:0051338~regulation of transferase activity	5	14.2857	0.0888437	5515, 894, 7532, 1855, 998	35	184	3656	2.83851	1	0.578719	75.6349
GOTERM_BP_FAT	GO:0035137~hindlimb morphogenesis	2	5.71429	0.0893063	6597, 4851	35	10	3656	20.8914	1	0.576122	75.822
GOTERM_BP_FAT	GO:0001708~cell fate specification	2	5.71429	0.0893063	4851, 5451	35	10	3656	20.8914	1	0.576122	75.822
GOTERM_BP_FAT	GO:0045740~positive regulation of DNA replication	2	5.71429	0.0893063	3725, 3480	35	10	3656	20.8914	1	0.576122	75.822
GOTERM_BP_FAT	GO:0007568~aging	3	8.57143	0.0918325	3725, 2353, 4335	35	55	3656	5.69766	1	0.582255	76.82
GOTERM_BP_FAT	GO:0050767~regulation of neurogenesis	3	8.57143	0.0975825	4851, 894, 7532	35	57	3656	5.49774	1	0.601119	78.9501
GOTERM_BP_FAT	GO:0006305~DNA alkylation	2	5.71429	0.0977988	546, 2353	35	11	3656	18.9922	1	0.597532	79.0266
GOTERM_BP_FAT	GO:0006306~DNA methylation	2	5.71429	0.0977988	546, 2353	35	11	3656	18.9922	1	0.597532	79.0266

## Sheet: KEGG
Category	Term	Count	%	PValue	Genes	List Total	Pop Hits	Pop Total	Fold Enrichment	Bonferroni	Benjamini	FDR
KEGG_PATHWAY	hsa04114:Oocyte meiosis	5	14.2857	0.00278748	3480, 10971, 5515, 51434, 7532	19	58	1670	7.57713	0.115577	0.115577	2.57773
KEGG_PATHWAY	hsa05200:Pathways in cancer	7	20	0.00792151	3725, 3480, 2308, 2113, 2353, 1855, 998	19	176	1670	3.49581	0.295266	0.160515	7.17059
KEGG_PATHWAY	hsa05210:Colorectal cancer	4	11.4286	0.0158445	3725, 3480, 2353, 1855	19	51	1670	6.8937	0.504774	0.208834	13.8796
KEGG_PATHWAY	hsa04310:Wnt signaling pathway	4	11.4286	0.0352922	3725, 5515, 894, 1855	19	69	1670	5.09535	0.794214	0.326475	28.5485
KEGG_PATHWAY	hsa04722:Neurotrophin signaling pathway	4	11.4286	0.0451645	3725, 10971, 7532, 998	19	76	1670	4.62604	0.869125	0.334158	35.1042
KEGG_PATHWAY	hsa04110:Cell cycle	4	11.4286	0.0686644	10971, 51434, 894, 7532	19	90	1670	3.90643	0.956281	0.406466	48.5997
KEGG_PATHWAY	hsa05211:Renal cell carcinoma	3	8.57143	0.0702262	3725, 2113, 998	19	41	1670	6.43132	0.959393	0.367255	49.4005
KEGG_PATHWAY	hsa04510:Focal adhesion	4	11.4286	0.0842248	3725, 3480, 894, 998	19	98	1670	3.58754	0.979169	0.383634	56.0958
